# Supplementary material
Source: publisher figshare collection journal article supplement (https://diabetesjournals.figshare.com/articles/dataset/_/24347638)
Supplement: Supplementary file 1 [file 1]

| Subject characteristics  | NGT        | T2D         | p value |
|--------------------------|------------|-------------|---------|
| Gender (M:F)             | 4:0        | 4:0         | ---     |
| BMI (kg/m <sup>2</sup> ) | 23.5 ± 1.5 | 31.3 ± 2.1  | 0.0001  |
| Mean glucose (mmol/L)    | 5.5 ± 0.4  | 8.5 ± 0.9   | 0.0001  |
| Fasting insulin (mU/l)   | 9.8 ± 6.4  | 25.3 ± 11.1 | 0.03    |
| HbA1c (%)                | 5.4 ± 0.14 | 7.0 ± 0.4   | <0.0001 |

Table S5. Clinical and metabolic characteristics of subjects with normal glucose tolerance (NGT) and type 2 diabetic (T2D) of Geneva cohort. Data are means ± SD or n. (gender distribution). p value is calculated upon an unpaired student's t-test with <0.05 considered as statistically significant.
