# Supplementary material
Source: publisher figshare collection journal article supplement (https://diabetesjournals.figshare.com/articles/dataset/_/24347638)
Supplement: Supplementary file 1 [file 1]

## Sheet: Table S8
ion	P1 β-Phb2 fl/fl	P2 β-Phb2 fl/fl	P3 β-Phb2 fl/fl	P4 β-Phb2 fl/fl	P5 β-Phb2 fl/fl	P6 β-Phb2 -/-	P7 β-Phb2 -/-	P8 β-Phb2 -/-	P9 β-Phb2 -/-	P10 β-Phb2 -/-	P11 β-Phb2 -/-
SM32:0	0.00229258	0.00283295	0.00187098	0.00246835	0.00173489	0.00209389	0.00221471	0.003133	0.00183003	0.00240678	0.00477436
SM34:0	0.0765698	0.0766221	0.0638375	0.109108	0.0658219	0.0579802	0.125179	0.0978839	0.0674241	0.05305	0.0627378
SM36:0	0.00813983	0.00655782	0.00614723	0.00552034	0.00483522	0.00559053	0.0205505	0.0129765	0.00395983	0.00441691	0.00647916
SM40:0	0.0322606	0.0351736	0.0322917	0.0719517	0.0502352	0.0267574	0.0560418	0.0651348	0.0320355	0.0775683	0.054169
SM42:0	0.0120537	0.014595	0.0122124	0.0285696	0.0185271	0.00899949	0.0256944	0.0283936	0.0117581	0.0292142	0.00830479
SM44:1	0.00103384	0.00220911	0.00189286	0.00228109	0.00157996	0.00147142	0.00364045	0.00527439	0.00189712	0.00244712	0.00267579
SM44:2	0.00294544	0.0038043	0.00321859	0.00342894	0.00278536	0.00242558	0.00483944	0.00745424	0.00185572	0.00184206	0.00275633
Cer34:1	0.0173459	0.0139314	0.0123601	0.0152624	0.00987389	0.00853629	0.0120567	0.0145088	0.0105655	0.0117986	0.013992
Cer34:1(-H2O)	0.0214515	0.0205902	0.0157629	0.0241704	0.0146197	0.0134751	0.0144282	0.0188365	0.01302	0.0117818	0.0317157
Cer36:1(-H2O)	0.00855624	0.00713947	0.00617276	0.0114444	0.00468199	0.0054561	0.0101666	0.00881344	0.0075949	0.00911451	0.0119963
Cer38:1	0.00637247	0.00761852	0.00710916	0.011031	0.00654031	0.00635327	0.00591573	0.00898013	0.00591404	0.00982881	0.0140479
Cer40:1	0.0452756	0.0399906	0.0389249	0.0988689	0.0492545	0.0252348	0.030655	0.0450097	0.0406767	0.0797633	0.0607511
Cer40:1(-H2O)	0.0286635	0.0275543	0.0291533	0.0768179	0.0428359	0.0156465	0.0183482	0.0206081	0.0305016	0.0420867	0.0200527
Cer42:1	0.0524382	0.0550366	0.0481776	0.101301	0.0563226	0.0335885	0.0415779	0.0522224	0.057122	0.0561879	0.0377161
Cer42:1(-H2O)	0.0549536	0.0487898	0.0380888	0.0772885	0.0449386	0.0261963	0.0342752	0.037378	0.0479362	0.031742	0.0217777
Cer42:2(-H2O)	0.0899946	0.0908646	0.0736537	0.0827383	0.052846	0.0508992	0.062571	0.0584606	0.0705131	0.0396816	0.0474505
Cer44:1	0.00956375	0.0208293	0.0236416	0.0257012	0.0130491	0.00681208	0.0159596	0.0429837	0.031199	0.0423237	0.0512762
CerP32:1	0.0255932	0.0302168	0.029983	0.0252075	0.0189952	0.0184359	0.0208301	0.0457876	0.0211795	0.0387102	0.700837
GlcCer28:1	0.000879889	0.00110869	0.000710278	0.000650525	0.000761887	0.000375527	0.00075791	0.00061335	0.00039327	0.00158323	0.00198223
GlcCer28:1(-H2O)	0.000628852	0.000496429	0.000469568	0.0010226	0.000192387	0.000393061	0.000437972	0.000775771	0.000383992	0.000910947	0.00120142
GlcCer28:2(-H2O)	0.000642285	0.000359083	0.000804192	0.000396395	0.000400097	0.000324385	0.000670936	0.00129295	0.000163446	0.000462196	0.00146766
GlcCer30:1(-H2O)	0.000802646	0.000459196	0.000824251	0.000378156	0.000531193	0.000545025	0.000633662	0.000765085	0.000256946	0.000663882	0.000664472
GlcCer30:2(-H2O)	0.000756469	0.000512149	0.00108867	0.00131686	0.00100365	0.000376257	0.00079829	0.00164557	0.000752995	0.00184542	0.00112759
GlcCer32:1(-H2O)	0.000862257	0.000369012	0.000500568	0.000496101	0.000451173	0.000683839	0.00121763	0.00137844	0.000395412	0.000759682	0.00179206
GlcCer32:2(-H2O)	0.00097896	0.00126258	0.000857075	0.00204885	0.00160294	0.000916168	0.00189788	0.00110702	0.000560999	0.00152273	0.00268921
GlcCer34:1(-H2O)	0.00642117	0.0049767	0.0041714	0.00774429	0.00423592	0.00336513	0.00886351	0.00502007	0.0041354	0.00413624	0.00659774
GlcCer34:2(-H2O)	0.000409719	0.000762018	0.000643718	0.00144453	0.000541408	0.00047781	0.000655405	0.00132073	0.000804384	0.00110087	0.00174508
GlcCer36:1(-H2O)	0.00150958	0.000998649	0.00118349	0.00112839	0.000579715	0.000634158	0.00325218	0.00120106	0.000824369	0.000978175	0.00138488
GlcCer36:2(-H2O)	0.000249358	0.000484845	0.000420331	0.000418282	0.000532895	0.000372604	0.000649193	0.000619762	0.000182717	0.000584888	0.00078976
GlcCer38:1(-H2O)	0.00107467	0.00227695	0.00174697	0.00451112	0.00265596	0.00184257	0.00425392	0.00215848	0.00172939	0.00199669	0.00351701
GlcCer38:2(-H2O)	0.000685944	0.000978792	0.00110143	0.00190902	0.00127265	0.00118722	0.00252999	0.00133142	0.00126831	0.000467238	0.00278094
GlcCer40:1(-H2O)	0.00382013	0.00462175	0.00461179	0.0122615	0.00872552	0.00307216	0.00663948	0.00353264	0.00631088	0.00870778	0.00206948
GlcCer40:2(-H2O)	0.000781657	0.000955625	0.000948253	0.00187132	0.0013067	0.000502651	0.00122228	0.000961699	0.000600968	0.00147567	0.00114996
GlcCer42:1(-H2O)	0.00354558	0.00333269	0.00362342	0.00990379	0.00511273	0.00247453	0.00625897	0.00331466	0.00481203	0.00396648	0.00435822
GlcCer42:2(-H2O)	0.00991722	0.0131272	0.0111839	0.0126822	0.00751587	0.00758725	0.0135632	0.00694347	0.00976681	0.00549929	0.0101617
GlcCer44:2(-H2O)	0.000404682	0.000402935	0.000534304	0.000738072	0.000349021	0.000200184	0.000355658	0.00100444	0.000224114	0.00030589	0.000257287
GlcDHCer28:0(-H2O)	0.00036606	0.000731405	0.000862546	0.00109921	0.000577161	0.000442742	0.00102349	0.0013186	0.000431812	0.00133281	0.000834506
GlcDHCer36:0(-H2O)	0.000238443	0.000359083	0.000237063	0.000359917	0.00030816	0.000182649	0.000375849	0.000367583	0.000361152	0.000322697	0.00149898
GlcDHCer38:0(-H2O)	0.000211576	0.000131554	0.000175974	0.000406122	0.000274109	0.000206759	0.000674043	0.000807827	0.000308335	0.000426901	0.000335592
GlcDHCer40:0(-H2O)	0.000377815	0.000390524	0.000272623	0.000392747	0.000270704	0.000286394	0.000552901	0.000367583	0.000132042	0.000561358	0.000507863
GlcDHCer40:1(-H2O)	0.000195624	0.000185333	0.000215181	0.000369644	0.000246017	0.000118357	0.000133566	0.000457341	0.000121336	0.000840357	0.000803184
GlcDHCer42:0(-H2O)	0.000319044	0.000217601	0.000231593	0.000175095	0.000560987	0.000235252	0.000214327	0.000504358	0.000154168	0.000327739	0.000832268
GlcDHCer42:1(-H2O)	0.000136013	0.00042031	0.000313653	0.000588512	0.000286027	0.000149042	0.000200349	0.000470164	0.000172725	0.000719345	0.000926234
LysoPI14:0	0.0117022	0.00626327	0.00248552	0.0102479	0.00459346	0.00518285	0.00475091	0.0123675	0.00663492	0.00345891	0.0128509
LysoPI14:1	0.00781405	0.0106062	0.010749	0.0132744	0.0119535	0.0189371	0.0266123	0.012594	0.00921651	0.0189316	0.0204174
LysoPI14:2	0.00275385	0.00359828	0.00258581	0.00327573	0.00808877	0.0156318	0.0230184	0.00593262	0.00471068	0.025641	0.015925
LysoPI16:0	0.00219552	0.00405003	0.00172874	0.00868177	0.00612915	0.0057235	0.00597009	0.00823642	0.00161448	0.00501861	0.0105868
LysoPI16:1	0.0254513	0.0134615	0.0039936	0.0368392	0.0169828	0.00222978	0.0146255	0.0216489	0.0186707	0.0082086	0.0859742
LysoPI16:2	0.00246671	0.00180038	0.00124458	0.00162692	0.00195792	0.00633793	0.00122228	0.00367797	0.000578129	0.00615477	0.00328433
LysoPI18:0	0.00862257	0.00530268	0.00854796	0.0077832	0.00364429	0.0133831	0.0148973	0.00685157	0.0124633	0.0193937	0.0149025
LysoPI18:1	0.00359344	0.00166055	0.00380487	0.00407825	0.00258105	0.00449025	0.00111667	0.00098307	0.00383992	0.00276309	0.00478778
LysoPI18:2	0.00296207	0.00342536	0.00853701	0.013779	0.00707831	0.013367	0.00725605	0.00678319	0.00412684	0.014202	0.00593774
LysoPI20:0	0.00280087	0.00850713	0.00156826	0.00445519	0.00461389	0.00527053	0.0165901	0.0064156	0.00450084	0.00615309	0.0187193
LysoPI20:1	0.00470841	0.00273036	0.00367904	0.00658064	0.00381114	0.00688661	0.00740981	0.00532354	0.00424318	0.00387236	0.0136362
LysoPI20:2	0.00171948	0.000981274	0.000412125	0.00206952	0.00143439	0.00159855	0.00464686	0.00606298	0.0037093	0.00111767	0.00645008
LysoPI22:0	0.0250877	0.0398252	0.0169801	0.0310355	0.0617392	0.0326767	0.0960977	0.088861	0.079861	0.0935149	0.130914
LysoPI22:1	0.00152217	0.00120301	0.00211533	0.00990501	0.00343743	0.00214942	0.0075294	0.00829199	0.00782472	0.00260847	0.0158176
LysoPI22:2	0.00195456	0.00133374	0.000602688	0.00472634	0.00125733	0.000857721	0.00202368	0.00194477	0.00394983	0.00117818	0.0227218
PI(O-)30:0	0.00408963	0.00773022	0.0110517	0.00571976	0.0121808	0.00583893	0.00897999	0.0273251	0.00458221	0.00755481	0.0251806
PI(O-)30:1	0.000762346	0.00476158	0.00204239	0.00503154	0.00176809	0.00135672	0.00316055	0.0025282	0.00136467	0.00224543	0.00710784
PI(O-)30:2	0.000912632	0.000383905	0.00086984	0.000544739	0.00123945	0.00187033	0.000495437	0.000906135	0.00196921	0.00115633	0.00170705
PI(O-)30:3	0.000908435	0.000452577	0.000295417	0.000942349	0.00195452	0.000908862	0.000319937	0.00120319	0.000558144	0.000879013	0.000630913
PI(O-)30:5	0.00175894	0.000723958	0.000462273	0.000688219	0.000464794	0.000461737	0.00108251	0.000752263	0.000317614	0.00146726	0.00126854
PI(O-)30:6	0.0010923	0.00111614	0.000387507	0.000618911	0.00050225	0.000529683	0.00175966	0.00100658	0.000508182	0.00142861	0.00156162
PI(O-)32:2	0.000705254	0.000910119	0.000382948	0.00281854	0.00125648	0.00203106	0.00156707	0.00117541	0.0012676	0.000749598	0.00398683
PI(O-)32:3	0.00105704	0.00125762	0.000680189	0.0013278	0.000626535	0.000689683	0.00114308	0.0016007	0.00159949	0.000954645	0.00174955
PI(O-)32:4	0.00233154	0.00103174	0.000408478	0.00321858	0.0020439	0.00137717	0.00118656	0.00299623	0.00160734	0.00139163	0.00973217
PI(O-)32:5	0.000483603	0.000869577	0.000773191	0.00101409	0.00118156	0.00069772	0.00447912	0.00143186	0.00546153	0.00122692	0.00097098
PI(O-)32:6	0.00133327	0.000321851	0.000623659	0.00137157	0.000442661	0.000696259	0.00208115	0.00118823	0.000495335	0.000816827	0.00530683
PI(O-)34:2	0.00122412	0.00134284	0.00299794	0.00450382	0.000684421	0.00348349	0.00212153	0.00291502	0.00183859	0.00187904	0.00719509
PI(O-)34:5	0.000556647	0.00132546	0.00102758	0.000945997	0.000721877	0.00100384	0.000521839	0.000812102	0.00145674	0.000514298	0.00209186
PI(O-)34:6	0.000371098	0.00076781	0.00098746	0.000773335	0.0012718	0.00118649	0.00197398	0.00189775	0.00329748	0.00127398	0.00122156
PI(O-)36:1	0.000641445	0.000650321	0.00216639	0.00395422	0.00384774	0.000432513	0.0035395	0.00185501	0.00398195	0.00156138	0.0020046
PI(O-)36:2	0.00732625	0.00686892	0.0125406	0.0104923	0.00835862	0.00931803	0.0118253	0.00617411	0.00317685	0.00536484	0.00851733
PI(O-)36:3	0.00111581	0.000756226	0.000437655	0.0057076	0.00141992	0.000615163	0.0018311	0.00373353	0.00190997	0.00383539	0.00559544
PI(O-)36:4	0.000858899	0.00124604	0.00179986	0.00309942	0.000563541	0.00524788	0.00143506	0.0047743	0.00152312	0.000734472	0.00284582
PI(O-)36:5	0.00101086	0.00067928	0.000877134	0.00382655	0.000602699	0.00207636	0.00197709	0.00107283	0.00074443	0.00106893	0.0015303
PI(O-)38:1	0.0114201	0.0132075	0.00333347	0.0196629	0.00707917	0.0124479	0.0118579	0.0135258	0.0123084	0.020935	0.0187126
PI(O-)38:2	0.0667338	0.0520025	0.0581863	0.11065	0.0850938	0.0377543	0.0951052	0.142808	0.0523778	0.0503071	0.281407
PI(O-)38:3	0.00195456	0.00583965	0.00224116	0.0110711	0.00474158	0.00586377	0.0099895	0.00313087	0.00781473	0.00300512	0.00350358
PI(O-)38:4	0.0223943	0.0377418	0.0341873	0.0582202	0.0354367	0.0335665	0.0377402	0.0733777	0.0310776	0.0181954	0.0715438
PI(O-)38:5	0.0107123	0.0112102	0.0120091	0.0214588	0.0127989	0.0063898	0.0179429	0.0256646	0.0084935	0.00536316	0.0237823
PI(O-)40:2	0.000926905	0.000688381	0.000900841	0.00152113	0.00130585	0.000745209	0.00119122	0.00090186	0.000693041	0.00129751	0.00183904
PI(O-)40:3	0.00240374	0.00335337	0.00160474	0.00520542	0.0020788	0.00477664	0.00255639	0.00643697	0.00354514	0.00981032	0.00627781
PI(O-)40:4	0.00326936	0.00989961	0.00628947	0.0115052	0.0109627	0.00399929	0.00601203	0.0128376	0.00530665	0.00952964	0.0146564
PI(O-)40:5	0.00144829	0.0011484	0.00110873	0.00175095	0.00318631	0.00063708	0.00126422	0.00411607	0.00104777	0.0037211	0.00587734
PI(O-)42:1	0.00341796	0.00695	0.00255664	0.00367334	0.00500121	0.00203398	0.0106806	0.00574028	0.00270008	0.00696151	0.00993129
PI(O-)42:2	0.00184122	0.00107146	0.00208616	0.00154302	0.00330974	0.00131654	0.00271015	0.00172465	0.000501045	0.00304377	0.00131776
PI(O-)42:3	0.00124091	0.00078022	0.00151082	0.00775158	0.00216563	0.00103014	0.00412502	0.00355615	0.00104206	0.00310428	0.00613015
PI(O-)42:6	0.000650681	0.00134946	0.00186368	0.00491116	0.00304244	0.00108274	0.00210755	0.0034322	0.000459648	0.00409758	0.00329775
PI(O-)44:1	0.00108139	0.0022604	0.00129564	0.0011977	0.00164636	0.00187471	0.00198796	0.000602665	0.000947132	0.00100171	0.00257511
PI(O-)44:4	0.000444982	0.00044844	0.000558011	0.000894928	0.000795938	0.00157809	0.0022582	0.000803553	0.00165587	0.000534467	0.000962031
PI28:0	0.000521384	0.000565101	0.000517892	0.00160017	0.00128031	0.00453993	0.000375849	0.000660367	0.00116339	0.00115633	0.00254603
PI28:1	0.00411398	0.00110373	0.000337359	0.00233703	0.00139864	0.000884022	0.00043176	0.000799279	0.000530308	0.00113112	0.00259077
PI28:2	0.000849663	0.00229681	0.000364713	0.00199049	0.00192217	0.00317883	0.00202368	0.00132287	0.00083222	0.000734472	0.00273619
PI28:3	0.000357665	0.00128327	0.000516069	0.000649309	0.000584823	0.000511418	0.000852648	0.00393228	0.000438236	0.000947922	0.00106495
PI28:4	0.000742196	0.000843929	0.000598129	0.00193334	0.000620576	0.000912515	0.00131392	0.000718069	0.00119765	0.000836995	0.00198447
PI28:5	0.00114016	0.000387214	0.000771367	0.00295959	0.0024772	0.000251325	0.00219763	0.000692424	0.00251664	0.000921031	0.00127525
PI28:6	0.000616258	0.00129402	0.000618188	0.00353472	0.00507357	0.000682377	0.00150961	0.00118823	0.00113199	0.00175466	0.00178535
PI30:0	0.00312831	0.00273201	0.000969224	0.000948429	0.00208561	0.00220348	0.00350533	0.00146392	0.00134326	0.00176307	0.00383246
PI30:1	0.00682333	0.0064966	0.0146961	0.00823188	0.00937249	0.00313426	0.010662	0.00822787	0.00445516	0.0117532	0.0103004
PI30:2	0.00406025	0.00260377	0.00189833	0.0050972	0.00496716	0.00650962	0.00609589	0.0126196	0.00664134	0.00807751	0.0105533
PI30:3	0.000369419	0.00095728	0.000965577	0.000464487	0.000967043	0.000630505	0.000571538	0.000624036	0.000247668	0.0084271	0.00110969
PI30:5	0.00100499	0.00120136	0.0021901	0.00112717	0.00136969	0.00105644	0.00114618	0.00269062	0.000593831	0.000626906	0.00144976
PI30:6	0.000272866	0.00115006	0.000663777	0.00348487	0.000451173	0.000552331	0.00199728	0.0024128	0.000606678	0.00127398	0.00147661
PI32:0	0.0100306	0.00526297	0.0129455	0.0178232	0.0143924	0.00557007	0.0148165	0.0271135	0.0078233	0.012249	0.0201825
PI32:1	0.00723389	0.00381257	0.00753223	0.0158862	0.00537577	0.0100837	0.0297076	0.0169857	0.00586123	0.0102473	0.0212586
PI32:2	0.00601061	0.0102347	0.0136959	0.0168796	0.012626	0.00699327	0.0132277	0.0140194	0.018892	0.0233468	0.01222
PI32:3	0.00599046	0.015549	0.0149943	0.0158521	0.021544	0.00549555	0.00939932	0.00964264	0.0068419	0.00808423	0.0150122
PI32:4	0.000371938	0.000706583	0.00106587	0.000549603	0.000571202	0.00187763	0.000615025	0.00147033	0.000480346	0.000648755	0.00113654
PI32:5	0.000953772	0.00034419	0.000373831	0.000525284	0.00103685	0.00157224	0.000742379	0.000564197	0.000594545	0.00109583	0.00287267
PI32:6	0.000437425	0.00314074	0.000508774	0.00434697	0.00121817	0.00216549	0.00471364	0.00322704	0.00123976	0.00139163	0.00585944
PI34:0	0.00321814	0.00262942	0.00469203	0.00544009	0.00282792	0.00187763	0.00370102	0.017114	0.0038806	0.000884055	0.00389511
PI34:1	0.0540695	0.0443369	0.0638311	0.0613986	0.062685	0.0484882	0.0687601	0.044922	0.0477056	0.0200324	0.0445666
PI34:2	0.163976	0.195739	0.270564	0.298715	0.192824	0.224151	0.243743	0.214816	0.223258	0.162253	0.181947
PI34:3	0.00430457	0.00486914	0.00474309	0.00734303	0.0025453	0.00713647	0.00170374	0.00589415	0.00522743	0.00285049	0.00478107
PI34:4	0.00143066	0.000646185	0.00191109	0.00352256	0.00066314	0.001958	0.00238555	0.0035818	0.000376854	0.00184878	0.00360426
PI34:5	0.00079593	0.00206349	0.000829722	0.0030216	0.00305436	0.000863565	0.00322733	0.00323772	0.00260943	0.00227569	0.00219925
PI34:6	0.00184877	0.00159685	0.000990195	0.00322831	0.000541408	0.000610779	0.00075791	0.00181654	0.00287351	0.000734472	0.000487727
PI36:0	0.00678387	0.0090681	0.00563664	0.0130798	0.00607892	0.00434413	0.0100904	0.00592193	0.0055536	0.00295974	0.00232453
PI36:1	0.0851107	0.0653821	0.063316	0.0924573	0.053121	0.03212	0.0512381	0.041071	0.0572162	0.0281099	0.0455958
PI36:2	0.341219	0.325719	0.39846	0.536153	0.324755	0.300112	0.331699	0.268135	0.324129	0.173821	0.305959
PI36:3	0.157592	0.169557	0.201535	0.239745	0.174241	0.169129	0.152824	0.149559	0.210557	0.14858	0.177651
PI36:4	0.379783	0.496491	0.548175	0.590048	0.421785	0.474257	0.567608	0.645435	0.561544	0.576214	0.597703
PI36:5	0.0139699	0.0120326	0.0228055	0.0259432	0.0144018	0.0119204	0.024191	0.0233009	0.027394	0.0174256	0.0162091
PI36:6	0.0191082	0.0237748	0.0238805	0.0207621	0.029482	0.018807	0.0426852	0.0229504	0.00532164	0.0294209	0.0576905
PI38:0	0.00547747	0.00339474	0.00333986	0.00227137	0.00373708	0.00442742	0.00523393	0.00195118	0.00147601	0.00290931	0.00393985
PI38:1	0.0071407	0.00368433	0.0142001	0.00723603	0.00612234	0.00817099	0.00723431	0.0222302	0.00513607	0.0122474	0.00505849
PI38:2	0.0379805	0.0336223	0.035203	0.0570468	0.026678	0.0323713	0.0268235	0.0199585	0.037552	0.0244729	0.0385953
PI38:3	0.585876	0.605376	0.588402	0.728582	0.604409	0.5578	0.58667	0.55648	0.614728	0.698995	0.816129
PI38:4	2.99563	3.28931	3.31576	3.90363	3.2352	2.75987	4.15647	3.2127	3.17649	4.16644	4.31676
PI38:5	0.157471	0.204136	0.173267	0.248163	0.146422	0.130514	0.175184	0.218547	0.178262	0.211419	0.349933
PI38:6	0.04016	0.0411961	0.0511455	0.0437591	0.0389269	0.0276911	0.0370087	0.0318771	0.0337791	0.00895988	0.0232252
PI40:0	0.00347925	0.00237789	0.00175609	0.00183606	0.0015059	0.00135818	0.00162454	0.00082065	0.00096783	0.00122188	0.00215226
PI40:1	0.00207126	0.000955625	0.00133485	0.00353351	0.00648668	0.00293408	0.0045925	0.00353051	0.00142962	0.000931115	0.00184128
PI40:2	0.00680654	0.00768223	0.00852698	0.00658307	0.0114462	0.00840479	0.0088107	0.0127799	0.00228539	0.00351773	0.00178088
PI40:3	0.0142738	0.0182611	0.0132938	0.0313857	0.0290539	0.0181276	0.0124838	0.0169729	0.0142855	0.0233905	0.0207754
PI40:4	0.010112	0.0151427	0.0203674	0.0158376	0.0154284	0.0267661	0.0202135	0.0175756	0.0244598	0.036737	0.0305836
PI40:5	0.0299935	0.0348162	0.0315732	0.0506717	0.0229681	0.0347516	0.0414847	0.0373353	0.0240851	0.0221266	0.0258093
PI40:6	0.0800774	0.0712416	0.0697513	0.0952272	0.0558927	0.0587268	0.0758997	0.0564795	0.0490624	0.0560383	0.0377004
PI42:0	0.00087653	0.000724786	0.00167221	0.00188835	0.00143013	0.000450778	0.00213395	0.00308171	0.00105919	0.00482197	0.00254155
PI42:1	0.0024835	0.00155961	0.00355413	0.00220449	0.00131692	0.00427399	0.00444961	0.0010771	0.00474351	0.0033026	0.00155715
PI42:2	0.0250382	0.0391459	0.0167276	0.0332765	0.023152	0.0318774	0.0458939	0.0163297	0.0139786	0.0344412	0.0173971
PI42:3	0.0837363	0.0774536	0.0586148	0.0666539	0.0560085	0.0633734	0.0832008	0.0350571	0.0492865	0.103322	0.0561356
PI42:4	0.00884002	0.00898122	0.0118978	0.00766161	0.00765548	0.00521938	0.0124527	0.00499443	0.00520173	0.00248746	0.0082757
PI42:5	0.0108752	0.0196925	0.0174123	0.0202429	0.0183023	0.00828497	0.0139794	0.0216788	0.0112707	0.0140356	0.0182607
PI42:6	0.0023223	0.000373976	0.000696601	0.00168772	0.0016719	0.000898634	0.00073306	0.00073944	0.000408259	0.00068237	0.0045551
PI44:0	0.00120229	0.00129071	0.00172691	0.000972748	0.000669099	0.000983383	0.000902347	0.000500084	0.00189284	0.00104877	0.000595117
PI44:1	0.00119809	0.00156375	0.00190198	0.00257049	0.000936397	0.000374066	0.00205008	0.00262437	0.00298057	0.00075296	0.000496676
PI44:2	0.00141639	0.00313412	0.0124549	0.00430076	0.00282792	0.00159782	0.0051221	0.00718496	0.0027636	0.00190425	0.00855536
PI44:3	0.0013383	0.00128161	0.000902664	0.00168407	0.00123945	0.00130046	0.00075791	0.00495809	0.000896456	0.00182525	0.00171376
PI44:4	0.0157624	0.0279382	0.0268192	0.0283763	0.0188267	0.0182313	0.0177612	0.0233629	0.0122549	0.0222476	0.034557
PI44:5	0.0877588	0.142505	0.114826	0.12535	0.1171	0.0995789	0.146715	0.144387	0.106528	0.103885	0.222209
PI44:6	0.00160445	0.00506854	0.003328	0.00687854	0.00538173	0.000827036	0.00196622	0.0038468	0.0013768	0.00153281	0.010824
LysoPC14:0	0.00288902	0.00424364	0.00557463	0.00833523	0.005094	0.00418705	0.00450397	0.00280389	0.00444231	0.004148	0.00511442
LysoPC16:0	1.15558	1.63433	2.15605	2.18739	1.74331	2.07196	2.3919	1.65225	1.79251	3.77668	2.71213
LysoPC16:1	0.0195129	0.0305444	0.0318586	0.038443	0.0318239	0.0288973	0.0245078	0.0156094	0.029152	0.0340798	0.0365795
LysoPC18:0	0.392846	0.592568	0.626181	0.732491	0.561724	0.615841	0.82166	0.701885	0.716424	1.98115	1.28654
LysoPC18:1	0.257321	0.405002	0.388243	0.506765	0.477178	0.440364	0.345347	0.286012	0.518903	0.626457	0.519362
LysoPC18:2	0.40629	0.498751	0.712593	0.934606	0.747338	0.722624	0.477617	0.453569	0.713427	0.795873	0.587429
LysoPC20:0	0.00275889	0.00314405	0.00764803	0.00398462	0.00375666	0.00788606	0.00288875	0.00345571	0.00473352	0.0230426	0.00683713
LysoPC20:1	0.00510806	0.00715436	0.00716296	0.00895779	0.00745968	0.00739583	0.00469811	0.00515471	0.00779403	0.016308	0.0123274
LysoPC20:2	0.00597787	0.00868915	0.00844584	0.0122092	0.00985516	0.00839748	0.00465462	0.00557144	0.0115669	0.0132995	0.0107747
LysoPC22:0	0.00347254	0.0027105	0.00305903	0.00528932	0.00224991	0.0045918	0.00459094	0.00572959	0.00253235	0.00625393	0.00451036
LysoPC22:1	0.00175978	0.00181858	0.00127649	0.00197589	0.001677	0.00153791	0.00103747	0.00124166	0.00152597	0.00179668	0.00212989
PC(O-)30:0	0.00259433	0.00274608	0.00200774	0.00397246	0.00255977	0.00194777	0.00410017	0.00346212	0.00283069	0.00250426	0.00297111
PC(O-)30:1	0.00626249	0.00640145	0.00616273	0.0120329	0.00638964	0.00729136	0.0100594	0.0138527	0.00689758	0.00774809	0.0102915
PC(O-)30:2	0.000901718	0.000777738	0.000871664	0.0016561	0.000872552	0.000910324	0.00141332	0.00225465	0.000742289	0.00121347	0.0011701
PC(O-)30:6	0.00104865	0.00141979	0.00147982	0.00126336	0.000977258	0.00217718	0.0016587	0.00102154	0.00121907	0.00200845	0.00176074
PC(O-)32:0	0.0328657	0.0285198	0.0344526	0.0397465	0.0285048	0.0268407	0.0368409	0.0598861	0.0254791	0.0356681	0.0513277
PC(O-)32:1	0.0903834	0.0861428	0.0905171	0.124946	0.0881729	0.0761574	0.149959	0.232456	0.0810322	0.173598	0.268948
PC(O-)32:2	0.00645979	0.00563115	0.00587461	0.00936756	0.00565414	0.0052318	0.00528052	0.00552229	0.00680764	0.00515811	0.00614357
PC(O-)32:3	0.00235588	0.00230922	0.00222657	0.0042351	0.00265852	0.00225462	0.00227684	0.00269703	0.00290777	0.0025362	0.00297558
PC(O-)32:6	0.00267745	0.00212223	0.00220925	0.00336449	0.00171276	0.00257608	0.00373364	0.00263933	0.00194565	0.00236476	0.00190169
PC(O-)34:0	0.0402457	0.0405739	0.0381891	0.050285	0.0388537	0.0351768	0.0331073	0.0430927	0.0382864	0.0254326	0.0330983
PC(O-)34:1	0.108978	0.117486	0.103909	0.121576	0.0917014	0.0945093	0.0921093	0.114374	0.0995552	0.0920258	0.10483
PC(O-)34:2	0.122787	0.12345	0.137907	0.195564	0.127188	0.134062	0.0984366	0.127675	0.13008	0.113811	0.106745
PC(O-)34:3	0.0388897	0.0329662	0.0398221	0.0550186	0.0442814	0.0371801	0.0323447	0.0339373	0.0421463	0.0344664	0.0351879
PC(O-)34:4	0.0064111	0.00588847	0.00358786	0.00835469	0.00483947	0.00404751	0.00411414	0.00495382	0.0064522	0.00316478	0.005365
PC(O-)34:5	0.00360267	0.00301001	0.0020123	0.00507288	0.00271726	0.00259727	0.00292137	0.00317147	0.00407688	0.0022219	0.00330223
PC(O-)36:0	0.0240702	0.0308679	0.0225274	0.031573	0.0252521	0.0254036	0.0255142	0.0250127	0.0275889	0.022335	0.0239747
PC(O-)36:1	0.0794847	0.0947078	0.0658115	0.106984	0.0793486	0.0805636	0.0809938	0.103556	0.0831178	0.103781	0.0846542
PC(O-)36:2	0.198626	0.209695	0.19884	0.305947	0.235573	0.211354	0.177161	0.266814	0.204131	0.210516	0.250047
PC(O-)36:3	0.0847925	0.0894746	0.0762241	0.101897	0.0770093	0.0711404	0.0584553	0.0749805	0.0875201	0.0801263	0.0665009
PC(O-)36:4	0.140979	0.137272	0.105681	0.136883	0.0992505	0.0963292	0.104112	0.138831	0.129409	0.113344	0.126388
PC(O-)36:5	0.0823351	0.0774983	0.0548756	0.0908996	0.0692142	0.0571648	0.0788832	0.0679537	0.0853432	0.0549089	0.0736423
PC(O-)36:6	0.0247603	0.0263066	0.0222976	0.0368817	0.0276118	0.0240491	0.0279122	0.033247	0.0315673	0.0241149	0.0216927
PC(O-)38:1	0.0419156	0.0405168	0.0385656	0.0497427	0.0340236	0.0344593	0.0538349	0.05895	0.0401193	0.0575308	0.0546702
PC(O-)38:2	0.0646139	0.0719648	0.0953304	0.124086	0.0871931	0.0974214	0.0913514	0.10378	0.0896171	0.109267	0.122563
PC(O-)38:3	0.0493871	0.0549273	0.0357646	0.0587746	0.0421881	0.0450099	0.0490125	0.0495617	0.0467071	0.0598536	0.0522047
PC(O-)38:4	0.120813	0.133732	0.0804274	0.124517	0.089374	0.0890503	0.109447	0.122999	0.111263	0.107487	0.163138
PC(O-)38:5	0.160026	0.151297	0.0987651	0.163247	0.10026	0.0943909	0.119775	0.146691	0.12905	0.111335	0.136134
PC(O-)38:6	0.115636	0.119641	0.101432	0.140109	0.0879865	0.0925294	0.110948	0.124549	0.106441	0.105902	0.107667
PC(O-)40:2	0.0274411	0.0214043	0.0164613	0.0280565	0.0179482	0.0157166	0.0254832	0.0261924	0.021081	0.0176055	0.0264447
PC(O-)40:3	0.0279037	0.022422	0.0173403	0.0343502	0.0172365	0.0313404	0.0484612	0.0222281	0.0315444	0.0332932	0.0295411
PC(O-)40:4	0.0593068	0.04703	0.030965	0.0618777	0.0342006	0.0480674	0.0686095	0.0421887	0.0605893	0.0474499	0.0670379
PC(O-)40:5	0.0675743	0.0663841	0.0501726	0.0725767	0.0444993	0.0557643	0.0727671	0.0682465	0.0605394	0.075427	0.0562005
PC(O-)40:6	0.117112	0.124547	0.0993687	0.142002	0.0895758	0.0908453	0.115143	0.16875	0.113963	0.0997755	0.10756
PC(O-)42:1	0.0154031	0.0129419	0.00658762	0.0128549	0.00808537	0.00881903	0.0114137	0.010848	0.00993239	0.0111499	0.0149987
PC(O-)42:2	0.0140304	0.0127681	0.00860722	0.0185904	0.00918691	0.00870871	0.0109943	0.0148935	0.0107132	0.0103347	0.013455
PC(O-)42:3	0.0289163	0.0248545	0.0168078	0.0349144	0.0166185	0.0215248	0.0281327	0.0209052	0.0240659	0.0270191	0.0286685
PC(O-)42:4	0.0176607	0.0136932	0.00780121	0.0287034	0.00770059	0.0140523	0.023593	0.0108928	0.0178264	0.0172861	0.0167214
PC(O-)42:5	0.0201031	0.0181296	0.00991836	0.0231514	0.00934695	0.0144636	0.0227684	0.0153167	0.0202616	0.0261603	0.0177998
PC(O-)42:6	0.0378075	0.0430073	0.0298217	0.0461228	0.0261425	0.0322449	0.0386984	0.035897	0.0420036	0.0363421	0.0375416
PC(O-)44:1	0.00208806	0.0015017	0.000809662	0.00219963	0.000771251	0.00127854	0.00234672	0.00118823	0.00108346	0.00134289	0.00161532
PC(O-)44:2	0.00167918	0.00141068	0.000898105	0.00191023	0.00101982	0.00118868	0.00209978	0.00124807	0.00189641	0.00119163	0.00213884
PC(O-)44:3	0.00237771	0.0022058	0.00111602	0.00300093	0.00131266	0.00160512	0.00257192	0.00185929	0.00174723	0.00243871	0.00265789
PC(O-)44:4	0.00432808	0.00457707	0.00203601	0.00524311	0.00189323	0.00260458	0.00391535	0.00309453	0.00331032	0.00316142	0.00349463
PC(O-)44:5	0.00617097	0.00527042	0.00368998	0.00894198	0.00351149	0.00466851	0.00717374	0.00418446	0.00695039	0.00590603	0.00749936
PC(O-)44:6	0.00619448	0.00556331	0.00320856	0.00919247	0.00298455	0.00368294	0.00775926	0.00392801	0.00716309	0.00342361	0.00664025
PC28:0	0.00260776	0.00221324	0.00167403	0.00390315	0.00189237	0.00280184	0.00369015	0.00427422	0.0026908	0.00317991	0.00236704
PC28:1	0.00337179	0.0035114	0.00337359	0.00480902	0.00345956	0.0034075	0.00624033	0.00635363	0.00371858	0.00465221	0.005893
PC28:2	0.00103605	0.00090681	0.000709366	0.00171933	0.00107856	0.000887675	0.00123316	0.00227175	0.00118052	0.00131096	0.00131328
PC28:6	0.00102178	0.000829863	0.00062913	0.00101774	0.00218606	0.000970963	0.00127664	0.001699	0.000966403	0.00136138	0.00472066
PC30:0	0.0293789	0.0255156	0.0264636	0.0384843	0.0271172	0.0238357	0.040368	0.0379593	0.0238303	0.0182492	0.0297737
PC30:1	0.173791	0.163332	0.15879	0.1873	0.156592	0.133162	0.278923	0.324118	0.146287	0.166169	0.314705
PC30:2	0.0208545	0.0198505	0.0261836	0.0222334	0.0230235	0.0200264	0.0309935	0.0302358	0.021328	0.028199	0.0220104
PC30:3	0.00091683	0.0010789	0.000731249	0.00195036	0.000735498	0.000804387	0.001404	0.00176953	0.000938567	0.00103196	0.00164664
PC32:0	0.476533	0.471033	0.480403	0.506067	0.517989	0.408835	0.560915	1.27624	0.340959	0.371265	0.617467
PC32:1	0.190362	0.191493	0.178857	0.207541	0.187715	0.162148	0.188243	0.170804	0.167066	0.104468	0.146989
PC32:2	0.0603597	0.0533884	0.0552221	0.0653516	0.0483343	0.0356758	0.0491865	0.0405559	0.0370959	0.0316882	0.0370404
PC32:3	0.0048906	0.00482611	0.00425346	0.00769079	0.00459771	0.0037991	0.00469656	0.00496237	0.00431812	0.0035379	0.00406738
PC32:4	0.0013064	0.000733887	0.000679278	0.00166826	0.000743159	0.000737172	0.00125335	0.00148743	0.00130472	0.000926073	0.00164664
PC32:6	0.00328027	0.00328305	0.00296603	0.00421565	0.002547	0.00289609	0.00430518	0.0046418	0.00317899	0.00321857	0.00544554
PC34:0	0.504017	0.602304	0.556815	0.519211	0.63949	0.5406	0.572116	0.657172	0.578227	0.569804	0.435272
PC34:1	7.84385	8.77552	9.11019	7.62982	10.0182	9.33373	8.72724	8.23123	9.3657	8.65041	6.33635
PC34:2	26.0553	22.199	30.8538	25.219	31.3931	31.8448	25.3244	24.311	24.8076	25.8693	19.823
PC34:3	0.653175	0.683172	0.59496	0.586047	0.632265	0.606751	0.471126	0.367181	0.581321	0.465403	0.44674
PC34:4	0.0212072	0.022959	0.0149742	0.0192178	0.0143405	0.0124443	0.0123455	0.0101897	0.0166587	0.00935149	0.0175224
PC34:5	0.00511477	0.00570148	0.0037611	0.00718131	0.00422571	0.00361572	0.00386565	0.00393869	0.00584838	0.00316646	0.00415239
PC34:6	0.00838161	0.0103853	0.00818963	0.0163908	0.00928906	0.00905063	0.00876566	0.00957425	0.00979107	0.0052203	0.00719509
PC36:0	0.151178	0.152845	0.13533	0.175261	0.139728	0.140069	0.15345	0.192333	0.180722	0.171871	0.153956
PC36:1	1.89524	1.97735	1.55459	1.83009	1.65158	1.5877	1.6864	1.84593	2.11092	2.16333	1.9028
PC36:2	11.1918	10.8714	10.6428	12.8985	11.6482	11.0372	10.0985	11.3286	13.3606	12.1775	12.7357
PC36:3	4.27194	4.53998	3.55065	4.05401	4.1383	3.60971	2.83689	2.6607	4.34677	3.11789	4.10266
PC36:4	7.96327	8.37159	5.85201	6.23015	6.05328	6.00512	6.29285	5.15001	6.43727	5.8595	9.58896
PC36:5	0.682245	0.64387	0.414493	0.759785	0.40432	0.400825	0.409172	0.402431	0.624373	0.331953	0.481973
PC36:6	0.0260625	0.0290783	0.0196863	0.0292116	0.0164874	0.0147836	0.0175562	0.015494	0.0195893	0.0123482	0.0183994
PC38:0	0.0655937	0.0763375	0.0620103	0.0799903	0.055742	0.057045	0.063975	0.0888803	0.0756763	0.0629427	0.0632658
PC38:1	0.0989329	0.0750947	0.125401	0.0859471	0.0804944	0.0956461	0.0973743	0.194291	0.0909775	0.150155	0.115748
PC38:2	0.467103	0.453044	0.43226	0.455555	0.450872	0.358954	0.484237	0.775987	0.456196	0.503644	0.590656
PC38:3	1.30981	1.50288	1.07297	1.2481	1.18905	1.04043	1.20377	1.29555	1.60088	1.37498	1.52862
PC38:4	4.36494	5.33549	2.71164	3.42608	3.13045	2.83446	4.34555	4.00727	4.20241	4.49396	6.45098
PC38:5	2.68514	2.84838	1.8838	2.16657	1.83481	1.87447	2.2028	2.21505	2.31001	1.85544	2.63728
PC38:6	12.247	12.2934	11.4322	9.831	8.72679	10.1197	12.9315	12.1317	9.64879	8.87686	9.83556
PC40:0	0.0226773	0.0259078	0.0159571	0.0205529	0.0155689	0.0149531	0.0204993	0.0169345	0.0199162	0.0156558	0.0183994
PC40:1	0.00924974	0.00894482	0.00525186	0.00865624	0.00477903	0.00536331	0.00659909	0.00893739	0.00682906	0.00601359	0.00878356
PC40:2	0.016021	0.0108809	0.00860631	0.0105458	0.00738137	0.00812351	0.00779498	0.0137352	0.00827937	0.0103683	0.0105734
PC40:3	0.0270641	0.0197314	0.0162872	0.0174402	0.0123971	0.0184067	0.0150106	0.0167592	0.0170056	0.0239031	0.0178446
PC40:4	0.0882861	0.0756342	0.0616337	0.0628383	0.0476677	0.0648748	0.0705508	0.0882327	0.0710784	0.0934611	0.0756469
PC40:5	0.51526	0.486742	0.350288	0.36264	0.277082	0.367711	0.542249	0.674228	0.478384	0.532793	0.385416
PC40:6	2.7765	2.72433	2.27626	2.31748	1.88148	2.46499	3.75281	4.39679	2.98944	3.27527	2.16257
PC42:0	0.00551609	0.00415842	0.00259767	0.00819783	0.00265596	0.0036055	0.00856065	0.00463112	0.00671486	0.00332109	0.006157
PC42:1	0.0078216	0.00585951	0.00382948	0.0125582	0.00337444	0.00450851	0.0118377	0.00552443	0.00764843	0.00334294	0.0079334
PC42:2	0.00804074	0.00719325	0.004899	0.00617573	0.00456196	0.00577391	0.00583187	0.00507777	0.00545439	0.00555476	0.00708323
PC42:3	0.00568065	0.00626327	0.00413493	0.0065624	0.00352	0.00408769	0.00468413	0.00505854	0.00461932	0.00332109	0.00584825
PC42:4	0.00740097	0.00703108	0.00487074	0.00624991	0.00400267	0.00489281	0.00628071	0.010132	0.0049405	0.00688756	0.00651944
PC42:5	0.0127122	0.0120384	0.00984542	0.0110638	0.00723069	0.0103175	0.0102815	0.0102923	0.00880469	0.0134407	0.0110298
PC42:6	0.0177842	0.0194881	0.0277619	0.0180591	0.0151152	0.031439	0.0126142	0.0140836	0.0195236	0.0390615	0.0158042
PC44:0	0.00192937	0.00142061	0.000973783	0.00328424	0.000771251	0.00112731	0.00252222	0.00111343	0.00210981	0.00124037	0.00165111
PC44:1	0.00213591	0.00156458	0.000976518	0.00328546	0.000733795	0.00142612	0.00344631	0.00170755	0.00240816	0.00119835	0.00149003
PC44:2	0.00184038	0.0013536	0.00074219	0.00229812	0.000659735	0.00111197	0.0026589	0.00126944	0.00180862	0.00124205	0.00131552
PC44:3	0.00198059	0.00226951	0.00146523	0.00248051	0.00125562	0.00162119	0.00183731	0.00153658	0.0021141	0.00120171	0.00186589
PC44:4	0.0063666	0.00597865	0.00428629	0.00608575	0.00431935	0.00456112	0.00356124	0.00353264	0.00480061	0.00339168	0.00502046
PC44:5	0.00304938	0.00237624	0.0013777	0.0022969	0.00139608	0.00201864	0.00234828	0.00166267	0.00131471	0.00136474	0.00187932
PC44:6	0.00303427	0.00205852	0.00209527	0.00285501	0.00200559	0.00271782	0.00243525	0.00190203	0.00218261	0.00268242	0.0023223
LysoPE14:0	0.00232902	0.00119308	0.00141326	0.00331829	0.0010079	0.00124421	0.00136362	0.00182082	0.00112128	0.00206055	0.00107613
LysoPE14:1	0.00592413	0.007923	0.00872028	0.0139711	0.00685613	0.00835218	0.0120178	0.0110702	0.00588121	0.0117011	0.00623978
LysoPE16:0	0.0372349	0.0594316	0.0805094	0.112829	0.0772298	0.0755218	0.0738605	0.059869	0.0705217	0.060267	0.0409758
LysoPE16:1	0.00135174	0.0018401	0.00285479	0.00419862	0.00278451	0.00261554	0.00181712	0.00108138	0.00165445	0.00315974	0.00145423
LysoPE18:0	0.0314249	0.042716	0.0609754	0.0727859	0.0560323	0.0572671	0.0506806	0.0595912	0.056905	0.0796557	0.0424748
LysoPE18:1	0.0262455	0.0310177	0.032226	0.0446358	0.035784	0.0277408	0.0211128	0.01752	0.0252392	0.032468	0.0251403
LysoPE18:2	0.0431213	0.046522	0.0829475	0.131368	0.075397	0.0794758	0.0450848	0.036177	0.052108	0.105458	0.0456897
LysoPE20:0	0.00123755	0.000769464	0.00106131	0.00159044	0.000898942	0.000996534	0.00103436	0.000978796	0.000953556	0.00176475	0.00071593
LysoPE20:1	0.00155576	0.00189967	0.00264873	0.00414877	0.00262021	0.00252202	0.00151893	0.00194477	0.00111058	0.00337823	0.00176969
LysoPE20:2	0.00157507	0.00267327	0.00226487	0.00262156	0.00242442	0.00235325	0.00268996	0.00163703	0.0010492	0.00347235	0.00129986
PE(O-)30:0	0.00142226	0.00282551	0.00289217	0.00443573	0.00398395	0.00325554	0.00307357	0.00490253	0.00374784	0.00488415	0.00621293
PE(O-)30:1	0.00308801	0.00578174	0.00484156	0.00583892	0.00714386	0.00580459	0.0055492	0.0038297	0.00641794	0.00651444	0.00630913
PE(O-)32:2	0.00225178	0.00196255	0.00225119	0.00258994	0.00184811	0.00147215	0.00397592	0.00505213	0.00176936	0.00157651	0.00388392
PE(O-)34:0	0.00287559	0.00305304	0.00240163	0.00380952	0.00262702	0.00221663	0.0029136	0.00223969	0.00192424	0.00319672	0.00207396
PE(O-)34:1	0.00683845	0.00526297	0.00583267	0.00732844	0.0080079	0.00589153	0.00491709	0.00606939	0.00449584	0.00429254	0.00862024
PE(O-)34:2	0.00472688	0.00494857	0.00676269	0.00818081	0.0053264	0.00726213	0.00357522	0.0061677	0.00601825	0.00531105	0.00463117
PE(O-)34:3	0.00323241	0.00347252	0.00342739	0.00474093	0.0035183	0.00406358	0.00455988	0.00517181	0.00352159	0.00346563	0.00465802
PE(O-)34:4	0.0315156	0.026175	0.0215381	0.0317894	0.0210511	0.0236238	0.0391908	0.0394339	0.0273605	0.0349924	0.0369845
PE(O-)36:3	0.0143284	0.0144792	0.011204	0.017569	0.0133981	0.0131215	0.0101495	0.0127543	0.0109423	0.0150928	0.0118486
PE(O-)36:4	0.0100868	0.0103919	0.00952447	0.0111501	0.00922777	0.0100326	0.00834788	0.0121473	0.00882182	0.00880694	0.0106964
PE(O-)36:5	0.00482427	0.0058471	0.00614085	0.00934568	0.00681016	0.00582797	0.00559269	0.00830481	0.00605394	0.00747581	0.00656418
PE(O-)36:6	0.00165399	0.00146033	0.00121814	0.00344596	0.00175362	0.00187544	0.00180935	0.00339373	0.00155167	0.00127398	0.00210752
PE(O-)38:4	0.0537933	0.0560236	0.027027	0.0404274	0.0392734	0.0357832	0.0340687	0.0392416	0.0372779	0.0351135	0.047795
PE(O-)38:5	0.0309355	0.0401305	0.0294916	0.0390838	0.0328769	0.029568	0.0210009	0.03292	0.0320212	0.0292847	0.0339798
PE(O-)38:6	0.0345994	0.0408461	0.0485196	0.0500698	0.0449088	0.0479819	0.0318182	0.0471489	0.0432626	0.0382194	0.0355638
PE(O-)40:6	0.0870737	0.11556	0.0753059	0.0976894	0.0752566	0.084823	0.0663078	0.0921607	0.0921402	0.0775918	0.07875
PE28:0	0.00111245	0.00104498	0.000884428	0.00121837	0.000699744	0.00121717	0.00147855	0.00144896	0.000672342	0.000991621	0.00097098
PE28:2	0.00115024	0.00110786	0.0017178	0.00235648	0.00103429	0.000781008	0.00127198	0.00174388	0.000783686	0.0010723	0.00109179
PE28:3	0.00101254	0.000905155	0.000935488	0.00142751	0.000778912	0.00104037	0.000975343	0.00144469	0.00103064	0.00158659	0.000532473
PE28:4	0.00423824	0.010027	0.00652198	0.0102272	0.0085093	0.00945538	0.00776236	0.00603947	0.0118031	0.00898173	0.0090319
PE28:5	0.00467567	0.0105549	0.00649006	0.00948186	0.0100203	0.00847273	0.00600271	0.00250897	0.0128973	0.00399001	0.00371612
PE28:6	0.0155307	0.0217692	0.0191693	0.034428	0.0326615	0.0286599	0.014537	0.00742432	0.0344315	0.0136205	0.0103362
PE30:0	0.000840428	0.00149756	0.00141873	0.0019382	0.0011424	0.00151234	0.00172238	0.00279107	0.000802243	0.00150928	0.00109179
PE30:1	0.00323493	0.00298271	0.00379119	0.00438588	0.00368174	0.00215015	0.00716131	0.0102368	0.00253449	0.00574132	0.00744567
PE30:3	0.00149867	0.00204032	0.00125826	0.00129619	0.000912562	0.00182138	0.00158416	0.000974522	0.00135468	0.00225048	0.000478778
PE30:4	0.00152301	0.00101271	0.00134944	0.00125363	0.0012403	0.000970233	0.00161988	0.000948877	0.00109773	0.00129919	0.000930709
PE30:6	0.00103857	0.00110538	0.00115979	0.00180931	0.000801897	0.000924936	0.00207804	0.0019234	0.00075585	0.000917669	0.00124393
PE32:0	0.00586788	0.00437188	0.00504489	0.00643959	0.00598188	0.00535089	0.00970994	0.0294536	0.00367362	0.0065884	0.00647916
PE32:1	0.00582003	0.00643206	0.0082106	0.00835104	0.00658628	0.00676752	0.0080326	0.0152461	0.00398124	0.00933468	0.00721747
PE32:2	0.00112001	0.00141482	0.0017725	0.00170839	0.00103514	0.00182065	0.00261696	0.0018892	0.00103778	0.00166054	0.00071593
PE32:5	0.00107971	0.00186657	0.00161932	0.00281367	0.00140289	0.00165261	0.000919431	0.00142759	0.000795105	0.00208408	0.00066671
PE32:6	0.00230467	0.00239444	0.00320127	0.00296931	0.00241591	0.00173371	0.00415142	0.00665069	0.0024831	0.00442364	0.00662459
PE34:0	0.00509378	0.00358835	0.0041322	0.00426428	0.00524212	0.00454066	0.00567034	0.0168319	0.00310905	0.00342865	0.003649
PE34:1	0.0309833	0.0231195	0.0387462	0.0351928	0.0368294	0.0377229	0.0259056	0.128671	0.0184816	0.0246124	0.0193995
PE34:2	0.0948181	0.0653242	0.121366	0.131148	0.100012	0.136073	0.0894799	0.155223	0.0743909	0.040038	0.0460768
PE34:3	0.00945796	0.00745636	0.0106277	0.012681	0.00754481	0.00897903	0.00778411	0.0118823	0.00538302	0.0030589	0.00449917
PE34:4	0.00124091	0.00160098	0.00094643	0.0024112	0.00139864	0.0012727	0.00116793	0.00214138	0.00100637	0.00272276	0.00100678
PE36:0	0.0122152	0.0146223	0.0152869	0.01758	0.0154582	0.0166386	0.0110658	0.0185074	0.0121614	0.0101784	0.011569
PE36:1	0.0460388	0.0271348	0.0342766	0.0395082	0.0349957	0.0424623	0.0224375	0.0512393	0.0269251	0.0182492	0.0259122
PE36:2	0.200674	0.12142	0.17258	0.22881	0.161951	0.221359	0.122067	0.2214	0.127492	0.0744623	0.103087
PE36:3	0.0927871	0.0665653	0.0831682	0.0967714	0.0896686	0.0976019	0.0522647	0.181744	0.0637819	0.0332647	0.0441438
PE36:4	0.130987	0.108853	0.115819	0.140889	0.124302	0.154144	0.0803012	0.273379	0.105818	0.0457692	0.0731926
PE36:5	0.0184667	0.0182917	0.0190891	0.0278473	0.0173327	0.021649	0.0109959	0.0406222	0.0186322	0.00730774	0.00839651
PE36:6	0.00278743	0.00613089	0.00510598	0.00756068	0.00440277	0.00459253	0.00292137	0.0064498	0.0023896	0.00517996	0.00388392
PE38:0	0.0209628	0.0222392	0.020175	0.0238834	0.0192106	0.0210448	0.0157748	0.0256368	0.0183802	0.014834	0.0177327
PE38:1	0.00932027	0.00994181	0.00958647	0.0104473	0.0075712	0.00999456	0.00732594	0.0110275	0.00721091	0.00567073	0.00776784
PE38:2	0.0135266	0.0110397	0.0115532	0.0126822	0.0104468	0.0142357	0.00893339	0.0160497	0.00848493	0.00751279	0.0083115
PE38:3	0.0567209	0.0461075	0.0507361	0.0489742	0.0523225	0.0650838	0.0405451	0.0811845	0.0494471	0.0306865	0.0312548
PE38:4	0.267222	0.205899	0.221032	0.240868	0.240624	0.318468	0.207532	0.438167	0.239431	0.14997	0.168505
PE38:5	0.188521	0.157549	0.178655	0.190419	0.175454	0.200237	0.127408	0.465373	0.153908	0.0765834	0.0910998
PE38:6	0.44849	0.43289	0.525654	0.609665	0.504995	0.680351	0.467828	0.876659	0.431842	0.161974	0.20819
PE40:0	0.0131186	0.0096605	0.00809024	0.0102272	0.00711662	0.00694359	0.00623567	0.00770214	0.00774122	0.00608082	0.00888872
PE40:1	0.00308045	0.00258639	0.00299976	0.0026021	0.00225076	0.0020201	0.00160124	0.00163703	0.00227754	0.00147567	0.00140277
PE40:2	0.00235672	0.00273118	0.00195851	0.00301309	0.00229162	0.00164384	0.0024073	0.00244913	0.00232179	0.00118994	0.00170481
PE40:3	0.00487381	0.00318542	0.00282105	0.00355783	0.00350468	0.0041929	0.00237779	0.00672335	0.00343023	0.00161348	0.00306507
PE40:4	0.0125686	0.00747373	0.0111547	0.0100558	0.00918265	0.0133904	0.00871907	0.0310736	0.00746	0.00864223	0.00932722
PE40:5	0.0502855	0.0337993	0.0494696	0.0459599	0.0437195	0.062054	0.0408619	0.134249	0.0385376	0.0250393	0.0235988
PE40:6	0.21265	0.158509	0.226059	0.226379	0.200205	0.301525	0.197914	0.431508	0.187585	0.098752	0.101367
PE42:0	0.00280003	0.00253675	0.00294506	0.00253279	0.00213158	0.00215964	0.00236847	0.0017909	0.00201988	0.00332949	0.00363334
PE42:1	0.00210905	0.00161505	0.000831545	0.00149317	0.000873403	0.00104183	0.00183886	0.00103009	0.000763701	0.0010286	0.00152135
PE42:3	0.00260776	0.0016407	0.000967401	0.00242336	0.00142418	0.00125736	0.00104057	0.00135065	0.00135111	0.00124037	0.00108508
PE42:4	0.000960489	0.000943214	0.000889899	0.00148222	0.0010079	0.00100311	0.00118967	0.00144469	0.0010392	0.00146726	0.000856878
PE42:5	0.00183786	0.00193607	0.00200045	0.00258143	0.00263638	0.00282887	0.00217433	0.00493672	0.00127402	0.00182525	0.00259525
PE42:6	0.00330378	0.00184837	0.00449691	0.00326357	0.00241761	0.00628094	0.00194137	0.00802271	0.00197849	0.00337151	0.00274291
Table S8. Lipids detected in the prediabetic mice β-Phb2 -/- versus their controls (β-Phb2 fl/fl). Lipid concentrations were calculated relative to the relevant internal standards and then normalized to the total phosphate content of each total lipid extract and expressed as percentage of total lipid amount detected.

## Sheet: Table S9
Precursor	Fragment	Ion	Standard ion	Basal1	Basal2	Basal3	Basal4	Basal5	Basal6	Basal7	Basal8	Basal9	PTX1	PTX2	PTX3	PTX4	PTX5	PTX6	PTX7	PTX8	PTX9
570.44	263,84-264,77	C8GC(-H2O)	C8GC	0.0223984	0.0178989	0.0226685		0.0228516	0.0121019		0.0174149	0.0155353	0.0329924	0.0218636	0.0282287	0.040915	0.0206119	0.0481363	0.0289067	0.0226841	0.0300848
510.49	263,84-264,77	Cer32:1	C17Cer	0.00183784	0.00103644	0.000959104		0.00347124	0.000699282		0.00135453	0.00140322	0.00125813	0.00135375	0.00114564	0.0015427	0.00192274	0.00180983	0.00143467	0.00233578	0.00188732
492.48	263,84-264,77	Cer32:1(-H2O)	C17Cer	0.00220719	0.00171769	0.00141225		0.00283457	0.00115774		0.00154178	0.00198488	0.00235866	0.00213915	0.0025539	0.00268125	0.00304837	0.00307095	0.00160381	0.00299054	0.00273227
538.52	263,84-264,77	Cer34:1	C17Cer	0.0226198	0.0208034	0.0160506		0.0236081	0.0203413		0.018795	0.0227422	0.0287785	0.0375134	0.0260908	0.0341242	0.0284806	0.0370867	0.0295033	0.0300807	0.0343996
520.51	263,84-264,77	Cer34:1(-H2O)	C17Cer	0.0254689	0.0221712	0.021532		0.0210253	0.0119094		0.0131074	0.0334515	0.0352051	0.054881	0.0384391	0.0259505	0.0300279	0.0388518	0.0472954	0.0297962	0.0329806
566.55	263,84-264,77	Cer36:1	C17Cer	0.00925094	0.00562788	0.00608497		0.00979418	0.00770782		0.00785182	0.0054704	0.00988762	0.0112186	0.00858162	0.0131225	0.0115755	0.0167297	0.0206271	0.0191626	0.016919
548.54	263,84-264,77	Cer36:1(-H2O)	C17Cer	0.00648305	0.00440829	0.00407589		0.00428864	0.0040252		0.00570311	0.00623239	0.00941391	0.0123238	0.0105387	0.0105414	0.00852291	0.0141154	0.017968	0.0147332	0.0102972
594.58	263,84-264,77	Cer38:1	C17Cer	0.00816904	0.00672466	0.00548446		0.0080687	0.00762061		0.00844369	0.00482836	0.0092536	0.00973298	0.00669459	0.0112019	0.00812827	0.0128235	0.0126195	0.0155026	0.0104872
576.57	263,84-264,77	Cer38:1(-H2O)	C17Cer	0.00521759	0.00343749	0.0040151		0.00560446	0.00393798		0.00359869	0.00385383	0.00721376	0.00882445	0.00458773	0.00647482	0.00521643	0.00790056	0.00757869	0.00898019	0.00576107
622.61	263,84-264,77	Cer40:1	C17Cer	0.0372897	0.0356337	0.0347071		0.0478212	0.0459656		0.0346415	0.0205645	0.0398801	0.0351934	0.0194044	0.0339442	0.0286861	0.0385231	0.0397182	0.0450683	0.0329211
604.6	263,84-264,77	Cer40:1(-H2O)	C17Cer	0.0241066	0.0207578	0.0147881		0.0224198	0.0236287		0.017708	0.0128898	0.0212333	0.0224891	0.0142206	0.0182764	0.0189629	0.0211142	0.0233654	0.0308844	0.0212561
620.6	263,84-264,77	Cer40:2	C17Cer	0.00397327	0.00348672	0.00243583		0.0042043	0.0029362		0.00290818	0.00210805	0.00448856	0.00459049	0.00272431	0.00533746	0.0035319	0.00648468	0.00395582	0.00665912	0.00438998
602.59	263,84-264,77	Cer40:2(-H2O)	C17Cer	0.0026049	0.00291557	0.000812967		0.00366402	0.00264667		0.00157831	0.00209799	0.00341775	0.00421937	0.00297808	0.00397359	0.00350914	0.00559959	0.00359315	0.00530976	0.00351033
650.65	263,84-264,77	Cer42:1	C17Cer	0.14288	0.149847	0.0947076		0.173024	0.11111		0.103112	0.0859955	0.071418	0.121357	0.0446129	0.0822615	0.0796209	0.0821341	0.0681929	0.0990898	0.0772157
632.63	263,84-264,77	Cer42:1(-H2O)	C17Cer	0.0754087	0.0909502	0.049392		0.0897317	0.0622298		0.0591688	0.0458559	0.0408915	0.0721618	0.0295624	0.051938	0.0418701	0.0395194	0.0491918	0.0649537	0.0448909
630.62	263,84-264,77	Cer42:2(-H2O)	C17Cer	0.0580888	0.0593902	0.0375856		0.0702016	0.0502269		0.0429076	0.0455089	0.0728391	0.109745	0.0500195	0.0627274	0.0598026	0.0759142	0.0720779	0.0887535	0.0726052
678.68	263,84-264,77	Cer44:1	C17Cer	0.00616766	0.00811734	0.0103752		0.00875737	0.00522144		0.00458286	0.0063133	0.00932205	0.00802329	0.00683402	0.00956022	0.0121202	0.00908494	0.00627735	0.00924197	0.00861889
590.45	263,84-264,77	CerP32:1	C17Cer	0.117732	0.10581	0.0460456		0.0273799	0.0290198		0.0429816	0.0549169	0.0740919	0.0786994	0.0773039	0.160708	0.13535	0.155928	0.102953	0.0318598	0.102547
600.48	263,84-264,77	CerP34:1(-H2O)	C17Cer	0.00347821	0.00266573	0.00256048		0.00403435	0.00179063		0.00221128	0.00178724	0.00207047	0.00270049	0.00186268	0.00223656	0.00195758	0.00294944	0.00166019	0.00279803	0.0020203
628.51	263,84-264,77	CerP36:1(-H2O)	C17Cer	0.00510023	0.00491275	0.0053813		0.0077789	0.00381816		0.00407776	0.00480703	0.00547471	0.00916522	0.00546559	0.00653085	0.00567293	0.00866286	0.00711164	0.00993718	0.00622774
700.99	252,79-253,72	CL68:3_C16:1	CL56:0	0.00368791	0.00648381	0.00536411		0.00294618	0.00191478		0.00537475	0.00480501	0.0105054	0.00474162	0.00989619	0.0133955	0.00615006	0.0166044	0.0107894	0.00699202	0.0106119
700.99	278,80-279,73	CL68:3_C18:2	CL56:0	0.0114481	0.0230536	0.0172436		0.00481877	0.00466005		0.0118903	0.0129663	0.0207362	0.00859338	0.00852187	0.029216	0.0114305	0.0268391	0.0186774	0.0144966	0.0293207
699.99	278,80-279,73	CL68:4_C18:2	CL56:0	0.0107211	0.00646052	0.00730381		0.00291828	0.00298688		0.00529163	0.00560846	0.0060592	0.00553461	0.00559911	0.0133276	0.00661866	0.00749511	0.00732116	0.00719004	0.0125959
698.98	254,80-255,73	CL68:5_C16:0	CL56:0	0.00412012	0.00444482	0.00492876		0.00205015	0.00151799		0.00266157	0.00403054	0.00190836	0.00333244	0.00419233	0.00516936	0.00350274	0.00442544	0.00500725	0.00224076	0.00672496
698.98	252,79-253,72	CL68:5_C16:1	CL56:0	0.0064875	0.00908761	0.00733819		0.00578202	0.00230488		0.00535374	0.00677782	0.0125038	0.00426197	0.0119691	0.0151755	0.00847527	0.0163089	0.0137494	0.00661008	0.0119921
698.98	278,80-279,73	CL68:5_C18:2	CL56:0	0.0182416	0.0412637	0.0193043		0.0081765	0.00637761		0.0177217	0.0194712	0.0180119	0.0133082	0.0134932	0.0444165	0.0167344	0.0332356	0.0332428	0.0212415	0.0438692
716.02	254,80-255,73	CL70:2_C16:0	CL56:0	0.0103256	0.018073	0.0162071		0.015748	0.0236448		0.0222685	0.0221308	0.0396955	0.0358492	0.0285783	0.0270676	0.0173509	0.0298014	0.0302858	0.0458837	0.0204161
716.02	280,82-281,75	CL70:2_C18:1	CL56:0	0.00247975	0.00306908	0.00471447		0.00135007	0.00193246		0.00221448	0.00144871	0.00427332	0.00164667	0.00362651	0.00541376	0.00154658	0.00503426	0.00406477	0.00358153	0.00445688
715.01	254,80-255,73	CL70:3_C16:0	CL56:0	0.00758609	0.0172473	0.00954868		0.00355812	0.0039427		0.00860673	0.0147528	0.0158523	0.00890323	0.00650279	0.030531	0.00934633	0.0208239	0.015885	0.00990714	0.0241527
715.01	280,82-281,75	CL70:3_C18:1	CL56:0	0.00639572	0.00823485	0.0058541		0.006848	0.0114046		0.00928947	0.0089068	0.0140862	0.0113382	0.0123999	0.0108645	0.00712494	0.012239	0.01384	0.018536	0.00943328
714	254,80-255,73	CL70:4_C16:0	CL56:0	0.0065943	0.0171356	0.0140562		0.0231661	0.0183526		0.0144797	0.0134928	0.0245907	0.0328039	0.0262967	0.0145126	0.0155945	0.0197175	0.0263315	0.0403557	0.0101172
714	280,82-281,75	CL70:4_C18:1	CL56:0	0.00619325	0.0136637	0.00898316		0.00819046	0.00472408		0.00646532	0.00712923	0.0194168	0.00814408	0.0143423	0.0225468	0.0082136	0.0151296	0.0152869	0.0106962	0.0131228
714	278,80-279,73	CL70:4_C18:2	CL56:0	0.00303154	0.00319241	0.00426869		0.000778715	0.00151524		0.00322375	0.00416338	0.00235866	0.00348357	0.00395184	0.00668822	0.00203722	0.00688246	0.00569144	0.00374951	0.00800685
712.99	254,80-255,73	CL70:5_C16:0	CL56:0	0.00180947	0.00307278	0.00337467		0.00197405	0.00123907		0.0020592	0.00207746	0.0030377	0.00294907	0.00435978	0.00787803	0.00268856	0.00536809	0.0060084	0.00298134	0.00504248
712.99	252,79-253,72	CL70:5_C16:1	CL56:0	0.00595573	0.00757106	0.00682671		0.00400899	0.00176196		0.00735358	0.00646304	0.0115204	0.00280786	0.00812056	0.0188653	0.00726574	0.0150989	0.0103139	0.00802626	0.0144972
712.99	280,82-281,75	CL70:5_C18:1	CL56:0	0.0034949	0.00985408	0.00588848		0.00761022	0.00703997		0.00632557	0.00494389	0.0117636	0.0140574	0.0112904	0.00948869	0.00766963	0.0106863	0.0111596	0.0158888	0.00702148
712.99	278,80-279,73	CL70:5_C18:2	CL56:0	0.00969593	0.0124118	0.0105072		0.00361963	0.00492641		0.0115336	0.019569	0.0212612	0.0150534	0.00911866	0.0277794	0.00904413	0.0213521	0.0235292	0.00885941	0.0348646
711.99	252,79-253,72	CL70:6_C16:1	CL56:0	0.00321789	0.00515571	0.00631584		0.00305335	0.00112946		0.00233458	0.00191685	0.00280445	0.00360377	0.00341184	0.00947915	0.00294171	0.00446893	0.00431163	0.0037115	0.00335174
711.99	278,80-279,73	CL70:6_C18:2	CL56:0	0.00216825	0.0054749	0.00358405		0.000724179	0.00106464		0.00237614	0.00268086	0.00204885	0.00272267	0.00230383	0.00982727	0.00219081	0.00503298	0.00545144	0.00238973	0.00755423
710.98	252,79-253,72	CL70:7_C16:1	CL56:0	0.00291028	0.00542356	0.00655961		0.00290686	0.00120646		0.00210304	0.00453934	0.00557738	0.00375665	0.00490273	0.00936232	0.00363642	0.00504449	0.00564878	0.00201944	0.00620461
721.97	252,79-253,72	CL72:10_C16:1	CL56:0	0.0132843	0.0051446	0.0105244		0.00659371	0.00476062		0.00462807	0.00843906	0.00434897	0.00709084	0.0111392	0.00599079	0.00463193	0.00557912	0.00687164	0.00393895	0.00569004
727.01	282,83-283,76	CL72:5_C18:0	CL56:0	0.00756106	0.00563952	0.00553788		0.0028574	0.00407705		0.00409785	0.00717914	0.00745692	0.00782956	0.00475224	0.00994053	0.00492844	0.00678269	0.00828497	0.00423322	0.0106276
727.01	280,82-281,75	CL72:5_C18:1	CL56:0	0.0095146	0.0158461	0.0100067		0.00453215	0.0037828		0.00783812	0.00676172	0.0172311	0.00552236	0.0110876	0.0270378	0.00879241	0.0194681	0.0170301	0.0106667	0.0174897
727.01	278,80-279,73	CL72:5_C18:2	CL56:0	0.00822021	0.0144492	0.00950201		0.0051593	0.00404995		0.00775866	0.00984309	0.0146428	0.00997864	0.0105424	0.0357432	0.00928874	0.0233602	0.0196412	0.0113491	0.0255767
726	278,80-279,73	CL72:6_C18:2	CL56:0	0.00739975	0.00538333	0.00731609		0.00341607	0.00206642		0.0043504	0.00501393	0.00793603	0.00583337	0.00733934	0.0109873	0.00318632	0.00804765	0.00490058	0.00475187	0.0104467
724.99	280,82-281,75	CL72:7_C18:1	CL56:0	0.00997461	0.00492069	0.0083544		0.00797358	0.00461212		0.00389508	0.0086198	0.00659865	0.00748763	0.00517863	0.00539588	0.00524203	0.00421312	0.00358858	0.0022193	0.00493015
724.99	278,80-279,73	CL72:7_C18:2	CL56:0	0.0157991	0.0260088	0.0216732		0.00650303	0.00577104		0.0125539	0.0149025	0.0189395	0.0138071	0.0155698	0.042069	0.0116374	0.0294778	0.0273906	0.0182301	0.0371137
723.99	278,80-279,73	CL72:8_C18:2	CL56:0	0.00700982	0.00276471	0.010832		0.00527788	0.0012206		0.00218662	0.00345653	0.010727	0.00781964	0.00785425	0.0150169	0.0039884	0.00663944	0.00463468	0.00257856	0.00639706
722.98	252,79-253,72	CL72:9_C16:1	CL56:0	0.00674393	0.00570622	0.00400098		0.00419986	0.00273388		0.00754721	0.00917127	0.013662	0.00526561	0.00825261	0.0172105	0.00669759	0.0229407	0.0122256	0.00998316	0.0150159
722.98	276,79-277,72	CL72:9_C18:3	CL56:0	0.00364286	0.00288275	0.00458798		0.00264053	0.00104539		0.00295979	0.00366062	0.00172824	0.00321515	0.0048865	0.00957214	0.00313583	0.00699117	0.00602059	0.00222849	0.00741877
722.98	302,80-303,73	CL72:9_C20:4	CL56:0	0.0112061	0.00419656	0.0121865		0.00458161	0.00160599		0.0029671	0.00346982	0.00940851	0.00660419	0.0052133	0.00762171	0.00359803	0.00402766	0.00210439	0.00105754	0.0035318
735.99	278,80-279,73	CL74:10_C18:2	CL56:0	0.0034376	0.00522717	0.00597813		0.00207678	0.00127364		0.00236153	0.00393514	0.00401845	0.00425964	0.00422184	0.00951492	0.00424866	0.00631201	0.00460496	0.00369801	0.00863871
735.99	326,80-327,73	CL74:10_C22:6	CL56:0	0.00287413	0.0032247	0.00392791		0.00289735	0.00106896		0.00155959	0.00256775	0.00449577	0.00350807	0.00226546	0.00656423	0.00155085	0.00406859	0.00355353	0.00232904	0.0052531
741.03	278,80-279,73	CL74:5_C18:2	CL56:0	0.0113663	0.0180423	0.0159646		0.00646562	0.00525287		0.0109107	0.0124535	0.0185603	0.0124329	0.0109002	0.0289131	0.0128512	0.0248771	0.0184686	0.0168869	0.0296982
740.02	278,80-279,73	CL74:6_C18:2	CL56:0	0.00704431	0.0105782	0.0102904		0.00784993	0.00516762		0.00873734	0.00777609	0.0174265	0.0108061	0.0158553	0.0123774	0.00669261	0.0112759	0.00890669	0.011964	0.0140554
740.02	308,85-309,78	CL74:6_C20:1	CL56:0	0.00332246	0.0059296	0.00890457		0.00514852	0.00369245		0.0048249	0.00537942	0.00680219	0.0091378	0.00982242	0.0101158	0.00427852	0.00808346	0.00630326	0.00812496	0.00842066
739.01	278,80-279,73	CL74:7_C18:2	CL56:0	0.01293	0.0345533	0.0170005		0.00501789	0.00443062		0.0133713	0.0159044	0.0114853	0.00926442	0.00664664	0.0365492	0.00752172	0.0294803	0.0218782	0.0172486	0.0392306
739.01	308,85-309,78	CL74:7_C20:1	CL56:0	0.00687576	0.0101722	0.0162262		0.0153067	0.0105694		0.0108112	0.012439	0.0310705	0.0235465	0.0272114	0.0134313	0.0149197	0.0147574	0.00996422	0.0211404	0.0133434
738	306,83-307,76	CL74:8_C20:2	CL56:0	0.00200249	0.00430984	0.00392545		0.00166587	0.0010006		0.00151163	0.0026406	0.00220195	0.00193318	0.003822	0.0093039	0.00211971	0.0046045	0.00414858	0.0012574	0.00633841
736.99	278,80-279,73	CL74:9_C18:2	CL56:0	0.00680067	0.00694274	0.0065897		0.00252068	0.00390223		0.00760612	0.0099075	0.00974353	0.00645072	0.00615903	0.0307742	0.00761416	0.0150695	0.0104038	0.00985442	0.0178159
736.99	304,82-305,75	CL74:9_C20:3	CL56:0	0.00280181	0.00322682	0.00415387		0.00351563	0.00082696		0.00132942	0.00227752	0.00232443	0.00411959	0.00454126	0.00562478	0.00254777	0.0026834	0.001232	0.00160807	0.0038341
750	280,82-281,75	CL76:10_C18:1	CL56:0	0.0151766	0.00779074	0.0197132		0.00838894	0.0102716		0.00731339	0.0129929	0.0103938	0.0141472	0.0154009	0.0127482	0.00722734	0.00839683	0.0071284	0.00511726	0.00425369
748.99	278,80-279,73	CL76:11_C18:2	CL56:0	0.0124176	0.0118666	0.0199453		0.0028295	0.00994513		0.0131973	0.0147942	0.0122463	0.0108988	0.0126522	0.0520263	0.0162245	0.0448415	0.0344793	0.019268	0.0382279
751.01	280,82-281,75	CL76:9_C18:1	CL56:0	0.00789481	0.00886899	0.0104574		0.00373314	0.00468598		0.00703983	0.00843947	0.0162854	0.00597866	0.00976931	0.0223155	0.012084	0.0259387	0.0238995	0.0104221	0.0203797
751.01	278,80-279,73	CL76:9_C18:2	CL56:0	0.0131591	0.0151051	0.0189273		0.00425503	0.007269		0.0101015	0.0166028	0.0129541	0.00967871	0.0151147	0.0407922	0.0174021	0.0354931	0.0366675	0.0172823	0.037862
762	306,83-307,76	CL78:12_C20:2	CL56:0	0.00138561	0.00561306	0.0029031		0.00361456	0.00734011		0.00447645	0.00351047	0.0018174	0.00729623	0.00194457	0.00289823	0.00235152	0.00720605	0.0106507	0.00916043	0.00485995
771.99	326,80-327,73	CL80:14_C22:6	CL56:0	0.0265814	0.034168	0.0148741		0.0261047	0.0109174		0.0117026	0.0163206	0.0558314	0.0127544	0.0141785	0.0616532	0.0273358	0.0255435	0.0604002	0.0878836	0.0396989
436.42	265,85-266,78	DHCer28:1(-H2O)	C17Cer	0.00185119	0.0018082	0.000779196		0.00289164	0.000872532		0.000577709	0.000846925	0.00100416	0.00125572	0.00134703	0.00213165	0.00211828	0.00179576	0.00146515	0.003904	0.00249275
522.52	265,85-266,78	DHCer34:0(-H2O)	C17Cer	0.0022706	0.00139162	0.00106656		0.00234756	0.00137381		0.00120748	0.002195	0.00186963	0.00239123	0.00205522	0.00254415	0.00299646	0.00382558	0.00274439	0.00467401	0.00296107
568.57	265,85-266,78	DHCer36:0	C17Cer	0.00176219	0.00199612	0.000957262		0.00480672	0.00155689		0.00147601	0.00157591	0.00133828	0.00202712	0.00169523	0.00246308	0.00244538	0.0031656	0.00386287	0.00477272	0.00363174
550.56	265,85-266,78	DHCer36:0(-H2O)	C17Cer	0.00185508	0.00199135	0.000790248		0.00213449	0.00126696		0.00133444	0.00197119	0.00146256	0.00265031	0.00150933	0.00282789	0.00221499	0.00312467	0.0023802	0.0032002	0.00269345
576.57	265,85-266,78	DHCer38:1(-H2O)	C17Cer	0.000524541	0.00083476	0.000241311		0.00132978	0.000481248		0.000250721	0.000572399	0.000512438	0.000591098	0.000989251	0.00093349	0.000880308	0.00128287	0.000816002	0.00169513	0.00090773
606.62	265,85-266,78	DHCer40:0(-H2O)	C17Cer	0.00732466	0.00924693	0.00219575		0.00751193	0.00401616		0.00370282	0.0041195	0.00472181	0.0077467	0.00392086	0.00758833	0.00474214	0.00665479	0.00397792	0.00730652	0.00582136
604.6	265,85-266,78	DHCer40:1(-H2O)	C17Cer	0.00197412	0.00257997	0.0014798		0.00213069	0.00190967		0.00163814	0.00157671	0.001513	0.0023358	0.0014599	0.00191467	0.00237854	0.00196203	0.00207315	0.00429453	0.00200873
634.65	265,85-266,78	DHCer42:0(-H2O)	C17Cer	0.00893944	0.0124595	0.00495947		0.00925073	0.0053499		0.00390285	0.00556781	0.00316919	0.0108131	0.002818	0.00616842	0.00326169	0.00441649	0.00324649	0.00679951	0.00496154
632.63	265,85-266,78	DHCer42:1(-H2O)	C17Cer	0.00560975	0.0101971	0.00272197		0.00617962	0.00482387		0.00379964	0.00432117	0.00448496	0.0109047	0.00295669	0.00643548	0.00309885	0.00443567	0.00345753	0.0111676	0.00551411
660.67	265,85-266,78	DHCer44:1(-H2O)	C17Cer	0.00170323	0.00171345	0.000722091		0.000341797	0.00115224		0.00104718	0.00135049	0.00146076	0.00150955	0.00115966	0.00131618	0.00153307	0.00205028	0.00172724	0.00288877	0.0018931
616.48	263,84-264,77	GlcCer28:1	C8GC	0.000779858	0.000901985	0.000665601		0.000992417	0.000650568		0.000720196	0.000691548	0.00153461	0.00114543	0.000751712	0.00152005	0.000925816	0.0015489	0.00161753	0.0014309	0.00103988
598.47	263,84-264,77	GlcCer28:1(-H2O)	C8GC	0.000278123	0.000203264	0.000236399		0.000180728	0.000180321		0.000196375	0.000320012	0.000493525	0.000247409	0.000192539	0.000615173	0.000307894	0.000454055	0.000402287	0.000660885	0.00040472
596.45	263,84-264,77	GlcCer28:2(-H2O)	C8GC	0.000309273	0.000304896	0.000303942		0.000270775	0.000370855		0.000258485	0.000510812	0.000948325	0.000385701	0.000316472	0.00079281	0.000753737	0.0010002	0.000924955	0.000865036	0.000711977
626.5	263,84-264,77	GlcCer30:1(-H2O)	C8GC	0.000580165	0.000666961	0.000585164		0.000410918	0.000534283		0.000433396	0.000530938	0.00125543	0.000941205	0.000559911	0.00150574	0.000607967	0.00113578	0.00106515	0.00143335	0.00110926
624.48	263,84-264,77	GlcCer30:2(-H2O)	C8GC	0.000646359	0.00058809	0.000650251		0.000566914	0.000449034		0.000555332	0.000625131	0.00119059	0.00063311	0.000558436	0.00102529	0.000438021	0.00104369	0.00107429	0.00105693	0.000656638
654.53	263,84-264,77	GlcCer32:1(-H2O)	C8GC	0.000413847	0.000391178	0.000439641		0.000485746	0.000364177		0.000471758	0.000415412	0.000702463	0.000530412	0.000359996	0.000755852	0.000500595	0.00085567	0.000601144	0.000987649	0.000724367
652.52	263,84-264,77	GlcCer32:2(-H2O)	C8GC	0.00159921	0.00166899	0.00256539		0.00140143	0.00126028		0.00146597	0.00134767	0.0022686	0.00173361	0.000928759	0.00145448	0.000971325	0.00228563	0.00146286	0.00192809	0.00157263
682.56	263,84-264,77	GlcCer34:1(-H2O)	C8GC	0.00406728	0.0050472	0.00503438		0.00382192	0.0031177		0.00340826	0.00624245	0.00923649	0.0085998	0.00507461	0.00876741	0.00573906	0.00767545	0.00625754	0.00762347	0.0121887
680.55	263,84-264,77	GlcCer34:2(-H2O)	C8GC	0.000285355	0.000458403	0.000462974		0.000341797	0.000368498		0.00021373	0.000478207	0.000905998	0.000504154	0.000444831	0.000916799	0.000457931	0.000946482	0.000457906	0.000842966	0.000734278
710.59	263,84-264,77	GlcCer36:1(-H2O)	C8GC	0.000983444	0.00130057	0.00101191		0.000505404	0.00066314		0.000575426	0.000925016	0.00214071	0.00165309	0.00115081	0.00185148	0.00114269	0.00285607	0.00171429	0.00269565	0.00362018
708.58	263,84-264,77	GlcCer36:2(-H2O)	C8GC	0.00024308	0.000289016	0.00022289		0.000285994	0.000192106		0.000187698	0.000288212	0.00048452	0.000515825	0.000259669	0.000407731	0.00028514	0.000370918	0.000329144	0.000616131	0.00044354
738.62	263,84-264,77	GlcCer38:1(-H2O)	C8GC	0.000861626	0.000910984	0.00085165		0.000512379	0.000763711		0.000723392	0.00086987	0.00140763	0.00159707	0.00081958	0.00138652	0.000934349	0.00205668	0.00121753	0.00231187	0.00239363
736.61	263,84-264,77	GlcCer38:2(-H2O)	C8GC	0.000470028	0.000393295	0.000576568		0.00037287	0.000289141		0.000340689	0.000499944	0.000689855	0.000586429	0.00051565	0.000532912	0.000487796	0.000896599	0.000657526	0.000900594	0.000827612
766.66	263,84-264,77	GlcCer40:1(-H2O)	C8GC	0.0054145	0.00577556	0.00606962		0.00300515	0.00436148		0.00326349	0.00503083	0.00799547	0.00630951	0.00457888	0.00570943	0.00433327	0.00598841	0.00546516	0.00672656	0.0111298
764.64	263,84-264,77	GlcCer40:2(-H2O)	C8GC	0.00039271	0.000396471	0.000375168		0.000228288	0.000401498		0.000307807	0.000528121	0.000751996	0.0012032	0.000482453	0.00116001	0.000608678	0.00140437	0.000624764	0.000764493	0.00129263
794.69	263,84-264,77	GlcCer42:1(-H2O)	C8GC	0.00921812	0.00775951	0.00770354		0.00376865	0.00669897		0.00515691	0.00873895	0.0117654	0.0102756	0.00637296	0.00728432	0.00714414	0.00710756	0.0058964	0.0119983	0.0150292
792.67	263,84-264,77	GlcCer42:2(-H2O)	C8GC	0.0104001	0.0114945	0.00988946		0.00485619	0.00805746		0.00641782	0.0113216	0.0214143	0.021814	0.0150158	0.0119518	0.00977084	0.0167783	0.0104069	0.0188205	0.0309025
820.7	263,84-264,77	GlcCer44:2(-H2O)	C8GC	0.000208036	0.000298544	0.000385607		0.000381114	0.000273034		0.000284973	0.000377172	0.000534052	0.000512907	0.000226473	0.000438728	0.000293673	0.000267317	0.000290287	0.000818443	0.000405546
600.48	265,85-266,78	GlcDHCer28:0(-H2O)	C8GC	0.00140341	0.000805117	0.00106226		0.000918858	0.000718532		0.000869989	0.000913343	0.000861868	0.00132282	0.00137507	0.00179306	0.000972747	0.00128542	0.000838098	0.00110474	0.000807789
712.61	265,85-266,78	GlcDHCer36:0(-H2O)	C8GC	0.000151855	0.0001588	0.000114208		2.72677e-05	6.16783e-05		6.07394e-05	0.000159	0.00025757	0.000165717	0.00022426	0.000268244	0.000272341	0.000397778	0.000196572	0.000968031	0.000389853
740.64	265,85-266,78	GlcDHCer38:0(-H2O)	C8GC	9.01119e-05	8.83988e-05	8.84194e-05		0.00014268	7.93568e-05		9.54476e-05	9.98277e-05	0.000138691	0.000163383	0.000199916	0.00014664	0.000168524	0.000194412	0.000149334	0.000743036	0.000225487
768.67	265,85-266,78	GlcDHCer40:0(-H2O)	C8GC	0.000134055	0.000114336	0.000164558		0.000147119	0.000157928		0.000123762	0.000216964	0.000298997	0.000182056	0.000152703	0.000222941	9.38615e-05	0.000372197	0.000266667	0.000960674	0.000348555
766.66	265,85-266,78	GlcDHCer40:1(-H2O)	C8GC	0.000130718	0.000172034	5.2192e-05		6.78522e-05	7.62139e-05		5.9826e-05	0.000106268	0.000145896	0.000267832	4.27864e-05	0.000191944	5.68858e-05	0.000101043	0.000182858	0.000319407	0.000260177
796.7	265,85-266,78	GlcDHCer42:0(-H2O)	C8GC	0.000394935	0.000553154	0.00042736		0.000110339	0.000198785		0.000253005	0.000309546	0.0003035	0.000410792	0.00022426	0.000361235	0.000252431	0.000282665	0.000175239	0.00818075	0.000460885
794.69	265,85-266,78	GlcDHCer42:1(-H2O)	C8GC	0.000328185	0.000311778	0.000211838		0.000309457	0.000258892		0.000183132	0.000470961	0.000655632	0.000619106	0.00037475	0.000404155	0.000312161	0.00060626	0.000236953	0.00327132	0.000792921
468.309	183,65-184,57	LysoPC14:0	DLPC	0.0163331	0.0099303	0.0159173		0.0115621	0.0102681		0.0141473	0.00822371	0.010727	0.0108516	0.0110972	0.0107047	0.00503368	0.00300956	0.00316268	0.00978882	0.00383906
496.34	183,65-184,57	LysoPC16:0	DLPC	1.76161	2.08872	2.28651		1.3349	1.00644		0.944121	0.645863	0.62252	2.22444	2.13681	1.66054	1.18757	0.493047	0.694118	0.731652	0.641426
494.325	183,65-184,57	LysoPC16:1	DLPC	0.0473922	0.0479566	0.0658454		0.0207203	0.036046		0.0242076	0.0252689	0.0242179	0.0551121	0.0496654	0.0316325	0.0260942	0.0158817	0.011181	0.0224069	0.0258674
524.372	183,65-184,57	LysoPC18:0	DLPC	0.407377	0.551408	0.599268		0.31569	0.220273		0.219408	0.191426	0.144116	0.463217	0.480566	0.565605	0.230397	0.159003	0.128791	0.220517	0.224926
522.356	183,65-184,57	LysoPC18:1	DLPC	0.664433	0.599365	0.584504		0.414433	0.317024		0.272363	0.281672	0.32004	0.726755	0.489962	0.436338	0.390705	0.285066	0.224801	0.267265	0.418908
520.659	183,65-184,57	LysoPC18:2	DLPC	0.189705	0.235327	0.320399		0.498635	0.0763153		0.107641	0.120236	0.1262	0.206885	0.164877	0.108567	0.194854	0.0980389	0.111673	0.092069	0.158004
552.403	183,65-184,57	LysoPC20:0	DLPC	0.00293253	0.00145726	0.00288468		0.00126002	0.000951888		0.000663566	0.000754746	0.000908699	0.00267073	0.00186047	0.00253342	0.000787157	0.000684281	0.000441906	0.000496583	0.000678113
550.387	183,65-184,57	LysoPC20:1	DLPC	0.00650642	0.00486405	0.00794178		0.00263989	0.00130703		0.00138879	0.00169425	0.00210649	0.0100446	0.00790958	0.0116585	0.00468099	0.00275759	0.00186286	0.00171229	0.00319977
548.372	183,65-184,57	LysoPC20:2	DLPC	0.00697088	0.00532351	0.00820212		0.00388216	0.00233317		0.00241359	0.00255768	0.00371135	0.00853853	0.00590378	0.00813912	0.00376797	0.00175099	0.00239696	0.00278025	0.00256791
580.434	183,65-184,57	LysoPC22:0	DLPC	0.00063579	0.000883988	0.000566129		0.00116617	0.00064664		0.00044116	0.000627546	0.000830348	0.000877602	0.000711877	0.0004888	0.000503439	0.000628003	0.000400001	0.000504553	0.000517877
578.419	183,65-184,57	LysoPC22:1	DLPC	0.000372685	0.000331892	0.000464816		0.000321505	0.000288356		0.000186785	0.000228235	0.000291792	0.000907361	0.000409421	0.00060802	0.000241054	0.000396499	0.000276572	0.00023787	0.00041711
426.262	284,81-285,74	LysoPE14:0	PE31:1	0.00113474	0.00112431	0.00158357		0.00245029	0.000765282		0.00114354	0.00104819	0.00274411	0.00257854	0.00136916	0.00230928	0.00164898	0.00155402	0.00240763	0.00172823	0.00168909
424.246	282,80-283,73	LysoPE14:1	PE31:1	0.00412624	0.00369846	0.00589217		0.007647	0.00266238		0.00379827	0.00264825	0.00847369	0.00767377	0.00370028	0.00501795	0.00476561	0.00733267	0.00695773	0.00494315	0.00459151
422.231	280,78-281,71	LysoPE14:2	PE31:1	0.000398273	0.000398059	0.00124217		0.00133231	0.000481641		0.000627945	0.0006203	0.00142924	0.0011396	0.000689008	0.000604443	0.000628588	0.000581958	0.00103467	0.00049597	0.000424543
454.293	312,85-313,77	LysoPE16:0	PE31:1	0.0281544	0.0318447	0.03087		0.0330478	0.0172691		0.017951	0.0128415	0.0337552	0.0483125	0.0327323	0.0522742	0.0440744	0.0290647	0.0208496	0.0368103	0.0211371
452.278	310,83-311,76	LysoPE16:1	PE31:1	0.00205922	0.00229307	0.0029338		0.00263419	0.00288474		0.00233869	0.00256855	0.00689585	0.00535897	0.00326357	0.00323085	0.00307325	0.00327176	0.00220801	0.00574014	0.00351363
450.262	308,81-309,74	LysoPE16:2	PE31:1	0.000518422	0.000727305	0.00124094		0.00140143	0.000546855		0.000495506	0.000732606	0.00176156	0.00890731	0.00046106	0.00148905	0.000883152	0.00101939	0.0013341	0.000822121	0.000791269
482.325	340,88-341,81	LysoPE18:0	PE31:1	0.048063	0.0262989	0.0558123		0.0343751	0.0167062		0.0179579	0.0140906	0.0275582	0.0593548	0.0507351	0.0832451	0.038939	0.0293294	0.0178766	0.0326727	0.024939
480.309	338,86-339,79	LysoPE18:1	PE31:1	0.0399485	0.027916	0.0418457		0.0464819	0.0189168		0.0217301	0.0239953	0.0682443	0.0596174	0.0564419	0.0688541	0.0580711	0.043001	0.0218241	0.0442885	0.0579667
478.293	336,85-337,77	LysoPE18:2	PE31:1	0.0279942	0.0439236	0.043735		0.117793	0.0193894		0.0265577	0.0256738	0.0697915	0.070256	0.0612627	0.0334626	0.0802872	0.0427042	0.0290264	0.0515533	0.0481328
510.356	368,91-369,84	LysoPE20:0	PE31:1	0.0014023	0.000988266	0.00162471		0.00124544	0.000524855		0.000656716	0.000729789	0.00109872	0.00161399	0.0010763	0.00179902	0.000894529	0.000519286	0.0011741	0.000542563	0.000759057
508.34	366,89-367,82	LysoPE20:1	PE31:1	0.00214656	0.00165787	0.00297064		0.00222707	0.000788068		0.000828887	0.00114158	0.0024307	0.00348648	0.00292275	0.00474852	0.00190638	0.0016039	0.00145296	0.00125249	0.00195835
506.325	364,88-365,81	LysoPE20:2	PE31:1	0.00170267	0.0017161	0.00282082		0.00229112	0.00102771		0.00117232	0.00125429	0.00260182	0.00252661	0.00200801	0.00319866	0.00131619	0.000915785	0.00148496	0.00147565	0.0016098
538.387	396,94-397,87	LysoPE22:0	PE31:1	0.000970094	0.00228461	0.00249539		0.00206981	0.00104814		0.00121342	0.00131386	0.0030314	0.00197811	0.00178301	0.00295545	0.00151956	0.00189552	0.00166934	0.0019753	0.00186006
536.372	394,92-395,85	LysoPE22:1	PE31:1	0.000828251	0.00123017	0.00114945		0.00139256	0.000519355		0.000650779	0.000671019	0.00125903	0.000888105	0.00104384	0.00189202	0.000641387	0.000810904	0.000957717	0.000916533	0.000582302
534.356	392,91-393,84	LysoPE22:2	PE31:1	0.000576271	0.000770181	0.00176286		0.00166587	0.000774318		0.000812446	0.00110213	0.00202183	0.00272208	0.000991464	0.00219841	0.000967769	0.00105136	0.000953145	0.000788403	0.00123894
543.257	240,58-241,51	LysoPI14:0	PI31:1	0.0119415	0.0591684	0.0362347		0.0261719	0.0289106		0.00567845	0.0111143	0.0117627	0.0123156	0.0155698	0.0173262	0.0137642	0.0232668	0.0180679	0.0291458	0.0254329
541.241	240,58-241,51	LysoPI14:1	PI31:1	0.0416022	0.0421816	0.0472945		0.0340497	0.014901		0.0337222	0.0308484	0.0538816	0.03364	0.0369741	0.0747042	0.0426757	0.0688105	0.0748215	0.0690717	0.0556763
539.226	240,58-241,51	LysoPI14:2	PI31:1	0.0368969	0.024442	0.0390236		0.0238871	0.0116199		0.0201472	0.0192084	0.043568	0.0259855	0.0332258	0.0492866	0.0248086	0.0448671	0.0343612	0.0448151	0.0268751
571.288	240,58-241,51	LysoPI16:0	PI31:1	0.018384	0.0203264	0.0239279		0.0243659	0.0092321		0.0107778	0.013354	0.0392389	0.019613	0.0193232	0.0288643	0.0254578	0.0497261	0.0361906	0.0285051	0.0291366
569.273	240,58-241,51	LysoPI16:1	PI31:1	0.0407122	0.0377759	0.0394829		0.0322615	0.0298271		0.0324252	0.0334242	0.0588844	0.0292783	0.0375332	0.103448	0.0559152	0.0887019	0.0788322	0.0888155	0.0705791
567.257	240,58-241,51	LysoPI16:2	PI31:1	0.0359252	0.0289763	0.0355329		0.0261104	0.020157		0.0221635	0.0236173	0.0370315	0.0234052	0.0231342	0.0851335	0.0379044	0.0848073	0.0595324	0.0675758	0.052996
599.32	240,58-241,51	LysoPI18:0	PI31:1	0.0121267	0.0132212	0.0135423		0.0109362	0.00502815		0.00653885	0.00594337	0.023492	0.00911329	0.0102791	0.0169232	0.0159984	0.0262201	0.0128397	0.0160777	0.0131584
597.304	240,58-241,51	LysoPI18:1	PI31:1	0.0453313	0.0575529	0.0691587		0.0553458	0.0291039		0.0242711	0.0271342	0.0712073	0.0576376	0.0754162	0.128919	0.0482143	0.0731157	0.0635415	0.0875262	0.0585911
595.288	240,58-241,51	LysoPI18:2	PI31:1	0.0249949	0.0287206	0.0445234		0.0260635	0.0136054		0.014197	0.0156242	0.039274	0.0240238	0.02064	0.0402986	0.0327435	0.0428129	0.0363163	0.0414426	0.0326271
627.351	240,58-241,51	LysoPI20:0	PI31:1	0.0159748	0.0107873	0.0154292		0.0150816	0.00812189		0.0109829	0.00996828	0.0201211	0.0101117	0.0116372	0.0470524	0.0198688	0.0300009	0.0300534	0.0242026	0.0253594
625.335	240,58-241,51	LysoPI20:1	PI31:1	0.0239475	0.0290795	0.0395683		0.0298302	0.0172322		0.0252831	0.0243431	0.0280184	0.0229816	0.0302802	0.0573196	0.0412891	0.0612425	0.0699499	0.0444687	0.0569813
623.32	240,58-241,51	LysoPI20:2	PI31:1	0.0138478	0.0152136	0.0104636		0.0238922	0.00826096		0.00908351	0.0108695	0.0316883	0.0122672	0.0134541	0.0319163	0.0193845	0.0416183	0.0243498	0.0219974	0.0269147
655.382	240,58-241,51	LysoPI22:0	PI31:1	0.00701371	0.00619585	0.00520508		0.00398552	0.00247852		0.00327673	0.00261806	0.00417155	0.00413185	0.0041702	0.00975217	0.00747337	0.0105814	0.00819888	0.00851978	0.00692402
653.367	240,58-241,51	LysoPI22:1	PI31:1	0.0385162	0.0602154	0.118941		0.0494376	0.0356473		0.0359011	0.0475325	0.156335	0.0328984	0.112747	0.0730792	0.107145	0.15178	0.153647	0.167303	0.108382
651.351	240,58-241,51	LysoPI22:2	PI31:1	0.0292591	0.0310629	0.0270152		0.0187893	0.0191902		0.0191685	0.0163077	0.0322854	0.0163768	0.0181481	0.0582996	0.0279764	0.0365265	0.0479483	0.0466752	0.0499441
692.559	183,65-184,57	PC(O-)30:0	DLPC	0.00942449	0.0046195	0.00820826		0.00979037	0.00640001		0.0104577	0.0145459	0.0147643	0.00480639	0.00651017	0.00743573	0.00633494	0.00639898	0.00647392	0.00807408	0.00962078
690.544	183,65-184,57	PC(O-)30:1	DLPC	0.0366644	0.0267197	0.0334256		0.0411419	0.0269416		0.0368368	0.0441721	0.045263	0.026265	0.0290306	0.0345475	0.0352009	0.0237132	0.0336298	0.0345561	0.0440344
688.528	183,65-184,57	PC(O-)30:2	DLPC	0.0018968	0.00185426	0.00214785		0.00190367	0.00140603		0.00170344	0.00159241	0.0018237	0.00165717	0.00154621	0.00178829	0.00114696	0.00097462	0.000955431	0.00144561	0.00148425
686.512	183,65-184,57	PC(O-)30:3	DLPC	0.00111194	0.00135139	0.00128699		0.00166967	0.001001		0.00102663	0.00102927	0.00194348	0.00175754	0.00195342	0.00126373	0.000794268	0.000910669	0.00132953	0.00113233	0.00100437
684.497	183,65-184,57	PC(O-)30:4	DLPC	0.00085217	0.000782885	0.00103524		0.000732423	0.000953853		0.00101704	0.000799829	0.00103658	0.000966879	0.00095753	0.00113378	0.000414555	0.000727768	0.00100876	0.00102321	0.000773098
682.481	183,65-184,57	PC(O-)30:5	DLPC	0.000285355	0.000344067	0.000248679		0.000934711	0.000366534		0.00045623	0.000377172	0.00208037	0.000477313	0.000547371	0.000393425	0.000334204	0.000497542	0.000312382	0.000324925	0.000123068
680.465	183,65-184,57	PC(O-)30:6	DLPC	0.00100458	0.00156206	0.000865159		0.00220551	0.00154824		0.00145455	0.00105785	0.00219925	0.00088227	0.00129392	0.00105629	0.0022029	0.00130077	0.00120534	0.0012574	0.000737582
720.591	183,65-184,57	PC(O-)32:0	DLPC	0.102614	0.0909819	0.110243		0.105262	0.0983772		0.107174	0.138074	0.162881	0.103346	0.121018	0.160565	0.0805801	0.109	0.134438	0.122345	0.17444
718.575	183,65-184,57	PC(O-)32:1	DLPC	0.127799	0.11543	0.131072		0.120658	0.0912336		0.0954175	0.163466	0.155873	0.104421	0.128071	0.156422	0.117182	0.167967	0.178032	0.116495	0.205256
716.559	183,65-184,57	PC(O-)32:2	DLPC	0.0148601	0.0122996	0.0132697		0.00992608	0.0103345		0.0109148	0.0155771	0.0152525	0.0117455	0.0117921	0.0118659	0.012832	0.0118515	0.0149418	0.0110726	0.0244649
714.544	183,65-184,57	PC(O-)32:3	DLPC	0.00204365	0.00151019	0.00145708		0.00182059	0.00128582		0.00100745	0.00131426	0.00230732	0.00167935	0.00150416	0.00129711	0.00194976	0.00154251	0.00109486	0.001079	0.00112165
712.528	183,65-184,57	PC(O-)32:4	DLPC	0.000565703	0.00055633	0.000641654		0.00083325	0.000424284		0.000431113	0.00042467	0.00111674	0.000751563	0.000654336	0.000400578	0.00049064	0.000497542	0.000659049	0.000582413	0.000502183
710.512	183,65-184,57	PC(O-)32:5	DLPC	0.000403835	0.000431407	0.000461131		0.00187513	0.00050089		0.000541631	0.000514435	0.00144635	0.000658201	0.00067868	0.000358851	0.000305761	0.000603702	0.000289525	0.000415659	0.000560001
708.497	183,65-184,57	PC(O-)32:6	DLPC	0.00488941	0.00283564	0.00430246		0.00714287	0.00738882		0.00940364	0.00998277	0.0111836	0.00437984	0.00651164	0.00694454	0.0040268	0.00491659	0.00455849	0.007057	0.00628886
748.622	183,65-184,57	PC(O-)34:0	DLPC	0.0776954	0.0582844	0.0591538		0.0555475	0.080753		0.0617341	0.101119	0.107861	0.0547708	0.0550218	0.0758439	0.0612631	0.0637379	0.0628489	0.0649813	0.106673
746.606	183,65-184,57	PC(O-)34:1	DLPC	0.488026	0.332417	0.391721		0.335296	0.476264		0.474545	0.575247	0.720238	0.515536	0.405673	0.531427	0.444469	0.520955	0.53675	0.47538	0.747534
744.591	183,65-184,57	PC(O-)34:2	DLPC	0.401124	0.306368	0.292682		0.418134	0.250214		0.309997	0.381994	0.316874	0.362074	0.32746	0.294714	0.374968	0.242019	0.311695	0.239361	0.404688
742.575	183,65-184,57	PC(O-)34:3	DLPC	0.221762	0.159954	0.138024		0.148785	0.090462		0.0826622	0.161428	0.096378	0.205004	0.124719	0.141845	0.225135	0.134972	0.205253	0.0793638	0.199122
740.559	183,65-184,57	PC(O-)34:4	DLPC	0.00642799	0.00438289	0.0040851		0.00316559	0.00353177		0.00293741	0.00376085	0.00314577	0.0044166	0.00320972	0.00221391	0.00453806	0.00258875	0.00363887	0.00191828	0.00394891
738.544	183,65-184,57	PC(O-)34:5	DLPC	0.00246751	0.0017521	0.00135883		0.002222	0.00158831		0.00114126	0.00134888	0.00260542	0.00175637	0.00153367	0.00142467	0.00186159	0.00137624	0.0012861	0.000835609	0.00132897
776.653	183,65-184,57	PC(O-)36:0	DLPC	0.0511847	0.0355977	0.0396905		0.0404659	0.0341501		0.0358678	0.0398957	0.0651571	0.0356514	0.0341642	0.0309959	0.0280682	0.0271269	0.0295346	0.0323313	0.035451
774.638	183,65-184,57	PC(O-)36:1	DLPC	0.414829	0.269148	0.32236		0.25451	0.293251		0.258352	0.335557	0.352373	0.281002	0.26861	0.21912	0.225841	0.244981	0.187469	0.260844	0.382504
772.622	183,65-184,57	PC(O-)36:2	DLPC	0.464823	0.363505	0.476374		0.501435	0.277533		0.338873	0.414721	0.461359	0.428439	0.347307	0.340284	0.462516	0.374469	0.331504	0.369196	0.524569
770.606	183,65-184,57	PC(O-)36:3	DLPC	0.297406	0.268772	0.251048		0.265859	0.220684		0.314662	0.297976	0.337802	0.319664	0.274961	0.294765	0.321048	0.208374	0.250651	0.240937	0.307687
768.591	183,65-184,57	PC(O-)36:4	DLPC	0.666445	0.574516	0.536987		0.656606	0.604288		0.821107	0.788309	0.637429	0.492729	0.859296	0.634194	0.618661	0.552753	0.757675	0.586241	0.744837
766.575	183,65-184,57	PC(O-)36:5	DLPC	0.495571	0.354143	0.243091		0.228903	0.345771		0.26641	0.440207	0.259017	0.392792	0.28733	0.348566	0.554194	0.320004	0.655089	0.281993	0.622374
764.559	183,65-184,57	PC(O-)36:6	DLPC	0.0483367	0.0420296	0.0249594		0.0222821	0.0316575		0.0235628	0.0237807	0.0288811	0.0432166	0.0215201	0.0232276	0.0299219	0.0243681	0.0263833	0.0214959	0.0415193
802.669	183,65-184,57	PC(O-)38:1	DLPC	0.101116	0.147193	0.140384		0.100117	0.0861422		0.0831449	0.0888615	0.0969796	0.099756	0.101163	0.100807	0.050981	0.0602001	0.0538615	0.0661406	0.0824374
800.653	183,65-184,57	PC(O-)38:2	DLPC	0.181098	0.254998	0.216249		0.134095	0.121468		0.129289	0.143201	0.158764	0.189829	0.180758	0.167829	0.0931626	0.103667	0.100905	0.130918	0.136813
798.638	183,65-184,57	PC(O-)38:3	DLPC	0.246001	0.246485	0.288737		0.147656	0.166151		0.164727	0.1874	0.250887	0.21573	0.241835	0.236303	0.113843	0.140095	0.155277	0.184299	0.155237
796.622	183,65-184,57	PC(O-)38:4	DLPC	0.545345	0.520907	0.561462		0.403573	0.506453		0.504995	0.703919	0.591941	0.361532	0.448728	0.540811	0.463309	0.510427	0.662993	0.59083	0.704679
794.606	183,65-184,57	PC(O-)38:5	DLPC	0.721223	0.714412	0.664694		0.57574	0.720759		0.75319	1.05235	1.0146	0.734051	0.825337	0.886466	0.783972	0.99137	1.01812	0.909468	1.43301
792.591	183,65-184,57	PC(O-)38:6	DLPC	0.2582	0.261575	0.174094		0.170567	0.166248		0.184652	0.271234	0.180232	0.199477	0.171843	0.187592	0.238669	0.188572	0.270706	0.180915	0.360479
828.685	183,65-184,57	PC(O-)40:2	DLPC	0.0662178	0.0639721	0.059941		0.0383308	0.0461951		0.0404949	0.0506795	0.055754	0.0524023	0.0828853	0.0605707	0.0523797	0.0513824	0.0438348	0.0325317	0.0573158
826.669	183,65-184,57	PC(O-)40:3	DLPC	0.10019	0.116072	0.132628		0.0622331	0.058273		0.0528574	0.0733383	0.0768306	0.0741165	0.137082	0.078896	0.0987679	0.0662358	0.0758913	0.0243583	0.0445192
824.653	183,65-184,57	PC(O-)40:4	DLPC	0.101123	0.153505	0.150643		0.088218	0.0899057		0.0893495	0.109561	0.108741	0.0980078	0.166331	0.127482	0.135779	0.093648	0.128109	0.0561102	0.0923497
822.638	183,65-184,57	PC(O-)40:5	DLPC	0.196136	0.199774	0.179916		0.114188	0.0957683		0.0976269	0.157879	0.150923	0.203156	0.186362	0.143755	0.105052	0.118063	0.110694	0.111017	0.184137
820.622	183,65-184,57	PC(O-)40:6	DLPC	0.150086	0.167215	0.119887		0.126296	0.131393		0.111377	0.168363	0.142726	0.145656	0.0891742	0.097741	0.128521	0.132074	0.123486	0.0936881	0.218809
858.732	183,65-184,57	PC(O-)42:1	DLPC	0.0101404	0.009591	0.0120342		0.00842128	0.00707572		0.00848936	0.00977064	0.0140547	0.00995005	0.0105468	0.0100633	0.00579382	0.00783661	0.00940574	0.00807837	0.00732296
856.716	183,65-184,57	PC(O-)42:2	DLPC	0.0177092	0.0160552	0.0188284		0.0116642	0.0116953		0.0153392	0.0171104	0.0246619	0.013181	0.0143607	0.015402	0.0105281	0.00912715	0.0145905	0.013477	0.0178275
854.7	183,65-184,57	PC(O-)42:3	DLPC	0.0256012	0.0294156	0.0337215		0.0247762	0.0215544		0.0264582	0.026908	0.0270133	0.020993	0.0384251	0.0179783	0.0183286	0.0188925	0.0237646	0.0115379	0.022106
852.685	183,65-184,57	PC(O-)42:4	DLPC	0.0324759	0.0523675	0.0585594		0.0395648	0.0333766		0.0431391	0.0428953	0.0443353	0.0293658	0.0666958	0.0343841	0.0291284	0.0371174	0.053194	0.0229323	0.0405265
850.669	183,65-184,57	PC(O-)42:5	DLPC	0.0606898	0.0879033	0.0790297		0.0537878	0.0476612		0.0720593	0.0767655	0.0726707	0.0629644	0.126413	0.066124	0.050169	0.0595247	0.100418	0.0447244	0.0976846
848.653	183,65-184,57	PC(O-)42:6	DLPC	0.0361916	0.0552069	0.0460806		0.0321962	0.0300523		0.0446827	0.0472668	0.0329653	0.0453237	0.0557366	0.0345177	0.0321355	0.0346898	0.0415483	0.0263643	0.0511063
886.763	183,65-184,57	PC(O-)44:1	DLPC	0.0014607	0.00221103	0.0022111		0.00168235	0.00157574		0.00205646	0.00221795	0.00247663	0.00107716	0.00223448	0.00152601	0.00251577	0.00182645	0.001712	0.00073384	0.00148095
884.747	183,65-184,57	PC(O-)44:2	DLPC	0.00172937	0.00323582	0.00238548		0.00180284	0.00202988		0.00214278	0.00197482	0.00214702	0.00115185	0.00270808	0.00158681	0.000971325	0.00160007	0.00135391	0.000723418	0.00145286
882.732	183,65-184,57	PC(O-)44:3	DLPC	0.00350046	0.00674477	0.00588296		0.00343573	0.0031562		0.00454952	0.00459328	0.00491454	0.00311537	0.00602993	0.00297572	0.0022029	0.00334594	0.00290287	0.00169022	0.00338148
880.716	183,65-184,57	PC(O-)44:4	DLPC	0.0176419	0.0187215	0.0262262		0.0143117	0.0109363		0.0178126	0.0199011	0.0239459	0.0169353	0.0273066	0.0174955	0.0122063	0.0141064	0.0162111	0.0106177	0.0229501
878.7	183,65-184,57	PC(O-)44:5	DLPC	0.0629666	0.07015	0.095189		0.0448173	0.0355644		0.0598183	0.0735947	0.0807626	0.0547708	0.0944568	0.0661085	0.0493022	0.0514681	0.0671476	0.0477793	0.107393
876.685	183,65-184,57	PC(O-)44:6	DLPC	0.0312844	0.0403273	0.0468887		0.0280616	0.0191175		0.0331738	0.0410831	0.0345054	0.030485	0.0495798	0.0352914	0.0360691	0.0322418	0.0484001	0.0195801	0.0457648
678.507	183,65-184,57	PC28:0	DLPC	0.00807169	0.00456445	0.00556244		0.0140276	0.0101769		0.0230851	0.0143233	0.0177453	0.0066567	0.00752893	0.00761694	0.00665137	0.00704361	0.00647545	0.0096049	0.00646148
676.492	183,65-184,57	PC28:1	DLPC	0.0531738	0.0402426	0.0423891		0.0400391	0.0327374		0.0504064	0.0617358	0.0625093	0.0406294	0.032469	0.0408733	0.0246237	0.0280593	0.0364123	0.0490851	0.0512087
674.476	183,65-184,57	PC28:2	DLPC	0.00438823	0.00521076	0.00594129		0.00546369	0.00424755		0.00607988	0.00571956	0.0050073	0.00422346	0.00460839	0.00331907	0.00306685	0.00310804	0.0024762	0.00436012	0.00361027
672.46	183,65-184,57	PC28:3	DLPC	0.000422747	0.000691839	0.000521306		0.000396967	0.000395605		0.000335208	0.000286602	0.000441291	0.000469144	0.000493519	0.000454227	0.000226121	0.000285223	0.000229334	0.000392362	0.000309735
666.413	183,65-184,57	PC28:6	DLPC	0.000576271	0.000769122	0.0010377		0.00126383	0.00106228		0.00115176	0.000907707	0.00205516	0.00121604	0.00149162	0.000714126	0.000812756	0.00116903	0.000993527	0.00118628	0.000949854
706.539	183,65-184,57	PC30:0	DLPC	0.112876	0.0636185	0.112208		0.136392	0.154453		0.19017	0.241142	0.236093	0.104845	0.131277	0.155776	0.0892851	0.121549	0.124686	0.165219	0.144106
704.523	183,65-184,57	PC30:1	DLPC	0.664566	0.89753	0.866742		0.96409	0.587603		0.649113	0.772596	1.18557	1.02352	0.879212	1.04361	0.702384	0.769701	1.08908	0.893182	1.21495
702.507	183,65-184,57	PC30:2	DLPC	0.0968414	0.125306	0.109846		0.10144	0.0656284		0.106483	0.0998929	0.105066	0.102432	0.100481	0.0925097	0.0871448	0.0705142	0.105558	0.0804238	0.109565
700.492	183,65-184,57	PC30:3	DLPC	0.000859401	0.00136674	0.00119243		0.00201464	0.00108192		0.00129425	0.00136418	0.00161747	0.00141385	0.00134261	0.00116954	0.000946437	0.00104369	0.00100191	0.00110352	0.00108944
698.476	183,65-184,57	PC30:4	DLPC	0.000364898	0.000498103	0.000499815		0.0023038	0.000574747		0.000556245	0.000851756	0.00283507	0.00137184	0.0015167	0.000278974	0.000997634	0.00133275	0.000536382	0.000291206	0.000312213
694.445	183,65-184,57	PC30:6	DLPC	0.000960082	0.000698721	0.000913667		0.00137226	0.00108624		0.00118373	0.00137022	0.00210469	0.000800578	0.00181104	0.000779696	0.00116474	0.0010795	0.000971431	0.00107654	0.000874691
734.57	183,65-184,57	PC32:0	DLPC	0.49585	0.454345	0.542067		0.514807	0.610042		0.565937	0.838451	0.944209	0.637681	0.658366	0.963041	0.419191	0.71627	0.745265	0.634342	0.956232
732.554	183,65-184,57	PC32:1	DLPC	0.962623	0.536173	0.754718		0.564365	1.74292		1.14603	1.2192	1.25962	0.850874	1.01376	0.780481	0.520742	1.20733	0.856509	1.24732	1.09198
730.539	183,65-184,57	PC32:2	DLPC	0.172643	0.148097	0.200386		0.242371	0.173099		0.210087	0.169412	0.180925	0.172785	0.160894	0.130675	0.152347	0.149785	0.153344	0.158471	0.172191
728.523	183,65-184,57	PC32:3	DLPC	0.00922535	0.0103257	0.00794669		0.00795836	0.00703957		0.00820438	0.00814441	0.00854123	0.0100329	0.00691074	0.00513479	0.00621762	0.00595388	0.00667811	0.00632807	0.00628473
726.507	183,65-184,57	PC32:4	DLPC	0.0009751	0.00133869	0.00100331		0.00174704	0.000740139		0.000923878	0.0012877	0.00205966	0.00123413	0.00136769	0.000668822	0.00102252	0.000753348	0.00105219	0.000651076	0.000633511
724.492	183,65-184,57	PC32:5	DLPC	0.000518422	0.000502338	0.0007356		0.00156377	0.000493033		0.000730699	0.000760381	0.00353753	0.000837923	0.000911055	0.00043992	0.000814889	0.000663816	0.000436573	0.000360483	0.000464189
722.476	183,65-184,57	PC32:6	DLPC	0.00735414	0.00697027	0.00788099		0.00934077	0.00701207		0.00669047	0.0105616	0.0144212	0.00823335	0.00922268	0.0100609	0.00667412	0.00715873	0.00976384	0.0078031	0.0107928
762.601	183,65-184,57	PC34:0	DLPC	1.25965	1.00779	0.893452		0.831603	1.24146		1.0338	1.05159	1.29949	1.12502	0.924153	0.921646	1.00974	1.10298	1.0604	1.26404	1.19382
760.586	183,65-184,57	PC34:1	DLPC	20.3559	16.2229	13.5476		12.3095	18.1016		15.5724	15.4194	19.0443	17.0126	13.3417	13.248	18.5819	15.7201	17.9328	14.6558	17.0775
758.57	183,65-184,57	PC34:2	DLPC	16.3942	21.0344	21.9376		28.4009	13.731		15.9663	16.4882	15.2903	20.357	20.3291	16.1847	25.5238	17.9371	17.3168	12.0328	14.7152
756.554	183,65-184,57	PC34:3	DLPC	0.589477	0.470731	0.586956		0.408771	0.349351		0.538367	0.452211	0.489743	0.468822	0.455913	0.250057	0.306415	0.340229	0.417991	0.45176	0.263661
754.539	183,65-184,57	PC34:4	DLPC	0.0477065	0.0229249	0.037787		0.0357733	0.0440921		0.0684574	0.0476589	0.0347719	0.0226105	0.0324409	0.0217516	0.0180221	0.0177823	0.0291087	0.0354757	0.0189475
752.523	183,65-184,57	PC34:5	DLPC	0.0075338	0.00492334	0.0040151		0.00274833	0.0041238		0.00476142	0.00380674	0.00461554	0.00536714	0.0025421	0.00165715	0.00288055	0.00204005	0.00277563	0.00302609	0.00345334
750.507	183,65-184,57	PC34:6	DLPC	0.00772571	0.00940574	0.00763968		0.00697673	0.00557815		0.00393253	0.00657051	0.016978	0.00480931	0.00415175	0.00502749	0.00467743	0.00420673	0.00447773	0.00417743	0.00581558
790.633	183,65-184,57	PC36:0	DLPC	0.309372	0.166138	0.197192		0.171065	0.273743		0.207564	0.251576	0.259843	0.17234	0.184092	0.174951	0.210009	0.200938	0.211713	0.192731	0.324021
788.617	183,65-184,57	PC36:1	DLPC	3.84505	2.01476	2.72766		2.55383	3.66347		3.11178	2.9656	3.68666	2.1614	3.28658	2.49328	2.34779	2.64214	2.23767	2.96234	4.14162
786.601	183,65-184,57	PC36:2	DLPC	8.91893	9.08962	10.7901		11.8061	7.70413		8.9914	10.8852	10.641	9.45065	12.7465	10.9581	9.2301	9.54332	7.69346	9.04335	12.0668
784.586	183,65-184,57	PC36:3	DLPC	7.92274	7.16896	6.80303		6.21035	7.48621		8.04239	7.1667	8.87923	6.45565	6.86908	8.67329	7.13584	4.53215	5.95015	9.20348	4.89865
782.57	183,65-184,57	PC36:4	DLPC	7.35634	8.14434	8.01503		7.85922	10.486		13.0666	9.85026	5.5079	6.16868	8.48915	9.22457	6.77039	10.646	12.883	10.2862	8.03464
780.554	183,65-184,57	PC36:5	DLPC	0.740362	1.07361	0.552828		0.268912	0.511105		0.614479	0.548663	0.491162	0.914387	0.285208	0.295345	0.524176	0.599349	0.609234	0.689925	0.755992
778.539	183,65-184,57	PC36:6	DLPC	0.0298232	0.0364923	0.0189635		0.0205675	0.0203126		0.0222192	0.0187241	0.0171113	0.023606	0.0114476	0.00936351	0.0137699	0.0112452	0.0106705	0.0146811	0.0130072
818.664	183,65-184,57	PC38:0	DLPC	0.0936753	0.105382	0.0690297		0.0833478	0.0708507		0.0615482	0.113032	0.0987348	0.101642	0.0600418	0.0626535	0.111157	0.0700793	0.0878776	0.071733	0.16797
816.648	183,65-184,57	PC38:1	DLPC	0.172663	0.212391	0.197997		0.180944	0.176228		0.117723	0.172643	0.180239	0.211698	0.122283	0.182356	0.126287	0.112424	0.112554	0.134824	0.167985
814.633	183,65-184,57	PC38:2	DLPC	0.755991	1.00317	0.917024		0.737116	0.980358		0.733397	0.843993	1.21727	1.14595	0.811346	1.35977	0.695625	0.841211	0.860297	1.11562	1.08601
812.617	183,65-184,57	PC38:3	DLPC	2.55811	2.03868	2.5805		1.64565	3.46609		2.71697	2.67034	3.1208	2.15852	2.13001	2.94188	1.84008	1.81615	1.97158	3.44429	1.85909
810.601	183,65-184,57	PC38:4	DLPC	3.95926	4.05108	4.33607		3.37657	6.02998		5.82029	5.38416	3.44793	3.59316	4.22905	4.43227	2.81671	5.35925	5.89786	5.84548	4.45368
808.586	183,65-184,57	PC38:5	DLPC	2.0791	2.2625	2.09964		1.47862	2.56176		2.82061	2.85735	1.67675	2.26819	2.12609	1.96914	1.48437	2.22098	1.63288	2.60249	2.48571
806.57	183,65-184,57	PC38:6	DLPC	3.19753	3.90475	3.04311		2.82764	3.05958		2.56305	2.55966	1.74177	3.02282	1.88064	1.71523	2.07208	2.79474	2.41811	2.44683	2.52598
846.695	183,65-184,57	PC40:0	DLPC	0.0152306	0.0258839	0.0150123		0.0143542	0.0093916		0.0122835	0.0157124	0.0144951	0.016193	0.016129	0.010942	0.0133703	0.0119935	0.0108755	0.0104583	0.018727
844.679	183,65-184,57	PC40:1	DLPC	0.00843047	0.00998324	0.0082973		0.00673132	0.00683332		0.00717592	0.00801882	0.00930043	0.0083909	0.00777827	0.00724617	0.00645014	0.00543204	0.00582325	0.00570703	0.00829759
842.664	183,65-184,57	PC40:2	DLPC	0.0121607	0.0121482	0.013215		0.00953926	0.0112349		0.00850899	0.0103197	0.014813	0.0147203	0.0124626	0.0134754	0.00760065	0.00952621	0.00936155	0.00893421	0.0116807
840.648	183,65-184,57	PC40:3	DLPC	0.0238463	0.029837	0.0296555		0.0179891	0.0352128		0.0242113	0.0325954	0.0297151	0.0278335	0.030022	0.0300195	0.0147469	0.0210464	0.020554	0.0234749	0.0247491
838.633	183,65-184,57	PC40:4	DLPC	0.12775	0.121404	0.129633		0.0933246	0.28348		0.132496	0.192147	0.134678	0.109872	0.168117	0.15345	0.0823912	0.141615	0.0951378	0.123176	0.116924
836.617	183,65-184,57	PC40:5	DLPC	0.354122	0.310361	0.31552		0.252494	0.666863		0.353463	0.574798	0.309912	0.291032	0.329673	0.375839	0.197816	0.380775	0.243744	0.350397	0.413649
834.601	183,65-184,57	PC40:6	DLPC	0.943341	0.949439	0.678186		0.771042	1.27715		0.786224	1.11238	0.644366	0.745623	0.629067	0.716292	0.593981	0.905559	0.561986	0.912894	0.871344
874.726	183,65-184,57	PC42:0	DLPC	0.0133571	0.0180461	0.0176464		0.0127689	0.0101231		0.0154675	0.0178539	0.0142258	0.0152238	0.0167759	0.00821423	0.0136057	0.0115522	0.0182964	0.00764616	0.0215732
872.711	183,65-184,57	PC42:1	DLPC	0.00733634	0.0113939	0.0100798		0.00681566	0.00657443		0.00892412	0.00866367	0.00675896	0.00678158	0.00850637	0.00456134	0.00699411	0.00614062	0.00992384	0.00366246	0.00776485
870.695	183,65-184,57	PC42:2	DLPC	0.00520925	0.00806493	0.00616725		0.00419225	0.00345084		0.00317854	0.0036743	0.00540176	0.00672147	0.00443946	0.00295188	0.00279665	0.00293281	0.00360001	0.00177237	0.00322702
868.679	183,65-184,57	PC42:3	DLPC	0.00334527	0.00432201	0.0048207		0.00237292	0.00308234		0.00234646	0.00325809	0.0037942	0.00411259	0.00537264	0.00328569	0.00226974	0.00307095	0.00325791	0.00165099	0.00277275
866.664	183,65-184,57	PC42:4	DLPC	0.005459	0.00779285	0.00816528		0.00472936	0.0089296		0.00583463	0.00549455	0.00725338	0.00753197	0.0096048	0.00750726	0.00456082	0.00523379	0.00760993	0.0033596	0.0058734
864.648	183,65-184,57	PC42:5	DLPC	0.00793708	0.00977098	0.0086215		0.00636986	0.0121145		0.007871	0.010816	0.0106702	0.0100656	0.0103905	0.00886159	0.00905337	0.00991375	0.0114408	0.00631764	0.0106367
862.633	183,65-184,57	PC42:6	DLPC	0.00866966	0.00957883	0.0102014		0.00695199	0.020608		0.0107586	0.0150853	0.0115978	0.0106403	0.00958341	0.00891524	0.00714841	0.0107298	0.0108061	0.00803484	0.00863789
902.758	183,65-184,57	PC44:0	DLPC	0.0113241	0.0170922	0.0123965		0.0102831	0.00761		0.00797695	0.0151766	0.0104163	0.00986369	0.012709	0.00738208	0.0140152	0.00849403	0.00858974	0.00752722	0.0148846
900.742	183,65-184,57	PC44:1	DLPC	0.00355887	0.00660079	0.00613532		0.00497731	0.00315149		0.00464131	0.00712923	0.00416255	0.00413827	0.00604468	0.00302222	0.00860682	0.00513658	0.00564421	0.00304449	0.004499
898.726	183,65-184,57	PC44:2	DLPC	0.00137671	0.00244711	0.00254206		0.0017445	0.00139031		0.00170892	0.00208873	0.00164539	0.00127847	0.00241595	0.00136506	0.0020806	0.00170495	0.00168534	0.000906111	0.00110596
896.711	183,65-184,57	PC44:3	DLPC	0.00194186	0.00252281	0.00259179		0.00197786	0.00163703		0.0012358	0.00143341	0.00158414	0.00145411	0.00240341	0.00101694	0.00110074	0.0012445	0.000900574	0.000801277	0.000904426
894.695	183,65-184,57	PC44:4	DLPC	0.0042119	0.00491063	0.00496868		0.00335202	0.00261877		0.00163494	0.00252467	0.0027297	0.00312821	0.00530772	0.00266337	0.00338755	0.00226516	0.00198858	0.00118076	0.00169817
892.679	183,65-184,57	PC44:5	DLPC	0.00248308	0.00491328	0.00636619		0.00585621	0.00293227		0.00275108	0.00381157	0.00332409	0.00263747	0.00791548	0.00283623	0.00598865	0.00358384	0.00367772	0.00156884	0.00309239
890.664	183,65-184,57	PC44:6	DLPC	0.00151522	0.00502656	0.00577735		0.00660576	0.00284309		0.00269582	0.00262531	0.00260992	0.00148679	0.00694615	0.00179783	0.00589195	0.00382558	0.00327468	0.00079392	0.00192283
650.512	509,06-509,99	PE(O-)30:0	PE31:1	0.00386814	0.00436118	0.00372835		0.00334822	0.00189238		0.0022606	0.00275895	0.004847	0.00332485	0.0028298	0.00599317	0.00333777	0.003525	0.00418592	0.00356804	0.00306018
648.497	507,05-507,98	PE(O-)30:1	PE31:1	0.00513916	0.00460415	0.00606839		0.00356953	0.00268202		0.00380329	0.00311036	0.00421388	0.00423338	0.00482527	0.0078673	0.00364069	0.00580296	0.00570897	0.00493702	0.00434455
674.512	533,06-533,99	PE(O-)32:2	PE31:1	0.00169266	0.00200035	0.00228355		0.00154284	0.00119507		0.00127827	0.00113473	0.00220285	0.0016811	0.0016399	0.00244162	0.0020038	0.00182773	0.00176534	0.00160746	0.0015718
706.575	565,13-566,06	PE(O-)34:0	PE31:1	0.00131219	0.00133763	0.0017469		0.00141031	0.00100414		0.00149839	0.00135613	0.00174175	0.00177446	0.00140162	0.00192182	0.00158142	0.00128159	0.00175239	0.00162217	0.0012695
704.559	563,11-564,04	PE(O-)34:1	PE31:1	0.00440102	0.00413198	0.00543595		0.00633308	0.00377495		0.00724899	0.00548972	0.00657434	0.00513199	0.00480019	0.00682532	0.00416262	0.00607795	0.0035322	0.00735556	0.00454195
702.544	561,10-562,03	PE(O-)34:2	PE31:1	0.00339255	0.00356771	0.00541691		0.0061885	0.00322259		0.00432939	0.00339334	0.00503162	0.00395621	0.00439593	0.0037435	0.00379855	0.00433719	0.00284115	0.00381695	0.0033823
700.528	559,08-560,01	PE(O-)34:3	PE31:1	0.004564	0.00257203	0.00296942		0.00276038	0.00195721		0.00222681	0.00203962	0.00314758	0.00303601	0.00224702	0.00432529	0.00306899	0.00382686	0.00290058	0.0028575	0.0033121
698.512	557,06-557,99	PE(O-)34:4	PE31:1	0.0120266	0.0108672	0.0128871		0.00941053	0.00847585		0.00931002	0.00657212	0.0137872	0.0095305	0.0105291	0.0247273	0.0150036	0.0333954	0.0141958	0.00993841	0.018542
696.497	555,05-555,98	PE(O-)34:5	PE31:1	0.000604084	0.00100468	0.000583322		0.000663937	0.000287963		0.000467191	0.000288212	0.0010564	0.000885771	0.000812941	0.00204819	0.000793557	0.000840322	0.00103848	0.000714222	0.000835045
728.559	587,11-588,04	PE(O-)36:3	PE31:1	0.00766508	0.0074779	0.00888615		0.0128494	0.00576515		0.00898989	0.0071731	0.00956251	0.00792701	0.00740131	0.00545787	0.00995786	0.00806939	0.00489982	0.00622568	0.00510443
726.544	585,10-586,03	PE(O-)36:4	PE31:1	0.0107556	0.0165824	0.0192791		0.0293198	0.0147054		0.0252553	0.0183671	0.00926801	0.0121668	0.018362	0.011153	0.0175294	0.013912	0.00602897	0.0128842	0.00804402
724.528	583,08-584,01	PE(O-)36:5	PE31:1	0.0146248	0.0083423	0.0115664		0.00912073	0.00747957		0.00590542	0.00672307	0.0105703	0.0136717	0.00853588	0.0121532	0.0114454	0.00898006	0.00655011	0.00586643	0.00735352
722.512	581,06-581,99	PE(O-)36:6	PE31:1	0.00285021	0.00218933	0.00138892		0.000951833	0.00105285		0.000782305	0.00106711	0.001667	0.00268532	0.00191875	0.00187175	0.00135601	0.00157448	0.00113524	0.00138982	0.00194101
754.575	613,13-614,06	PE(O-)38:4	PE31:1	0.0161534	0.0116988	0.0220883		0.0250749	0.0178612		0.0287854	0.0276334	0.0231498	0.0154473	0.0178191	0.0258242	0.0212163	0.0269965	0.0124488	0.0318874	0.0136192
752.559	611,11-612,04	PE(O-)38:5	PE31:1	0.0374387	0.0261925	0.0334778		0.0329768	0.0235623		0.0380735	0.0340111	0.0248312	0.0294814	0.0368878	0.0365098	0.0340981	0.0362541	0.020058	0.0239727	0.0213775
750.544	609,10-610,03	PE(O-)38:6	PE31:1	0.0291957	0.0274566	0.0222583		0.029912	0.0198223		0.0272231	0.0220486	0.0217611	0.0262073	0.0227085	0.013957	0.0271694	0.0221605	0.014064	0.0192116	0.0180547
778.575	637,13-638,06	PE(O-)40:6	PE31:1	0.0120416	0.0142137	0.0125844		0.0206188	0.0145946		0.0169883	0.0165871	0.0150525	0.0180404	0.0103521	0.0131535	0.0153286	0.0252595	0.0131117	0.0176931	0.0134954
636.46	495,01-495,94	PE28:0	PE31:1	0.00103796	0.00220732	0.00170084		0.00230063	0.000736997		0.000948082	0.00108643	0.00149859	0.00144478	0.00123933	0.00271344	0.00151316	0.0013174	0.00133715	0.00144254	0.00164449
634.445	493,00-493,93	PE28:1	PE31:1	0.000741477	0.00105337	0.00108252		0.00143441	0.000782961		0.00124493	0.000814723	0.00189935	0.00139576	0.00115671	0.00196474	0.000978436	0.00149519	0.00189791	0.0012715	0.00136283
632.429	490,98-491,91	PE28:2	PE31:1	0.00108246	0.00138844	0.00158479		0.00205903	0.000713818		0.00118282	0.00136096	0.00266846	0.00186024	0.00168416	0.00329881	0.000846887	0.00135193	0.00148267	0.00158968	0.00153216
630.413	488,97-489,89	PE28:3	PE31:1	0.00128938	0.00173357	0.00182979		0.00175782	0.000946781		0.00089876	0.000752733	0.00133648	0.0016881	0.00141785	0.00271105	0.000972747	0.00108206	0.00139124	0.00106367	0.00140413
628.398	486,95-487,88	PE28:4	PE31:1	0.0143267	0.0118624	0.0110328		0.00559559	0.00727254		0.00547705	0.00587897	0.00438769	0.0103958	0.0106	0.0217218	0.00931149	0.00723419	0.00675964	0.00646294	0.0086288
626.382	484,93-485,86	PE28:5	PE31:1	0.023863	0.0172161	0.0171257		0.0081727	0.00794196		0.00830805	0.00820398	0.00957962	0.0238481	0.0162153	0.0226267	0.0171169	0.015475	0.0124031	0.0123349	0.0180125
624.367	482,92-483,85	PE28:6	PE31:1	0.0152812	0.0149399	0.0176704		0.0184279	0.00645186		0.00746546	0.00799749	0.00967778	0.012343	0.0151397	0.0107572	0.021788	0.00962725	0.0107612	0.00961471	0.0140991
664.492	523,04-523,97	PE30:0	PE31:1	0.00126379	0.00154671	0.00182242		0.00186689	0.000618747		0.000816557	0.00123094	0.0018255	0.00185673	0.00123564	0.00255488	0.00148045	0.00147088	0.00151086	0.00186065	0.00103575
662.476	521,03-521,96	PE30:1	PE31:1	0.00278179	0.00304685	0.00338265		0.00413137	0.00191517		0.00233778	0.00244095	0.00598625	0.00406591	0.0032407	0.00595383	0.00402538	0.0051596	0.00364268	0.00445944	0.00461216
660.46	519,01-519,94	PE30:2	PE31:1	0.00148518	0.00156524	0.00167506		0.0011611	0.000672568		0.00112939	0.000964062	0.00197951	0.0021129	0.0016635	0.0028422	0.000738804	0.00128415	0.00171429	0.00104037	0.00151233
658.445	517,00-517,93	PE30:3	PE31:1	0.00265663	0.00397794	0.00332309		0.00237102	0.00137067		0.00156644	0.00161294	0.0013572	0.00360319	0.00244989	0.00394379	0.00139441	0.00158216	0.00190858	0.00207155	0.00145947
656.429	514,98-515,91	PE30:4	PE31:1	0.00130718	0.00201517	0.00185926		0.00154919	0.00070714		0.000963153	0.00122812	0.00184982	0.00199678	0.00124523	0.00228902	0.0010147	0.00143379	0.00196496	0.00157803	0.00177994
654.413	512,97-513,89	PE30:5	PE31:1	0.000683071	0.000895104	0.000992876		0.000961979	0.000275392		0.000344342	0.000435539	0.000973542	0.00143544	0.00103794	0.00144852	0.000650631	0.000617771	0.00101257	0.000689086	0.00129345
652.398	510,95-511,88	PE30:6	PE31:1	0.000943394	0.0011116	0.000973841		0.000869396	0.000648211		0.000505096	0.000595343	0.00116627	0.00108883	0.000806302	0.00209588	0.000649209	0.00106927	0.00128915	0.000673146	0.000710325
692.523	551,08-552,00	PE32:0	PE31:1	0.00226726	0.00216445	0.00320704		0.00513077	0.00324695		0.00310547	0.00328465	0.00778834	0.00570733	0.00461872	0.00688851	0.00539277	0.00607283	0.00499659	0.00464336	0.00446927
690.507	549,06-549,99	PE32:1	PE31:1	0.00443217	0.00438236	0.00455974		0.00639967	0.0132239		0.0102892	0.00712319	0.0177525	0.00740827	0.00804458	0.0106213	0.0088365	0.0130602	0.0077425	0.0202017	0.00645983
688.492	547,04-547,97	PE32:2	PE31:1	0.00106632	0.00136621	0.00180891		0.0020863	0.00151956		0.00180437	0.00124583	0.00315478	0.00228036	0.00183022	0.00279332	0.00163973	0.00234318	0.00167848	0.00236521	0.00234738
686.476	545,03-545,96	PE32:3	PE31:1	0.00138505	0.00126723	0.00152462		0.00181806	0.00101789		0.00119195	0.000888788	0.00144275	0.00223018	0.00147761	0.00255607	0.00130268	0.00114345	0.00175696	0.001201	0.00116873
684.46	543,01-543,94	PE32:4	PE31:1	0.00160978	0.001624	0.00173462		0.00101525	0.000904746		0.000902414	0.000956414	0.00164629	0.00224302	0.00137285	0.00280643	0.00121807	0.0013481	0.00144915	0.0014168	0.00182042
682.445	541,00-541,93	PE32:5	PE31:1	0.00104018	0.00182991	0.00159892		0.00168869	0.000661961		0.00112208	0.000922601	0.00188404	0.00147337	0.000940563	0.00217337	0.00111069	0.00110636	0.00147886	0.00111701	0.000873039
680.429	538,98-539,91	PE32:6	PE31:1	0.00106021	0.00165893	0.00140857		0.00152889	0.000532319		0.00109057	0.000797816	0.00153641	0.00157256	0.00168268	0.00241062	0.00133397	0.00214237	0.0012861	0.000815991	0.00128602
720.554	579,11-580,03	PE34:0	PE31:1	0.0060286	0.00522558	0.00664005		0.00825323	0.00872296		0.00825873	0.00559679	0.0176408	0.0101846	0.0109334	0.015737	0.00971396	0.014595	0.00845107	0.0214806	0.0087114
718.539	577,09-578,02	PE34:1	PE31:1	0.0473216	0.0458229	0.0617382		0.0796375	0.0877399		0.0828239	0.0584165	0.172963	0.0982903	0.0902616	0.133073	0.107513	0.154031	0.0969808	0.213018	0.0780986
716.523	575,08-576,00	PE34:2	PE31:1	0.039355	0.0732439	0.0703063		0.123422	0.0967269		0.0912315	0.0632268	0.166344	0.144139	0.12907	0.150202	0.177195	0.166362	0.148385	0.211153	0.0844238
714.507	573,06-573,99	PE34:3	PE31:1	0.00274174	0.00470313	0.00453211		0.00647005	0.00689579		0.00579079	0.00492175	0.0114817	0.0095976	0.00619665	0.00776835	0.00770873	0.00893786	0.00528916	0.0135347	0.00500945
712.492	571,04-571,97	PE34:4	PE31:1	0.00110804	0.000984032	0.00127287		0.00180411	0.00146535		0.00172765	0.00131789	0.00261983	0.00157373	0.00130056	0.00260137	0.00111496	0.00189041	0.00145372	0.00225608	0.00166513
710.476	569,03-569,96	PE34:5	PE31:1	0.00120706	0.00119259	0.00118506		0.00115095	0.000612069		0.000780935	0.0007793	0.00157874	0.00134033	0.000891137	0.00205773	0.000807778	0.00101683	0.00117638	0.000972936	0.00131575
708.46	567,01-567,94	PE34:6	PE31:1	0.000719783	0.00077071	0.00123357		0.000988613	0.000383034		0.00059963	0.00065532	0.000995156	0.00130006	0.000621878	0.00110636	0.00050415	0.000840322	0.00106057	0.00106367	0.00078301
748.586	607,14-608,07	PE36:0	PE31:1	0.0169266	0.00899021	0.00863869		0.0112134	0.010219		0.00796006	0.00620663	0.0165457	0.0121575	0.0102237	0.0159265	0.0108631	0.013096	0.00930517	0.0136407	0.0125587
746.57	605,12-606,05	PE36:1	PE31:1	0.0498458	0.0373789	0.0589438		0.0809204	0.0617297		0.0585171	0.0382992	0.158059	0.0854687	0.0979277	0.141942	0.0913479	0.101881	0.0670425	0.154786	0.0833583
744.554	603,11-604,03	PE36:2	PE31:1	0.130055	0.143856	0.165515		0.319819	0.192367		0.194486	0.124597	0.458718	0.347962	0.30052	0.394095	0.33296	0.290285	0.259387	0.43646	0.227531
742.539	601,09-602,02	PE36:3	PE31:1	0.0497551	0.0721387	0.077911		0.132917	0.0807459		0.0891873	0.0683256	0.211881	0.174185	0.149614	0.180208	0.151544	0.136522	0.117475	0.176037	0.090597
740.523	599,08-600,00	PE36:4	PE31:1	0.076094	0.0857113	0.0962881		0.156885	0.155517		0.171622	0.122597	0.244069	0.168473	0.106444	0.257617	0.154152	0.271103	0.239185	0.335468	0.117067
738.507	597,06-597,99	PE36:5	PE31:1	0.00762781	0.0113209	0.00727004		0.00879795	0.0100488		0.0106262	0.008906	0.0205146	0.0195021	0.00972284	0.0115238	0.0131036	0.0186508	0.0145471	0.0245766	0.0122837
736.492	595,04-595,97	PE36:6	PE31:1	0.00143456	0.00144349	0.00175549		0.00293223	0.00167553		0.00169614	0.00158557	0.00248024	0.00212165	0.00088376	0.00237724	0.00159849	0.00217947	0.00161448	0.00251234	0.00137935
776.617	635,17-636,10	PE38:0	PE31:1	0.00940168	0.0109472	0.00886711		0.0104404	0.00661215		0.00785502	0.00832716	0.00815038	0.00998914	0.00634492	0.00668584	0.0089844	0.00955563	0.00647164	0.00830459	0.00829263
774.601	633,15-634,08	PE38:1	PE31:1	0.0116556	0.00684058	0.00835747		0.00757471	0.0065819		0.00574512	0.00642319	0.0106738	0.0107635	0.0073777	0.00971878	0.010851	0.0105635	0.0070903	0.00791284	0.00815057
772.586	631,14-632,07	PE38:2	PE31:1	0.0144263	0.0106338	0.0151799		0.0161862	0.0137063		0.0119611	0.00857633	0.0348395	0.0225749	0.0159564	0.027138	0.0137401	0.0162936	0.0138461	0.0206652	0.0108234
770.57	629,12-630,05	PE38:3	PE31:1	0.0531026	0.0459213	0.0654702		0.0914305	0.0996599		0.0826517	0.0504114	0.15114	0.108638	0.0679691	0.145159	0.0873225	0.083362	0.108646	0.155857	0.0458449
768.554	627,11-628,03	PE38:4	PE31:1	0.267082	0.15623	0.346484		0.509305	0.36301		0.358565	0.200547	0.560395	0.433796	0.279577	0.623449	0.316581	0.483657	0.572333	0.567774	0.262617
766.539	625,09-626,02	PE38:5	PE31:1	0.0959053	0.104423	0.116593		0.153727	0.183628		0.148786	0.127009	0.256655	0.210185	0.105895	0.207892	0.157055	0.267955	0.193591	0.245398	0.149153
764.523	623,08-624,00	PE38:6	PE31:1	0.0985296	0.235332	0.100065		0.20411	0.317754		0.220767	0.134371	0.229304	0.323577	0.0847775	0.174303	0.25943	0.501969	0.406937	0.361217	0.213184
804.648	663,20-664,13	PE40:0	PE31:1	0.00204532	0.00219038	0.00292459		0.00404577	0.000983317		0.00126137	0.00175826	0.00385814	0.00268649	0.00219686	0.00231882	0.0019071	0.00227795	0.00212953	0.00182387	0.00239198
802.633	661,18-662,11	PE40:1	PE31:1	0.00125656	0.00130269	0.00210671		0.0013767	0.000822246		0.000949453	0.000872285	0.00140673	0.00144536	0.000905891	0.0022616	0.000692584	0.00144914	0.00119619	0.00137327	0.00101758
800.617	659,17-660,10	PE40:2	PE31:1	0.00196578	0.000776004	0.00133304		0.00168996	0.00116796		0.00116775	0.000891606	0.00235956	0.00207322	0.0011331	0.00175849	0.000492773	0.00173692	0.00121905	0.0016375	0.00160401
798.601	657,15-658,08	PE40:3	PE31:1	0.00526654	0.0027753	0.00552314		0.00560573	0.00382602		0.00258394	0.00252548	0.00867272	0.00440785	0.00343102	0.00636156	0.00202513	0.00253248	0.00244648	0.00274899	0.00222183
796.586	655,14-656,07	PE40:4	PE31:1	0.0198174	0.00575227	0.0345106		0.0309717	0.0302726		0.0148551	0.0111155	0.0443786	0.0218088	0.0195379	0.0440898	0.00910884	0.0145477	0.0122324	0.0177109	0.00815305
794.57	653,12-654,05	PE40:5	PE31:1	0.0289866	0.0228101	0.0444344		0.0536876	0.0935899		0.0455646	0.0347497	0.0656119	0.063269	0.0361397	0.0721922	0.0385401	0.0824475	0.0506417	0.0702733	0.0348861
792.554	651,11-652,03	PE40:6	PE31:1	0.0516475	0.108436	0.0710007		0.121677	0.223352		0.124177	0.0679022	0.118453	0.15108	0.0630546	0.12693	0.129708	0.28211	0.257352	0.200588	0.128144
832.679	691,23-692,16	PE42:0	PE31:1	0.000773183	0.000578562	0.000714723		0.00123909	0.000421141		0.000945342	0.00070765	0.0012059	0.000900359	0.000557698	0.000772543	0.000572413	0.000667653	0.000940955	0.000488	0.000449322
830.664	689,22-690,15	PE42:1	PE31:1	0.000442772	0.00149219	0.000897088		0.000848469	0.000618354		0.000636165	0.000402531	0.000759201	0.00109467	0.000883022	0.000927529	0.000512683	0.00109101	0.00108419	0.000602031	0.00021475
828.648	687,20-688,13	PE42:2	PE31:1	0.000319286	0.000633083	0.000853492		0.000686766	0.000351998		0.00044664	0.000379587	0.000680849	0.0010439	0.000413848	0.000890571	0.00027163	0.000620329	0.000676573	0.000548081	0.000211446
826.633	685,18-686,11	PE42:3	PE31:1	0.00111416	0.00188284	0.00223197		0.00263799	0.000878817		0.00135134	0.00126958	0.00271799	0.00192034	0.00199916	0.00354917	0.000763692	0.00139414	0.00172724	0.0014499	0.00207398
824.617	683,17-684,10	PE42:4	PE31:1	0.00117646	0.00081041	0.00158357		0.00166713	0.000926746		0.000477238	0.00044842	0.00156974	0.00140451	0.0010372	0.00159039	0.000733116	0.000677885	0.000963812	0.000850935	0.00100602
822.601	681,15-682,08	PE42:5	PE31:1	0.00233679	0.000819938	0.00207847		0.00244141	0.000958174		0.000925248	0.000828006	0.00358526	0.00179255	0.00105712	0.00315574	0.00140579	0.00131996	0.00122134	0.000955157	0.000876343
820.586	679,14-680,07	PE42:6	PE31:1	0.00182727	0.000811998	0.00175549		0.0027794	0.00162642		0.00121113	0.000859806	0.00429403	0.00245892	0.00120023	0.0030103	0.00110998	0.00152716	0.00095086	0.00135855	0.00115056
860.711	719,26-720,19	PE44:0	PE31:1	0.000579609	0.000691839	0.000814809		0.000545988	0.000645461		0.000629772	0.000436746	0.000608802	0.000583512	0.000608599	0.00115524	0.000392512	0.000584516	0.000722288	0.000830091	0.000468319
850.633	709,18-710,11	PE44:5	PE31:1	0.000863851	0.000529863	0.00068832		0.000574524	0.000410927		0.000532954	0.00031961	0.00042418	0.000764401	0.000388028	0.00153793	0.000460064	0.000509054	0.00079924	0.000774915	0.00100106
767.507	240,58-241,51	PI(O-)30:0	PI31:1	0.00318006	0.00112272	0.00542183		0.0019303	0.00165156		0.00455545	0.00358736	0.00307463	0.00120028	0.00169596	0.00913461	0.00745062	0.00699501	0.00496458	0.00345769	0.0106607
765.492	240,58-241,51	PI(O-)30:1	PI31:1	0.00939556	0.00623291	0.0090286		0.00586192	0.00395134		0.00423851	0.00439846	0.00583315	0.00927667	0.00602108	0.0137639	0.00854567	0.0171646	0.0144755	0.00640899	0.0136969
763.476	240,58-241,51	PI(O-)30:2	PI31:1	0.00993456	0.00734927	0.0066947		0.00746437	0.00855482		0.0090593	0.0111694	0.00407699	0.00599208	0.005456	0.0128686	0.0105288	0.0191867	0.00896841	0.00928243	0.0151324
761.46	240,58-241,51	PI(O-)30:3	PI31:1	0.010305	0.00772404	0.00576015		0.00197849	0.00204363		0.00437278	0.00706361	0.00472091	0.00560113	0.00779081	0.00640567	0.00618917	0.0105443	0.00440458	0.00728322	0.0124563
757.429	240,58-241,51	PI(O-)30:5	PI31:1	0.00461518	0.00355924	0.00514736		0.00363929	0.000875282		0.000947626	0.00328506	0.00175886	0.0017873	0.00429782	0.00457446	0.00384619	0.00547041	0.00303315	0.00940566	0.00679765
755.414	240,58-241,51	PI(O-)30:6	PI31:1	0.00429478	0.00320829	0.0070539		0.00210152	0.00171874		0.00401154	0.00268649	0.00412112	0.00399939	0.00339635	0.00631506	0.00312303	0.00738895	0.00262629	0.0108212	0.00430986
791.507	240,58-241,51	PI(O-)32:2	PI31:1	0.0614869	0.0459658	0.071702		0.0574841	0.0418002		0.0429167	0.0445505	0.0870793	0.0590409	0.0658025	0.131851	0.0625694	0.136666	0.0635293	0.0801853	0.0932748
789.492	240,58-241,51	PI(O-)32:3	PI31:1	0.00549683	0.00525999	0.0149895		0.00201908	0.00577772		0.00501397	0.00770122	0.00926351	0.00179663	0.0035225	0.00888782	0.00514674	0.0100238	0.00633906	0.0059075	0.00742538
787.476	240,58-241,51	PI(O-)32:4	PI31:1	0.00245472	0.00115183	0.00331818		0.00283584	0.000804568		0.00330687	0.00401364	0.0016661	0.00183281	0.00253177	0.00569274	0.00090875	0.00482322	0.00260191	0.00349754	0.00286443
785.46	240,58-241,51	PI(O-)32:5	PI31:1	0.00270781	0.00493974	0.00398747		0.00152953	0.00216856		0.0242716	0.00890479	0.00142024	0.00169685	0.00500674	0.00635321	0.0021965	0.041713	0.00500344	0.00433438	0.00704626
783.445	240,58-241,51	PI(O-)32:6	PI31:1	0.00403168	0.00289069	0.00165479		0.00193854	0.00144296		0.00241679	0.000631974	0.00295395	0.000916697	0.00220055	0.00425972	0.00314863	0.00754627	0.00408001	0.00219968	0.00765417
819.539	240,58-241,51	PI(O-)34:2	PI31:1	0.00690747	0.00526846	0.0121478		0.00535525	0.0039922		0.00468104	0.00557425	0.00457952	0.00321515	0.0046106	0.00910242	0.00397561	0.00712675	0.00570821	0.0112602	0.00985618
813.492	240,58-241,51	PI(O-)34:5	PI31:1	0.00292919	0.00112272	0.00394264		0.00119724	0.00261838		0.00221539	0.00104336	0.00260452	0.00272792	0.0023894	0.00345737	0.00391588	0.00649875	0.00157105	0.00285076	0.00241015
811.476	240,58-241,51	PI(O-)34:6	PI31:1	0.00231343	0.00225443	0.00250276		0.000461014	0.00161739		0.00203089	0.000487465	0.000916805	0.00164492	0.0019844	0.00351459	0.0033975	0.00836101	0.00628878	0.00252522	0.00579906
849.586	240,58-241,51	PI(O-)36:1	PI31:1	0.00870526	0.00314848	0.00724363		0.00776178	0.00561587		0.00739148	0.00525786	0.00840704	0.00690936	0.00897776	0.00917157	0.00839919	0.0125984	0.0105646	0.0096	0.00864615
847.57	240,58-241,51	PI(O-)36:2	PI31:1	0.0106582	0.00947296	0.0202351		0.0152217	0.0105639		0.0126694	0.0125099	0.0211432	0.0125321	0.0159431	0.0162675	0.0160823	0.0314654	0.0153288	0.0186924	0.0229468
845.554	240,58-241,51	PI(O-)36:3	PI31:1	0.0096264	0.00698297	0.00316406		0.00314783	0.0129112		0.0114432	0.0123963	0.0124894	0.0128985	0.0100924	0.0185243	0.0121153	0.0202726	0.0129128	0.0277326	0.0202335
843.539	240,58-241,51	PI(O-)36:4	PI31:1	0.0071283	0.00689669	0.0103316		0.00639776	0.00918574		0.00864417	0.0131044	0.00589169	0.00766618	0.0109445	0.0162771	0.0206019	0.0323351	0.0147947	0.0190142	0.0161921
841.523	240,58-241,51	PI(O-)36:5	PI31:1	0.00291084	0.00448981	0.00676899		0.00113129	0.00356045		0.00276022	0.00480058	0.00152741	0.00358043	0.00319422	0.0062936	0.00216308	0.00596795	0.0030202	0.00237624	0.00411576
877.617	240,58-241,51	PI(O-)38:1	PI31:1	0.011511	0.0154513	0.0179485		0.0183137	0.0350894		0.0133257	0.0301548	0.033485	0.0330845	0.0344748	0.042714	0.0474683	0.09374	0.0333357	0.0501709	0.0399913
875.601	240,58-241,51	PI(O-)38:2	PI31:1	0.00326795	0.00370798	0.00548568		0.0020362	0.00125439		0.00334478	0.00368276	0.00413463	0.00255345	0.00243587	0.00621015	0.00658097	0.0107438	0.00757716	0.00131257	0.00754432
873.586	240,58-241,51	PI(O-)38:3	PI31:1	0.0201523	0.0258871	0.0511887		0.0278397	0.0155315		0.0155589	0.0204619	0.0373783	0.0288698	0.0334206	0.0463609	0.0347473	0.101995	0.0485015	0.0341907	0.0597772
871.57	240,58-241,51	PI(O-)38:4	PI31:1	0.0236054	0.0238936	0.0315227		0.0216778	0.0143015		0.0177222	0.0188562	0.0541788	0.0240652	0.0358579	0.0507506	0.0371891	0.0487745	0.0478622	0.0289287	0.0431828
869.554	240,58-241,51	PI(O-)38:5	PI31:1	0.00990286	0.00523776	0.00486122		0.00279652	0.0131045		0.00836879	0.00832032	0.00486051	0.0113645	0.0126043	0.0131452	0.00471725	0.0140437	0.00528459	0.0192674	0.00884933
903.633	240,58-241,51	PI(O-)40:2	PI31:1	0.00396771	0.0049895	0.00439027		0.00305906	0.00379812		0.00179935	0.00388241	0.00334481	0.00914363	0.0059119	0.00790426	0.00523136	0.00357361	0.00209677	0.00192196	0.00660437
901.617	240,58-241,51	PI(O-)40:3	PI31:1	0.00301041	0.00141756	0.00413299		0.00164748	0.00309138		0.00174043	0.00124503	0.00293684	0.00575985	0.0073445	0.00511929	0.00222992	0.00496135	0.00116724	0.004514	0.00528945
899.601	240,58-241,51	PI(O-)40:4	PI31:1	0.00278513	0.00503397	0.0050571		0.00132661	0.00243256		0.00222224	0.000975333	0.00134008	0.00897208	0.0042602	0.00569751	0.000975591	0.00231376	0.00252191	0.00602031	0.00162962
897.586	240,58-241,51	PI(O-)40:5	PI31:1	0.0111032	0.0191677	0.0183089		0.00592533	0.00637761		0.00219575	0.00378621	0.00240549	0.0399344	0.0486717	0.0322894	0.000796401	0.00991631	0.00131581	0.00918863	0.00514903
933.68	240,58-241,51	PI(O-)42:1	PI31:1	0.00121596	0.00158165	0.00216812		0.00120168	0.00119899		0.000652606	0.0018605	0.00220015	0.00064303	0.00279292	0.0044755	0.000658453	0.00216028	0.000752002	0.00196549	0.00194101
931.664	240,58-241,51	PI(O-)42:2	PI31:1	0.00183172	0.000870225	0.0016462		0.000623986	0.000410927		0.00376721	0.00134727	0.00235235	0.00197811	0.00203014	0.00504299	0.00160987	0.00665351	0.000736764	0.00201453	0.00368048
929.648	240,58-241,51	PI(O-)42:3	PI31:1	0.00284242	0.00177644	0.00591366		0.00168933	0.000997067		0.00284059	0.00206015	0.00281165	0.00324433	0.00634271	0.00742857	0.00222423	0.0108845	0.00403277	0.00864055	0.00309983
923.601	240,58-241,51	PI(O-)42:6	PI31:1	0.00282295	0.000578033	0.00328994		0.000909346	0.000651354		0.00129608	0.00104336	0.00037915	0.00175637	0.00256866	0.00262879	0.000806356	0.00349942	0.000649145	0.00133035	0.001101
961.711	240,58-241,51	PI(O-)44:1	PI31:1	0.00532995	0.00335862	0.00645768		0.00142426	0.00297234		0.00379461	0.00552313	0.00380231	0.00596116	0.00713205	0.0101492	0.0055293	0.0138314	0.00340725	0.00577631	0.00413228
955.664	240,58-241,51	PI(O-)44:4	PI31:1	0.00279625	0.0050075	0.00481394		0.00270711	0.000652925		0.00096087	0.00175665	0.00401755	0.0075063	0.00783064	0.00608378	0.00571204	0.00686967	0.00304763	0.00220458	0.00695458
753.455	240,58-241,51	PI28:0	PI31:1	0.00700593	0.00261068	0.00959903		0.00469321	0.00726979		0.00742984	0.00719685	0.00893299	0.0053829	0.00774433	0.00660715	0.00560894	0.00977178	0.00705983	0.00656164	0.00920697
751.44	240,58-241,51	PI28:1	PI31:1	0.00290528	0.00380274	0.00346616		0.00572431	0.00372073		0.00753899	0.00335791	0.00298097	0.0030967	0.00553789	0.00983085	0.00692442	0.00449707	0.00308648	0.0113055	0.011262
749.424	240,58-241,51	PI28:2	PI31:1	0.00808727	0.00350419	0.00711162		0.00364309	0.00291066		0.00598671	0.00840847	0.00240278	0.00293448	0.004047	0.00987138	0.00525127	0.0108001	0.00581716	0.0142593	0.00984048
747.408	240,58-241,51	PI28:3	PI31:1	0.011739	0.00454857	0.0100859		0.00190367	0.00451784		0.00717455	0.0029268	0.0030287	0.00460391	0.0040293	0.0186626	0.00842834	0.0160467	0.0106537	0.011178	0.00931352
745.393	240,58-241,51	PI28:4	PI31:1	0.00346542	0.00323952	0.00561954		0.00103047	0.00125517		0.000985074	0.00351047	0.00260812	0.000641863	0.00362135	0.0073487	0.00121878	0.007898	0.00497068	0.00256323	0.00505818
743.377	240,58-241,51	PI28:5	PI31:1	0.00358668	0.00409546	0.00407711		0.00312818	0.00184485		0.00320046	0.00165078	0.00344117	0.00294032	0.00671525	0.00802825	0.00416617	0.00961702	0.00792993	0.00310824	0.00720072
741.361	240,58-241,51	PI28:6	PI31:1	0.00678732	0.00623238	0.00388063		0.00484287	0.00252252		0.00421248	0.00279397	0.00497848	0.00281311	0.00386258	0.0162484	0.00600714	0.0088739	0.00846859	0.0105435	0.00905665
781.487	240,58-241,51	PI30:0	PI31:1	0.00662045	0.00350843	0.0048078		0.00318525	0.00355416		0.00489934	0.00691468	0.00807112	0.00456715	0.0041702	0.00944816	0.00426928	0.0141218	0.00499735	0.00554641	0.0141834
779.471	240,58-241,51	PI30:1	PI31:1	0.0119504	0.0120969	0.0243988		0.0128526	0.0108004		0.0137061	0.0137211	0.0284858	0.00876318	0.0134157	0.0171009	0.0153627	0.013779	0.0102896	0.0195035	0.0165638
777.455	240,58-241,51	PI30:2	PI31:1	0.0297025	0.0165835	0.0240789		0.0303502	0.0273435		0.0379959	0.0380585	0.0192979	0.0205653	0.0228206	0.0253211	0.0255872	0.0257533	0.0261745	0.0339117	0.0252934
775.44	240,58-241,51	PI30:3	PI31:1	0.0121412	0.0109959	0.00796327		0.00775734	0.0070659		0.00969455	0.00856385	0.0188197	0.00445628	0.0189883	0.0177148	0.0154132	0.0234779	0.0205288	0.0186341	0.0181513
773.424	240,58-241,51	PI30:4	PI31:1	0.00300151	0.00172933	0.00209321		0.00116046	0.000771961		0.00321873	0.00114601	0.000562871	0.0030331	0.00219022	0.0026121	0.00187723	0.00409417	0.00335696	0.0042277	0.00326419
771.408	240,58-241,51	PI30:5	PI31:1	0.00439212	0.00188019	0.00388677		0.000824372	0.000429391		0.00161256	0.00187016	0.00173364	0.000790659	0.00230751	0.00883894	0.00247382	0.00540006	0.0021242	0.000786564	0.00476248
769.393	240,58-241,51	PI30:6	PI31:1	0.00245861	0.00205276	0.00427913		0.00143441	0.00123985		0.00223457	0.00321018	0.00693097	0.00162508	0.00104236	0.00584772	0.00228254	0.0179883	0.00343315	0.00348467	0.00279835
793.487	240,58-241,51	PI31:1	PI31:1	0.00206868	0.00270225	0.00397887		0.00250926	0.00193599		0.00173221	0.00210242	0.00184081	0.00137534	0.00303562	0.00852659	0.0036414	0.0106492	0.00465449	0.00635749	0.00380189
809.518	240,58-241,51	PI32:0	PI31:1	0.0021371	0.00124605	0.00245855		0.000730521	0.00153292		0.00169705	0.00138954	0.00178678	0.00333827	0.000690484	0.000659285	0.000986968	0.00318095	0.00192915	0.00509764	0.00184189
807.502	240,58-241,51	PI32:1	PI31:1	0.00230119	0.00525576	0.00391563		0.00177303	0.00275981		0.0019222	0.0018766	0.00144635	0.00142669	0.00114195	0.00507041	0.00410929	0.00477462	0.00316344	0.00507189	0.00267528
805.487	240,58-241,51	PI32:2	PI31:1	0.0109486	0.0170461	0.0154144		0.0124506	0.0217976		0.0154347	0.0156089	0.0223284	0.0173373	0.0180359	0.0378844	0.0300286	0.0412564	0.0208092	0.0320652	0.0231434
803.471	240,58-241,51	PI32:3	PI31:1	0.0262938	0.0164766	0.0232064		0.0177259	0.0643489		0.0391568	0.0446612	0.052873	0.0258093	0.0292718	0.0645479	0.0391374	0.0812516	0.0348999	0.103368	0.0449074
801.455	240,58-241,51	PI32:4	PI31:1	0.0455944	0.0214438	0.0280136		0.0277262	0.0347422		0.0436584	0.0479274	0.0366803	0.026017	0.0315822	0.0337511	0.0311599	0.0442148	0.0339041	0.0835762	0.0338924
799.44	240,58-241,51	PI32:5	PI31:1	0.0229001	0.0134271	0.0448126		0.0378729	0.0223468		0.0459678	0.0429001	0.0187702	0.0198406	0.0233481	0.0231632	0.0217083	0.0602013	0.0163551	0.0319622	0.0184618
797.424	240,58-241,51	PI32:6	PI31:1	0.0022578	0.000713013	0.00188505		0.00076413	0.00179181		0.00487833	0.00260518	0.00122121	0.00229787	0.000981874	0.00604205	0.0033456	0.0083559	0.00291201	0.00481011	0.0043652
837.549	240,58-241,51	PI34:0	PI31:1	0.00198858	0.0034412	0.0022725		0.00052633	0.00137656		0.00105312	0.000972112	0.000208037	0.00193084	0.00384856	0.0004125	0.000785735	0.00139286	0.00336153	0.00208136	0.00170148
835.534	240,58-241,51	PI34:1	PI31:1	0.00230008	0.00194954	0.00308608		0.000447698	0.00147674		0.00117551	0.00111662	0.00112214	0.000480814	0.00170187	0.00537084	0.00246244	0.00350838	0.00115277	0.00288693	0.00253404
833.518	240,58-241,51	PI34:2	PI31:1	0.0105014	0.0119397	0.0140924		0.0113015	0.0215752		0.0166595	0.0244586	0.0276987	0.0154111	0.0210029	0.0376198	0.0325948	0.034498	0.0171589	0.0323717	0.0216773
831.502	240,58-241,51	PI34:3	PI31:1	0.0868891	0.108994	0.0991703		0.107996	0.253263		0.137981	0.184003	0.27218	0.157482	0.166366	0.352312	0.258514	0.298634	0.168673	0.367109	0.204537
829.487	240,58-241,51	PI34:4	PI31:1	0.0445687	0.0902001	0.113482		0.0987294	0.138654		0.0803477	0.12455	0.144193	0.137817	0.207582	0.273733	0.212789	0.336456	0.1627	0.23183	0.135912
827.471	240,58-241,51	PI34:5	PI31:1	0.00572711	0.00593754	0.00977464		0.00331842	0.0088801		0.0060269	0.00573285	0.00548011	0.00645423	0.00657951	0.0126051	0.00800454	0.0153906	0.00831164	0.0139994	0.00724449
825.455	240,58-241,51	PI34:6	PI31:1	0.0100731	0.00544155	0.00852817		0.00227337	0.00828964		0.0107737	0.00644653	0.00698411	0.00419195	0.00658541	0.00928602	0.00502373	0.00596411	0.00569906	0.0183797	0.00252661
865.581	240,58-241,51	PI36:0	PI31:1	0.00959581	0.00659921	0.00877562		0.00181362	0.00562804		0.00586752	0.0079037	0.00388606	0.00667771	0.0110381	0.0136757	0.00705953	0.00963493	0.0139528	0.0150269	0.0120987
863.565	240,58-241,51	PI36:1	PI31:1	0.00400108	0.00383079	0.00342993		0.00270394	0.000741711		0.00268669	0.00404423	0.00347179	0.00378174	0.0014267	0.00367196	0.00430696	0.00212575	0.00363963	0.00326028	0.00414632
861.549	240,58-241,51	PI36:2	PI31:1	0.00925316	0.0122985	0.0073431		0.0132388	0.0140662		0.0110938	0.0150522	0.0245403	0.0118313	0.0107534	0.0236341	0.0185768	0.0159661	0.0111856	0.0284003	0.0153736
859.534	240,58-241,51	PI36:3	PI31:1	0.0769128	0.113447	0.0804106		0.0979843	0.109203		0.100469	0.144967	0.214271	0.136465	0.135611	0.257538	0.195707	0.206875	0.150474	0.219969	0.185944
857.518	240,58-241,51	PI36:4	PI31:1	0.134479	0.403478	0.245345		0.232697	0.212576		0.178585	0.263468	0.411615	0.515038	0.275462	0.655995	0.555618	0.634264	0.399907	0.461282	0.456311
855.502	240,58-241,51	PI36:5	PI31:1	0.0712585	0.0833008	0.0964575		0.0897044	0.153016		0.0852913	0.112214	0.157391	0.130255	0.156923	0.160516	0.111835	0.173595	0.0735286	0.159885	0.0859915
853.487	240,58-241,51	PI36:6	PI31:1	0.125438	0.0928378	0.177623		0.0906765	0.332818		0.197962	0.201468	0.193027	0.163974	0.244789	0.18046	0.113957	0.442479	0.114332	0.283277	0.143184
893.612	240,58-241,51	PI38:0	PI31:1	0.00250367	0.00326705	0.0012477		0.00266462	0.00324734		0.00145912	0.00236165	0.0021263	0.0032239	0.00324217	0.00834299	0.00280234	0.00375907	0.00156496	0.00856698	0.00586927
891.596	240,58-241,51	PI38:1	PI31:1	0.00111138	0.00131539	0.000276925		0.00201718	0.00250524		0.00233641	0.00562175	0.00373566	0.00253127	0.00327758	0.00393544	0.0021965	0.00686711	0.00116724	0.00417743	0.00313534
889.581	240,58-241,51	PI38:2	PI31:1	0.00257765	0.00322206	0.00231241		0.00257331	0.00408727		0.00248483	0.00385786	0.00561791	0.00222435	0.00537485	0.00875668	0.00492275	0.00597179	0.00383315	0.00323392	0.00590974
887.565	240,58-241,51	PI38:3	PI31:1	0.00899506	0.0129396	0.0082144		0.0101949	0.00536797		0.00776048	0.00505096	0.0110575	0.0157974	0.0109017	0.014943	0.00579524	0.017492	0.00963812	0.016695	0.00837688
885.549	240,58-241,51	PI38:4	PI31:1	0.0315459	0.0448325	0.0295388		0.0259373	0.0486944		0.0333395	0.0398832	0.0664431	0.0771199	0.0349284	0.0442245	0.027409	0.0317532	0.0211863	0.0733123	0.0289069
883.534	240,58-241,51	PI38:5	PI31:1	0.184806	0.306247	0.261396		0.22916	0.39332		0.272752	0.305038	0.402756	0.539626	0.312726	0.401973	0.269063	0.356069	0.184792	0.721323	0.27336
881.518	240,58-241,51	PI38:6	PI31:1	0.578701	0.848466	1.06676		0.954999	1.20835		0.972821	1.07359	0.864378	1.60145	1.47218	1.35348	0.901047	1.88566	0.897538	1.89899	1.37872
921.643	240,58-241,51	PI40:0	PI31:1	0.000646915	0.00194266	0.00161611		0.000526964	0.000962103		0.000732983	0.00121323	0.00069706	0.00310545	0.00245136	0.00376853	0.000316427	0.00301339	0.00173486	0.00183736	0.000968025
919.628	240,58-241,51	PI40:1	PI31:1	0.000817683	0.0021348	0.0035423		0.00059545	0.000204285		0.000956303	0.00140081	0.00069796	0.00169685	0.00134334	0.00284696	0.00181181	0.00613934	0.00140419	0.0028808	0.00160319
917.612	240,58-241,51	PI40:2	PI31:1	0.00160255	0.00257045	0.0027631		0.00308505	0.000762139		0.000785959	0.00287447	0.00269368	0.00863948	0.00333512	0.00500603	0.00239916	0.00552413	0.00336001	0.00442634	0.0053167
915.596	240,58-241,51	PI40:3	PI31:1	0.00201695	0.00510119	0.00609357		0.00529754	0.0021112		0.000906524	0.00353261	0.00749564	0.0110786	0.00539551	0.00907142	0.00676585	0.0122966	0.00519316	0.00661927	0.00517216
913.581	240,58-241,51	PI40:4	PI31:1	0.00486048	0.00947349	0.00861782		0.00429815	0.00991056		0.0064265	0.00771934	0.0158847	0.0135877	0.0082681	0.0255666	0.0137017	0.014164	0.00879317	0.0183104	0.00960508
911.565	240,58-241,51	PI40:5	PI31:1	0.0121334	0.0105157	0.0161304		0.00520115	0.0127207		0.0108829	0.0110479	0.0130055	0.00804488	0.0177659	0.0195818	0.0139889	0.0339761	0.0119292	0.0229795	0.0189921
909.549	240,58-241,51	PI40:6	PI31:1	0.031374	0.0341304	0.0298207		0.0162896	0.0416159		0.0281465	0.0259073	0.0328023	0.04193	0.0203176	0.0644394	0.0333493	0.0570818	0.0431902	0.0534367	0.0499326
949.674	240,58-241,51	PI42:0	PI31:1	0.00312777	0.00290922	0.0077195		0.000918858	0.00354984		0.00347219	0.00417787	0.00162647	0.00378524	0.00167826	0.00278259	0.00229605	0.00409034	0.00360306	0.0101426	0.00658703
947.659	240,58-241,51	PI42:1	PI31:1	0.000903344	0.000745302	0.0021411		0.00123656	0.000321356		0.00118693	0.000875907	0.00240369	0.000746895	0.00213858	0.00469845	0.00254422	0.00371046	0.00176	0.000828865	0.00209546
945.643	240,58-241,51	PI42:2	PI31:1	0.00038826	0.00391601	0.000622006		0.000364626	0.00110707		0.000998775	0.000736632	0.000971741	0.00169685	0.000463273	0.00283504	0.00169662	0.00249922	0.00140267	0.00162462	0.00265629
943.628	240,58-241,51	PI42:3	PI31:1	0.00198413	0.00280018	0.00213434		0.0020863	0.0023371		0.00346489	0.00265952	0.00165349	0.00598333	0.00294931	0.00805805	0.00221641	0.00479636	0.00105829	0.00422586	0.00790196
941.612	240,58-241,51	PI42:4	PI31:1	0.00992177	0.00838359	0.0118378		0.0146941	0.00966149		0.00955024	0.00896276	0.0259758	0.0192401	0.0225573	0.0228532	0.0184815	0.0352053	0.015325	0.0133391	0.0261094
939.596	240,58-241,51	PI42:5	PI31:1	0.0159376	0.0331824	0.026788		0.0338056	0.0155681		0.0137888	0.0238846	0.0315127	0.0420339	0.0501294	0.0501903	0.0470886	0.0639105	0.0497815	0.0529168	0.0371442
937.581	240,58-241,51	PI42:6	PI31:1	0.00460183	0.00412404	0.00489868		0.00169313	0.00584254		0.00312968	0.00441456	0.00826565	0.00552411	0.0123335	0.0115691	0.00550441	0.00844799	0.00312153	0.00668794	0.00777806
973.674	240,58-241,51	PI44:2	PI31:1	0.000436097	0.00167111	0.000644724		0.00093598	0.000638783		0.000571772	0.000563141	0.00268737	0.000581761	0.00182211	0.0009013	0.00127424	0.00204389	0.00164724	0.00119364	0.00149086
971.659	240,58-241,51	PI44:3	PI31:1	0.000926707	0.000717248	0.00367923		0.000363992	0.00170735		0.00207793	0.00341065	0.0018237	0.000756231	0.000951628	0.00282431	0.00195332	0.00237388	0.00334706	0.00369372	0.00168826
969.643	240,58-241,51	PI44:4	PI31:1	0.00358557	0.00249157	0.00193663		0.00475092	0.00222042		0.00246794	0.00175262	0.00321692	0.00331727	0.00393266	0.00638302	0.00381206	0.00867949	0.00311239	0.00742913	0.00231269
967.628	240,58-241,51	PI44:5	PI31:1	0.00100792	0.00233648	0.00132015		0.00419288	0.00433987		0.00300957	0.00302261	0.00230732	0.00257679	0.00535862	0.00401412	0.00206709	0.00415812	0.00375468	0.00560158	0.0057429
965.612	240,58-241,51	PI44:6	PI31:1	0.0107912	0.0192667	0.0142165		0.0101753	0.0227813		0.0106522	0.0189246	0.0217475	0.0279216	0.0230515	0.0174657	0.0154672	0.0254898	0.0148404	0.0415113	0.0215311
677.56	183,64-184,57	SM32:0	C12SM	0.0150999	0.012631	0.0149822		0.0101778	0.0136812		0.0168335	0.0202952	0.0214666	0.0155564	0.00752966	0.0162985	0.0132508	0.0132699	0.012832	0.0184263	0.0224752
705.59	183,64-184,57	SM34:0	C12SM	0.170486	0.215159	0.153503		0.186149	0.167735		0.166609	0.229995	0.293886	0.26768	0.161565	0.324744	0.264537	0.261061	0.305283	0.288836	0.296437
733.62	183,64-184,57	SM36:0	C12SM	0.0282023	0.0321385	0.0277809		0.0389662	0.0485361		0.0386134	0.0324855	0.0474964	0.0505035	0.0444041	0.0614279	0.0620403	0.0781244	0.100028	0.0920218	0.107594
789.68	183,64-184,57	SM40:0	C12SM	0.0393383	0.0411208	0.0432346		0.107372	0.139272		0.034205	0.0359903	0.0384482	0.0367963	0.0317593	0.0473099	0.0380978	0.0421146	0.03697	0.0453031	0.0392075
817.72	183,64-184,57	SM42:0	C12SM	0.0241444	0.02963	0.0280498		0.0235783	0.0367489		0.0207765	0.0259431	0.0265765	0.0236906	0.01481	0.0224777	0.0247474	0.0197853	0.0217098	0.0276762	0.0230443
845.75	183,64-184,57	SM44:0	C12SM	0.00127158	0.00108143	0.00136252		0.00204444	0.00141114		0.000957216	0.00131024	0.0022758	0.00156031	0.00103499	0.00121485	0.00117682	0.00101299	0.00141181	0.00141128	0.00172873
843.73	183,64-184,57	SM44:1	C12SM	0.00421079	0.00270913	0.002636		0.00492023	0.0037557		0.00196878	0.0030222	0.00666349	0.00500011	0.00238645	0.00375542	0.00297299	0.00279212	0.00405106	0.00454098	0.00479139
841.72	183,64-184,57	SM44:2	C12SM	0.00640351	0.00663785	0.00539051		0.00615552	0.00615644		0.00391107	0.00769197	0.0106225	0.0105995	0.00493371	0.00752514	0.00671892	0.00685688	0.00851583	0.0094124	0.0116502
839.7	183,64-184,57	SM44:3	C12SM	0.00432649	0.00674795	0.00537762		0.00490311	0.00637761		0.00332879	0.00597557	0.00797566	0.010369	0.00469101	0.00624949	0.005215	0.00615597	0.00558249	0.00603196	0.00867588
Table S9. Lipids detected in Rome's cohort in the basal state (B) and after pancreaticoduodenectomy (PTX). Lipid concentrations were calculated relative to the relevant internal standards and then normalized to the total phosphate content of each total lipid extract and expressed as percentage of total lipid amount detected.

## Sheet: Table S10
m/z [M+H]+	ion [pmol/nmol phosphate]	standard_ion	NonT2D_1	NonT2D_2	NonT2D_3	NonT2D_4	NonT2D_5	NonT2D_6	NonT2D_7	NonT2D_8	NonT2D_9	NonT2D_10	NonT2D_11	NonT2D_12	NonT2D_13	NonT2D_14	NonT2D_15	NonT2D_16	NonT2D_17	NonT2D_18	NonT2D_19	NonT2D_20	NonT2D_21	NonT2D_22	NonT2D_23	NonT2D_24	NonT2D_25	NonT2D_26	NonT2D_27	NonT2D_28	NonT2D_29	NonT2D_30	NonT2D_31	T2D_1	T2D_2	T2D_3	T2D_4	T2D_5	T2D_6	T2D_7	T2D_8	T2D_9	T2D_10	T2D_11	T2D_12	T2D_13	T2D_14	T2D_15	T2D_16
538.52	Cer16:0	C17Cer	0.0340883	0.0287867	0.0485354	0.034459	0.0591691	0.0356748	0.0407345	0.0479328	0.038882	0.0328702	0.0315979	0.0372856	0.0276467	0.032166	0.0287776	0.0365054	0.0463562	0.030924	0.0333971	0.0506106	0.0303706	0.0329076	0.0458417	0.0332024	0.0317743	0.0264519	0.0286374	0.0244175	0.0236165	0.0329645	0.0367465	0.0406673	0.0371322	0.0428636	0.0355805	0.0581198	0.0344271	0.0392595	0.0507685	0.030877	0.0368784	0.0290336	0.0275717	0.0425364	0.0235402	0.0341767	0.0247599
520.51	Cer16:0(-H2O)	C17Cer	0.0528603	0.0358677	0.0667306	0.0672097	0.0753209	0.0501957	0.0579482	0.066998	0.0783554	0.0891175	0.0675811	0.0781056	0.0506452	0.0634402	0.0740722	0.0538249	0.0583319	0.0457614	0.0446284	0.0729766	0.0417175	0.04038	0.054003	0.0677765	0.0643725	0.0623467	0.0586836	0.0522568	0.0548167	0.0772828	0.0667149	0.0616587	0.0547498	0.0509682	0.0502625	0.066402	0.0473027	0.048634	0.0661472	0.0737623	0.0768885	0.0553336	0.051802	0.084792	0.0594598	0.0743569	0.0560357
566.55	Cer18:0	C17Cer	0.0105316	0.00888128	0.0113467	0.0115656	0.0142799	0.0100907	0.0141017	0.0169344	0.0135943	0.0094056	0.00910591	0.0127808	0.012299	0.00923266	0.0127074	0.0126773	0.0121899	0.00812958	0.00798128	0.011686	0.0128855	0.0130612	0.0137956	0.0135186	0.013008	0.00664675	0.0175652	0.0116259	0.0122564	0.0142616	0.0127	0.014877	0.0151451	0.0174854	0.0125385	0.0165305	0.0109819	0.0162678	0.019826	0.0117978	0.0158967	0.0128925	0.0122043	0.0210565	0.0119889	0.0132219	0.0150042
548.54	Cer18:0(-H2O)	C17Cer	0.0124429	0.00946111	0.0123269	0.0145865	0.0152938	0.0104105	0.0107469	0.0158015	0.0213148	0.0138706	0.0176749	0.0202475	0.0145419	0.0104009	0.0156796	0.0160067	0.0112131	0.0107893	0.00569708	0.0125776	0.010927	0.0097432	0.0156823	0.0156671	0.0153844	0.0126426	0.0204711	0.0192447	0.0228275	0.0162665	0.0187729	0.0165161	0.0125956	0.0143697	0.0129086	0.0158216	0.0138621	0.0167255	0.0172538	0.0168137	0.0190207	0.0175451	0.0183857	0.0254456	0.0148227	0.0134324	0.0159159
594.58	Cer20:0	C17Cer	0.0101582	0.013304	0.0143342	0.0127138	0.0193575	0.0130414	0.0131867	0.01609	0.0144058	0.0115897	0.0108366	0.0197322	0.0154405	0.00965523	0.0161732	0.0127915	0.0154169	0.00995898	0.010264	0.0117195	0.00959373	0.0102339	0.0173243	0.0110121	0.0152488	0.00921149	0.0192191	0.00949932	0.0151928	0.0131339	0.0122604	0.0175904	0.0113156	0.0128093	0.0120266	0.011091	0.0113092	0.0163418	0.0160296	0.0122044	0.0143711	0.0136579	0.0152376	0.0146239	0.0106908	0.0158995	0.0152355
576.57	Cer20:0(-H2O)	C17Cer	0.0104859	0.00865359	0.0150856	0.00908213	0.0137158	0.0101149	0.0161578	0.0126814	0.0198625	0.0191214	0.00971228	0.0167921	0.0136091	0.00868628	0.0167127	0.0122985	0.0161683	0.00675525	0.0101959	0.0114693	0.0100481	0.0108265	0.0142731	0.0177406	0.0186289	0.00986153	0.0148139	0.0136245	0.0162995	0.0111152	0.0111792	0.0150663	0.013858	0.01422	0.0134091	0.0195333	0.0122079	0.0128402	0.0179787	0.0109441	0.0131859	0.0134261	0.0194852	0.0232681	0.0149295	0.0145887	0.0128186
622.61	Cer22:0	C17Cer	0.085394	0.0928291	0.118431	0.0786319	0.140144	0.0701549	0.105589	0.1136	0.122847	0.118503	0.0622679	0.108387	0.0850963	0.067586	0.126128	0.0919586	0.107384	0.0812839	0.113157	0.108305	0.0701871	0.0857513	0.136713	0.092195	0.110924	0.100763	0.108063	0.0525328	0.0854939	0.0870461	0.101456	0.127768	0.133938	0.129415	0.0717213	0.161094	0.0962581	0.0996792	0.136191	0.0702076	0.109016	0.0782531	0.11218	0.120975	0.0827841	0.123097	0.100843
604.6	Cer22:0(-H2O)	C17Cer	0.0593172	0.0855226	0.0859373	0.0661854	0.116606	0.0576534	0.0994002	0.076421	0.122502	0.115826	0.0520871	0.0955776	0.0676928	0.0660262	0.122947	0.0767918	0.0729691	0.0637302	0.0999827	0.0964665	0.0607828	0.064369	0.116644	0.0894048	0.0962207	0.0792819	0.0907463	0.0500275	0.0826317	0.081618	0.120616	0.0985609	0.111326	0.0816359	0.0600583	0.129008	0.0672573	0.0843429	0.11555	0.0608425	0.124496	0.072951	0.10204	0.130974	0.0823011	0.10027	0.080189
620.6	Cer22:1	C17Cer	0.00673559	0.00790464	0.00905212	0.00913605	0.0112655	0.00936034	0.010486	0.00915114	0.0122067	0.00881049	0.00593681	0.0140535	0.00660964	0.00793566	0.0107233	0.00860621	0.00776262	0.00539038	0.00719288	0.00770877	0.00682646	0.00796019	0.00867405	0.00996692	0.0089584	0.00805351	0.00774687	0.00774742	0.00780921	0.00907914	0.00940326	0.00971181	0.0072617	0.00855329	0.0089879	0.0118077	0.00752708	0.00957333	0.0126052	0.00854916	0.0094998	0.00866732	0.00842072	0.011459	0.00910364	0.0097911	0.00826593
602.59	Cer22:1(-H2O)	C17Cer	0.00617993	0.00404127	0.0109281	0.00583049	0.00542926	0.00795336	0.0106011	0.0109102	0.0124565	0.0107319	0.00765774	0.011366	0.00876746	0.0091621	0.0118659	0.0063203	0.00991137	0.00550835	0.00705706	0.00802291	0.00799246	0.0073024	0.00670506	0.0131775	0.0084129	0.0108062	0.0107252	0.00848271	0.0083243	0.00841527	0.00978425	0.00752603	0.0062908	0.00787927	0.00571818	0.0156808	0.00708876	0.00659223	0.0150089	0.00863092	0.00912909	0.0121203	0.0144265	0.0267753	0.00631779	0.00834724	0.00799406
650.65	Cer24:0	C17Cer	0.254867	0.465019	0.50068	0.374665	0.481835	0.218554	0.507903	0.412152	0.414477	0.428318	0.210332	0.291656	0.300213	0.266113	0.424491	0.34719	0.296474	0.308449	0.413512	0.385983	0.282521	0.401718	0.344108	0.302308	0.317762	0.338035	0.32369	0.169663	0.281905	0.306122	0.340531	0.452894	0.369391	0.326934	0.268508	0.469872	0.249637	0.363252	0.373779	0.232725	0.374757	0.224032	0.290487	0.364072	0.29041	0.31825	0.305697
632.63	Cer24:0(-H2O)	C17Cer	0.199155	0.252882	0.389954	0.280491	0.369097	0.189912	0.40071	0.350689	0.411562	0.369193	0.224676	0.280742	0.309511	0.252798	0.407839	0.339224	0.262046	0.212172	0.352565	0.336732	0.267035	0.240166	0.309553	0.298397	0.345474	0.296111	0.309537	0.181255	0.293526	0.275125	0.328865	0.350171	0.316703	0.250635	0.199339	0.394291	0.206362	0.287831	0.315374	0.240943	0.360292	0.215886	0.341163	0.38195	0.314635	0.323774	0.297801
630.62	Cer24:1(-H2O)	C17Cer	0.132339	0.121107	0.150508	0.147347	0.169938	0.115905	0.168857	0.205495	0.185205	0.144858	0.105133	0.202778	0.148246	0.124623	0.18169	0.121394	0.0925367	0.0847929	0.0949737	0.120601	0.142904	0.169875	0.120866	0.198373	0.111889	0.124789	0.155215	0.129736	0.14023	0.111203	0.147896	0.162503	0.118579	0.150765	0.122315	0.111966	0.10374	0.158738	0.140632	0.139955	0.148299	0.104031	0.153517	0.181065	0.147313	0.167083	0.166663
678.68	Cer26:0	C17Cer	0.00726487	0.00937692	0.00868941	0.0139395	0.02003	0.0148366	0.00981699	0.0144325	0.0146361	0.00942603	0.0081441	0.0144181	0.0130395	0.00972635	0.0235553	0.0127548	0.00756063	0.00928785	0.0134567	0.0161273	0.0120563	0.0114985	0.0150124	0.0201022	0.0276177	0.0120373	0.0103925	0.0125708	0.0106508	0.0158091	0.0141862	0.0554363	0.0197885	0.0215274	0.0212732	0.0140137	0.0177087	0.0252563	0.0277522	0.0138264	0.0138468	0.0116025	0.0088534	0.00843985	0.00906227	0.0210157	0.00983979
606.62	DHCer22:0(-H2O)	C17Cer	0.0133722	0.0116882	0.028157	0.0129393	0.0139322	0.0158914	0.0277917	0.035097	0.0379954	0.0216377	0.0159351	0.0288778	0.0352881	0.0172946	0.0206595	0.039414	0.0265037	0.00983581	0.0388144	0.0162563	0.0212936	0.0333554	0.0192041	0.0330253	0.0298939	0.0174408	0.0283433	0.0184171	0.027376	0.0234138	0.0485278	0.035915	0.0201587	0.0416677	0.0177688	0.0672428	0.0512212	0.0250359	0.0282559	0.0208822	0.0291242	0.0252988	0.0547598	0.0608267	0.0492599	0.0200022	0.0181798
652.66	DHCer24:0	C17Cer	0.00830533	0.013192	0.0159497	0.00917258	0.013425	0.00518219	0.0124817	0.0120141	0.0155021	0.0128093	0.012016	0.0145659	0.0102464	0.0106721	0.0144798	0.0140789	0.0132672	0.00969279	0.0169169	0.0118464	0.0113172	0.0122856	0.00803012	0.0155791	0.0132801	0.010502	0.0131275	0.00946088	0.0159549	0.0111065	0.0147735	0.0173834	0.0135624	0.0104433	0.0103724	0.0194907	0.00828046	0.013342	0.0103538	0.00910072	0.00743172	0.0141929	0.0110449	0.0271926	0.0109723	0.0125838	0.0119476
634.65	DHCer24:0(-H2O)	C17Cer	0.0155017	0.0200365	0.0435268	0.0209837	0.0240719	0.021719	0.0355942	0.0478645	0.0480524	0.0286238	0.014163	0.0271467	0.0442428	0.0173532	0.0243883	0.0409257	0.0389668	0.0129934	0.0495127	0.0196828	0.0251789	0.0501151	0.0303031	0.03552	0.0267208	0.0226721	0.0303314	0.0144622	0.0249823	0.0189843	0.0519689	0.0432761	0.0257646	0.0415231	0.0183401	0.0554623	0.0481428	0.0321938	0.031097	0.0172103	0.0213096	0.0192064	0.0422291	0.0486471	0.0535287	0.0237819	0.0235385
598.47	HexCer10:0(-H2O)	C8GC	0.000595102	0.000863895	0.000523046	0.000703972	0.000488431	0.000376052	0.000579465	0.000496606	0.000180478	0.000584813	0.000396591	0.000898728	0.000421987	0.000419655	0.000438751	0.000578877	0.000612813	0.000310807	0.0003677	0.000331591	0.000486965	0.000350345	0.000537356	0.000477811	0.000503952	0.00024206	0.00017875	0.000662597	0.000747867	0.000399846	0.00071947	0.000509539	0.000314667	0.000751388	0.000432396	0.000263652	0.000512431	0.000469639	0.000162642	0.000553961	0.000360012	0.000743798	0.0003507	0.000400492	0.000546937	0.00118717	0.000438394
596.45	HexCer10:1(-H2O)	C8GC	0.000561596	0.00111318	0.000495312	0.000862143	0.000390199	0.000226854	0.000367966	0.000439203	0.000279699	0.000470438	0.000325389	0.000559048	0.000247406	0.000483807	0.000627392	0.000498379	0.000275668	0.000411048	0.000399922	0.000429032	0.000326954	0.00025421	0.000402247	0.000278566	0.000615431	0.000362524	0.000561888	0.000642095	0.000689369	0.000544087	0.000430798	0.000348029	0.000461089	0.000750126	0.000294506	0.000328551	0.000484128	0.000334222	0.000396951	0.000671479	0.000475375	0.000464013	0.000223346	0.000453165	0.000531272	0.00122007	0.000550295
626.5	HexCer12:0(-H2O)	C8GC	0.00151815	0.00119518	0.000993658	0.00111566	0.00133159	0.00105325	0.00121396	0.00124775	0.00223844	0.00143242	0.00189032	0.000897762	0.00100459	0.00156375	0.00108729	0.0014105	0.00125539	0.000992627	0.000775451	0.000875153	0.000805832	0.000656816	0.000933729	0.00115336	0.00113149	0.00087775	0.00102266	0.00214016	0.000770167	0.00126406	0.00119855	0.00105346	0.00083742	0.00104362	0.000634975	0.000585828	0.000902713	0.00154049	0.000677075	0.00153291	0.00141618	0.000978818	0.00138237	0.00152357	0.00121137	0.00237393	0.0016453
624.48	HexCer12:1(-H2O)	C8GC	0.000826679	0.00162163	0.00106776	0.0012872	0.00131483	0.00104775	0.00119641	0.000858769	0.00185696	0.00131396	0.00130768	0.000932551	0.000933094	0.000955443	0.0014595	0.00188993	0.00111975	0.000837682	0.00101547	0.000582466	0.000684812	0.00107394	0.00121793	0.00148907	0.00132731	0.00108672	0.00101931	0.00108988	0.0010953	0.00148761	0.00164397	0.00147304	0.00175985	0.00190979	0.000768487	0.000919304	0.000990229	0.00133497	0.00152039	0.000974143	0.00215543	0.00108643	0.00151352	0.00100623	0.000912016	0.00184594	0.00132244
654.53	HexCer14:0(-H2O)	C8GC	0.00109146	0.000948454	0.00103049	0.00110363	0.00089812	0.000866144	0.000735932	0.000763225	0.000816002	0.000592983	0.000828401	0.000472557	0.000484172	0.000785807	0.00101454	0.00083221	0.000602567	0.000604195	0.000691733	0.000787893	0.000394251	0.000476805	0.000786313	0.000677055	0.000489338	0.000480161	0.000720751	0.00126741	0.000566233	0.000745449	0.0014726	0.000588731	0.00107926	0.00113108	0.000500246	0.000618133	0.000944795	0.00096857	0.000699655	0.00110755	0.00109794	0.00076532	0.00063012	0.000775556	0.00107719	0.00156651	0.00139471
652.52	HexCer14:1(-H2O)	C8GC	0.00302177	0.00518666	0.00420344	0.00423765	0.00445903	0.00184113	0.0032406	0.00343885	0.00458295	0.00375465	0.00231371	0.00439797	0.00267358	0.00306386	0.00401672	0.00513531	0.00350416	0.00327127	0.00358755	0.00337845	0.00313437	0.00311181	0.00407338	0.00296461	0.00388882	0.00321832	0.00369001	0.0036974	0.00264533	0.00357766	0.00489314	0.004606	0.00397039	0.00470805	0.00253309	0.00375342	0.00297702	0.00398185	0.0040762	0.00431084	0.00448988	0.0024535	0.00305651	0.0049391	0.00315119	0.00561945	0.00460941
682.56	HexCer16:0(-H2O)	C8GC	0.00796701	0.00504976	0.00893555	0.00869138	0.00762506	0.00724864	0.00634258	0.00564205	0.0120604	0.00878854	0.00550328	0.00736571	0.00610768	0.00840628	0.00817075	0.006415	0.00852425	0.00498392	0.00522519	0.00594755	0.00406873	0.00425769	0.00591651	0.0073337	0.00690919	0.00601049	0.00919772	0.00978286	0.00775984	0.00562497	0.00833307	0.00567648	0.00684883	0.00577395	0.00536385	0.0032955	0.00445286	0.00611923	0.00519473	0.00952709	0.0118612	0.00691715	0.0103685	0.00703147	0.00632383	0.0106581	0.00754897
680.55	HexCer16:1(-H2O)	C8GC	0.00108168	0.000337139	0.000801253	0.00115977	0.000996352	0.000615136	0.000658888	0.000548721	0.00046702	0.000601833	0.00107034	0.000958643	0.000449588	0.000454901	0.000697321	0.000575326	0.000335681	0.000528097	0.000462259	0.000404308	0.000648131	0.000444867	0.000723654	0.000601493	0.000778682	0.000728159	0.000768194	0.000655608	0.000414979	0.00123776	0.00120195	0.00112467	0.000872186	0.000972137	0.000616249	0.000302185	0.000653201	0.00104684	0.000859679	0.000871777	0.001267	0.00109418	0.000601607	0.000544282	0.000340899	0.00207947	0.000717448
710.59	HexCer18:0(-H2O)	C8GC	0.00168034	0.000905991	0.00161291	0.00186597	0.00141813	0.000985686	0.00140285	0.00148151	0.00167135	0.00157334	0.00093176	0.00115772	0.00107076	0.00154245	0.00160274	0.00128442	0.00135492	0.000942813	0.000842306	0.00102641	0.00114058	0.000632299	0.0013936	0.00151388	0.00142042	0.00123094	0.00163463	0.00174922	0.00155779	0.00159035	0.00122439	0.00127506	0.00174006	0.00124502	0.000752437	0.000531215	0.00133768	0.00118898	0.00102036	0.00161569	0.00216737	0.00250085	0.00195309	0.00120178	0.000939601	0.00219198	0.00207058
708.58	HexCer18:1(-H2O)	C8GC	0.000470566	0.000227688	0.000283407	0.000244163	0.000487262	0.00051027	0.000431029	0.000264353	0.000298516	0.000414271	0.000500716	0.0010978	0.000356811	0.000539339	0.000772044	0.000379999	0.000511816	0.000197425	0.000174063	0.000173794	0.000331575	0.000200658	0.000363086	0.00061841	0.000671379	0.000535303	0.000801739	0.000985974	0.000383629	0.000454502	0.000379456	0.000746074	0.000499407	0.000730784	0.000382785	0.000189482	0.000348572	0.000600734	0.000255908	0.0006955	0.000700797	0.000756711	0.000210515	0.00052733	0.000441705	0.00109294	0.000473834
738.62	HexCer20:0(-H2O)	C8GC	0.00100903	0.00110476	0.00135897	0.00141507	0.000973354	0.000841379	0.00139095	0.000690339	0.00117952	0.00163768	0.000571919	0.00110167	0.000952381	0.00172756	0.00143214	0.00116545	0.000688927	0.000638118	0.00103112	0.000833704	0.000815652	0.000601651	0.00100254	0.000720288	0.00100206	0.00100472	0.000949819	0.00140115	0.00123847	0.00075038	0.0013621	0.000900637	0.00130232	0.000791753	0.000552776	0.000704472	0.000897499	0.00101851	0.000551739	0.00093571	0.00186305	0.00135502	0.00245157	0.00116909	0.000773749	0.0020681	0.00136346
736.61	HexCer20:1(-H2O)	C8GC	0.000774196	0.000686723	0.000712851	0.000602832	0.000559766	0.000294727	0.000307878	0.000413523	0.000180478	0.000522179	0.000561966	0.000476423	0.000427641	0.000407737	0.000587633	0.000406043	0.000578659	0.000239905	0.000381853	0.000294505	0.000360747	0.000334215	0.000552741	0.000512773	0.000567415	0.000432654	0.000865955	0.000834537	0.000519047	0.000554772	0.000554563	0.000221252	0.00030274	0.000407019	0.000446258	0.000395333	0.000285263	0.00037888	0.00030794	0.000619002	0.000745882	0.000646519	0.000698549	0.00082944	0.000533996	0.000929265	0.000733075
766.66	HexCer22:0(-H2O)	C8GC	0.00738347	0.00611498	0.0068763	0.00660486	0.00849667	0.00437383	0.00758837	0.00477572	0.0116866	0.00773056	0.00398123	0.00688348	0.00497539	0.00703093	0.0072659	0.00571538	0.00528453	0.00456645	0.0068312	0.00857738	0.00345959	0.00223853	0.00418304	0.00867127	0.0050416	0.00638602	0.00927104	0.00668794	0.00798414	0.00418174	0.00921506	0.00712486	0.00808872	0.00568818	0.00426997	0.00293624	0.00438918	0.00328555	0.00429971	0.008193	0.0133954	0.0063395	0.00994933	0.00620263	0.00524392	0.0136149	0.00902265
764.64	HexCer22:1(-H2O)	C8GC	0.000527793	0.000466357	0.000391743	0.000821152	0.0004093	0.000686066	0.000453636	0.000568359	0.000325887	0.000383975	0.000293233	0.000660034	0.000479516	0.000529449	0.000645156	0.000275825	0.000413746	0.00029736	0.000366796	0.000486479	0.000174164	0.000282921	0.000466025	0.000400369	0.000295607	0.000252523	0.000876977	0.000590373	0.000351956	0.00038382	0.00047602	0.000551219	0.000518947	0.000681168	0.000333903	0.000409095	0.000327718	0.000738553	0.00039597	0.000379532	0.000359349	0.000402891	0.000721359	0.000441359	0.000222725	0.00103527	0.000591874
794.69	HexCer24:0(-H2O)	C8GC	0.00989316	0.00986121	0.0113935	0.0116031	0.0106656	0.00776747	0.0111318	0.0066345	0.0171052	0.0132318	0.00732546	0.0128837	0.0100426	0.011671	0.0101276	0.00925316	0.00845106	0.00718708	0.0116785	0.0105956	0.00664854	0.00334505	0.00582895	0.0131689	0.00734341	0.0099615	0.0113724	0.0112343	0.0128504	0.00620152	0.0148032	0.010146	0.00935754	0.00899605	0.00472814	0.00346036	0.00767604	0.0047665	0.00582664	0.0130896	0.0186139	0.00725634	0.0140537	0.00846755	0.0100696	0.0184318	0.0158514
792.67	HexCer24:1(-H2O)	C8GC	0.0111492	0.00774613	0.00987764	0.0107249	0.00807763	0.00708232	0.00849237	0.00795325	0.013606	0.00887228	0.00868903	0.0103122	0.00658719	0.0092144	0.00620258	0.00674232	0.00672582	0.00535157	0.00400826	0.00640276	0.00647207	0.00370411	0.0049369	0.00758858	0.00568501	0.00772951	0.0100584	0.0109967	0.00936094	0.00462227	0.0101368	0.00531838	0.00663415	0.00674735	0.00572669	0.00213312	0.00472174	0.00456673	0.00498594	0.0126203	0.0122272	0.0056706	0.011518	0.0078821	0.00715173	0.0145994	0.011521
659.48	SM12:2-OH	C12SM	0.000621195	0.000743462	0.000721301	0.00108982	0.000922678	0.000724436	0.000652344	0.000700158	0.000901048	0.000719224	0.00107001	0.000911981	0.00049296	0.000594653	0.0010394	0.000658488	0.00101095	0.000900791	0.000747746	0.000756624	0.000619682	0.000361313	0.000982961	0.000642362	0.000923862	0.000703274	0.000629082	0.000872879	0.000686183	0.00106446	0.000612171	0.000713424	0.000723861	0.000667503	0.000530645	0.000521509	0.000485246	0.000893178	0.000882096	0.00129397	0.000747444	0.000779402	0.000540103	0.000425791	0.000480042	0.00119494	0.000794826
643.48	SM12:2-OH	C12SM	0.000239286	0.000307854	0.000318508	0.000360897	0.000374022	0.000268893	0.000211796	0.000234519	0.00109937	0.000417821	0.000643778	0.000433626	0.000616521	0.000409476	0.000420664	0.000279968	0.000349586	0.000190549	0.000340596	0.000369041	0.000259946	0.000165817	0.000181823	0.000415674	0.000435895	0.000293283	0.000370507	0.000349471	0.000336443	0.000393095	0.000349146	0.000339345	0.000331542	0.000260274	0.000244043	0.000299071	0.000278746	0.000312612	0.000422313	0.000426993	0.000397377	0.00037854	0.000453344	0.000452257	0.000418011	0.000500606	0.000444533
675.54	SM14:0	C12SM	0.213301	0.242961	0.245836	0.292624	0.275698	0.285151	0.237342	0.390345	0.277708	0.19779	0.174777	0.26762	0.0970902	0.269843	0.239567	0.204521	0.36883	0.231993	0.224352	0.274424	0.199215	0.150988	0.256793	0.186715	0.247648	0.214486	0.202141	0.209966	0.219259	0.253685	0.289324	0.227831	0.271779	0.23116	0.17782	0.24438	0.238452	0.287101	0.269607	0.261705	0.255895	0.221597	0.150253	0.142955	0.181176	0.283852	0.21353
673.53	SM14:1	C12SM	0.0172249	0.0204725	0.0198753	0.0341705	0.0295863	0.0245013	0.0171436	0.0248845	0.0221886	0.0189685	0.0215042	0.0198246	0.0100986	0.020444	0.0255728	0.0234487	0.0476213	0.0383508	0.0193152	0.0293351	0.028325	0.0157039	0.0342431	0.015056	0.0302412	0.0276593	0.0139447	0.0354713	0.0212336	0.0325424	0.0224545	0.0201238	0.0186264	0.0216858	0.0205815	0.0174831	0.013623	0.02425	0.0189421	0.0304784	0.0297581	0.02026	0.0149856	0.00891981	0.0149006	0.0230933	0.0223812
703.58	SM16:0	C12SM	2.25497	1.99519	2.17973	2.41165	2.27644	1.64525	1.78227	1.71958	2.07233	2.0817	1.67376	1.9265	1.11782	2.32779	2.18641	1.77403	2.34381	1.56007	1.74279	1.90362	1.33013	1.4338	1.91252	1.39139	1.81474	1.75464	1.69053	1.69888	1.65582	1.72984	1.93366	2.0221	1.81944	1.85976	1.7795	1.8382	1.61268	2.16835	1.82366	1.8017	2.21149	1.26628	1.75291	1.56733	1.2787	2.44655	1.62198
701.56	SM16:1	C12SM	0.387695	0.365459	0.358396	0.417426	0.432313	0.276482	0.303699	0.385593	0.377276	0.383412	0.309977	0.3793	0.210912	0.390369	0.389697	0.375265	0.507109	0.46534	0.366499	0.382064	0.297146	0.296737	0.486224	0.270589	0.427488	0.389424	0.290745	0.463751	0.326208	0.394876	0.353405	0.386244	0.329372	0.356303	0.367682	0.293844	0.225203	0.537422	0.280109	0.355214	0.424434	0.273629	0.344214	0.231246	0.272142	0.413429	0.271791
543.257	LysoPI14:0	PI31:1	0.00258678	0.00937143	0.00733391	0.00883285	0.011099	0.00299283	0.00316861	0.00165938	0.00208705	0.00852455	0.00202698	0.00219649	0.00139277	0.00236917	0.00215099	0.00595184	0.00591979	0.0066029	0.00628522	0.0125432	0.00308007	0.0039438	0.00279363	0.00490405	0.00458981	0.00344532	0.000471435	0.006386	0.00865751	0.00906829	0.00187093	0.00742409	0.00124179	0.00905597	0.00137136	0.000649351	0.0158146	0.00589354	0.00512371	0.00506211	0.00898843	0.00935344	0.00308595	0.0021518	0.0193043	0.0175478	0.00412326
541.241	LysoPI14:1	PI31:1	0.00425645	0.00787755	0.00447211	0.0104916	0.0125029	0.00295706	0.00263198	0.00218374	0.00695504	0.00818458	0.00247902	0.00505072	0.00162471	0.00380774	0.00360362	0.00613651	0.00663824	0.0114779	0.00807614	0.0162598	0.00123835	0.00473934	0.00585888	0.00655188	0.00473699	0.00372068	0.00116271	0.0100653	0.00526049	0.00878337	0.00744291	0.0126546	0.00814214	0.0091716	0.00342682	0.00182716	0.0246455	0.00980143	0.00632831	0.00694745	0.00443717	0.00946374	0.00434544	0.00285271	0.0102701	0.0109775	0.00275577
539.226	LysoPI14:2	PI31:1	0.00246388	0.00858843	0.0510999	0.00426549	0.00527704	0.00285051	0.0146434	0.00139559	0.00363166	0.00643689	0.00166969	0.00518319	0.00197872	0.00257593	0.00174753	0.00678701	0.00134492	0.00917325	0.00544051	0.00529655	0.00260278	0.00661897	0.0055165	0.00406728	0.00777256	0.00151464	0.00212915	0.00431286	0.00336039	0.00865906	0.00683542	0.0106831	0.00231851	0.0144965	0.00371184	0.000363608	0.0118213	0.0109943	0.00493882	0.00704539	0.00715687	0.0046803	0.00543346	0.00251405	0.00454617	0.0539616	0.00180094
571.288	LysoPI16:0	PI31:1	0.00141422	0.00180722	0.000489679	0.00264012	0.00148673	0.000913685	0.00216585	0.00164767	0.000763398	0.00213277	0.00202985	0.000888863	0.00246381	0.00134338	0.000556898	0.003792	0.00643771	0.00183581	0.00465361	0.0019501	0.00366711	0.00330666	0.0012943	0.00128412	0.00173951	0.000786011	0.00138405	0.00143303	0.00733619	0.00596191	0.00242685	0.00678309	0.000877007	0.00581432	0.00238863	0.00198072	0.00825513	0.00147422	0.00282284	0.00114608	0.00290093	0.000851372	0.00163925	0.00124441	0.00589394	0.00254417	0.00255125
569.273	LysoPI16:1	PI31:1	0.0040652	0.00513066	0.0117566	0.00975492	0.0315139	0.0153078	0.00679904	0.00275928	0.00672481	0.0131755	0.00686092	0.00409763	0.00697077	0.0022969	0.00476324	0.00854021	0.00813953	0.0114009	0.0113755	0.0217832	0.0105976	0.00944883	0.00741976	0.00490373	0.00725814	0.00272117	0.00182095	0.00912702	0.0104324	0.0131121	0.00568645	0.0195134	0.00731791	0.0209266	0.00695189	0.00166955	0.0196184	0.01539	0.00993622	0.00538624	0.00934244	0.0158547	0.002952	0.0039382	0.0144221	0.0248434	0.0104451
567.257	LysoPI16:2	PI31:1	0.00194364	0.00141408	0.000746652	0.00312733	0.00196971	0.00271171	0.000486506	0.00311219	0.00205854	0.00164727	0.00103008	0.000539358	0.00100952	0.000468995	0.000207133	0.00263069	0.00228683	0.00513581	0.00124765	0.00357988	0.0024858	0.00325811	0.000484487	0.000413213	0.00119377	0.000883099	0.000681694	0.00167766	0.000974155	0.00281119	0.000758373	0.00714379	0.00144899	0.0016861	0.000716444	0.000368823	0.0122511	0.00185046	0.00131783	0.00114531	0.00078359	0.00331384	0.00107634	0.000497084	0.00118373	0.011835	0.00100704
599.32	LysoPI18:0	PI31:1	0.00381123	0.00416683	0.0500105	0.00350895	0.00475548	0.00717603	0.0105395	0.00706313	0.00613926	0.00426866	0.00265479	0.00965287	0.00875815	0.00909632	0.0067105	0.0225839	0.0114112	0.0204905	0.00963307	0.00486679	0.0110553	0.00679979	0.00627512	0.0051412	0.00551758	0.00468414	0.00469279	0.00636814	0.00882207	0.00490237	0.0147065	0.0102413	0.00554233	0.00719368	0.00824081	0.00834668	0.0101	0.0154861	0.0110803	0.0144522	0.00672136	0.013175	0.00424287	0.0053679	0.0146744	0.0311652	0.00690124
597.304	LysoPI18:1	PI31:1	0.00349633	0.00727227	0.00491629	0.00338241	0.00995124	0.000798271	0.00559847	0.00591036	0.0067462	0.00658879	0.00214119	0.00448357	0.0132125	0.00304905	0.00357214	0.0191195	0.00982037	0.00887207	0.00545617	0.00754006	0.0140525	0.0108178	0.00486361	0.00724924	0.00496697	0.00345769	0.00703648	0.00452701	0.0146465	0.00293036	0.0105836	0.0295991	0.0113062	0.00908813	0.00822257	0.0147071	0.0145682	0.0113395	0.0170375	0.00731839	0.00767775	0.0170477	0.00378648	0.00756132	0.0225475	0.0246423	0.00647766
595.288	LysoPI18:2	PI31:1	0.00226566	0.0050472	0.00991274	0.00415433	0.00859958	0.00153876	0.00435714	0.00392564	0.00295808	0.00318689	0.00310013	0.0063062	0.006319	0.00477732	0.00253236	0.01045	0.0127995	0.00902793	0.00705631	0.00873354	0.00892567	0.00702384	0.00416206	0.00349132	0.00410339	0.0100636	0.00451428	0.00387175	0.00917246	0.0085642	0.0128795	0.0267769	0.00790601	0.0109462	0.00595772	0.00808462	0.0100699	0.016526	0.0079976	0.00477833	0.0066244	0.011167	0.00522734	0.00752462	0.00917238	0.0255861	0.00429429
627.351	LysoPI20:0	PI31:1	0.00408402	0.00407861	0.00369122	0.0143323	0.0208667	0.0034337	0.0035513	0.0027421	0.00255998	0.00233574	0.00192841	0.00208395	0.00390424	0.00054834	0.00164438	0.00297607	0.00325069	0.0121716	0.00705676	0.00913148	0.00475686	0.00266549	0.00144955	0.00103382	0.00444124	0.00227909	0.000911321	0.00600818	0.00359497	0.00698858	0.00157242	0.0142138	0.0113179	0.0226882	0.0083556	0.00122888	0.00840596	0.0148508	0.00701553	0.00783669	0.00373728	0.00636314	0.00181072	0.000934885	0.0124261	0.00914542	0.00427906
625.335	LysoPI20:1	PI31:1	0.00161778	0.00092283	0.00188505	0.00117982	0.00214551	0.000251313	0.000673315	0.000314202	0.000581102	0.000700664	0.000443103	0.00125971	0.000582214	0.000458112	0.00102991	0.00275588	0.000612569	0.000643924	0.00101893	0.00225224	0.00118766	0.001573	0.000262664	0.00133769	0.000667691	0.00025568	0.000150156	0.00181104	0.00119931	0.000754592	0.000587091	0.00408447	0.000476315	0.00200062	0.00077627	0.000414165	0.00720048	0.00178275	0.000298613	0.000850589	0.00203543	0.00347023	0.000446691	0.000504147	0.0078916	0.00290615	0.00126202
623.32	LysoPI20:2	PI31:1	0.000407854	0.000823628	0.000796703	0.000750978	0.00296158	0.000300231	0.000584819	0.00107082	0.000502873	0.00122049	0.000187418	0.00024562	0.000232498	0.000253779	0.000473011	0.00158836	0.00219168	0.00049173	0.00113457	0.0036246	0.000741567	0.00108426	0.000554419	0.000674486	0.000514772	0.000516663	0.000372296	0.000629824	0.000939546	0.00120885	0.000478428	0.0084786	0.000863939	0.00204203	0.000510217	0.000557	0.00412701	0.00214267	0.00197036	0.000945441	0.000506094	0.000653908	0.000248888	0.000275471	0.0021668	0.000962738	0.000938087
655.382	LysoPI22:0	PI31:1	0.00626873	0.00279869	0.0025446	0.0202769	0.0148901	0.00703371	0.00641858	0.00276117	0.00326618	0.0146676	0.00616388	0.0108922	0.0157212	0.00364525	0.029423	0.00888292	0.00208849	0.00798396	0.00671119	0.0097983	0.0069456	0.00677269	0.0221116	0.0115056	0.0281817	0.00959449	0.00377328	0.0187344	0.00834159	0.0318237	0.0129905	0.0755356	0.0548744	0.089815	0.0260928	0.00494137	0.104721	0.0428975	0.044469	0.0160927	0.0244162	0.00924439	0.00359333	0.00184719	0.0105715	0.0283851	0.00626488
653.367	LysoPI22:1	PI31:1	0.00257448	0.00160406	0.00320068	0.00185884	0.00419552	0.00114054	0.000591512	0.0012164	0.000493607	0.00419051	0.00227964	0.000879199	0.0029701	0.000465719	0.000725377	0.00299974	0.000880187	0.00272804	0.0023375	0.00874899	0.00265968	0.00662462	0.00132311	0.000763144	0.00123431	0.00103109	0.000742994	0.00168639	0.00186967	0.003186	0.000852444	0.00880353	0.00139304	0.000834431	0.00127311	0.000999341	0.00580209	0.00544359	0.00128428	0.00236237	0.00320301	0.00229478	0.00114138	0.000793492	0.00113434	0.00661648	0.000711239
651.351	LysoPI22:2	PI31:1	0.00210287	0.000805692	0.00237343	0.00395004	0.0148264	0.00429739	0.00107742	0.00105817	0.00247552	0.00229219	0.00203081	0.00265974	0.00156015	0.00171444	0.00254951	0.00146051	0.00408623	0.0046618	0.00492103	0.00583393	0.00394727	0.00263452	0.00122982	0.000475868	0.00277741	0.000618699	0.000836842	0.00202596	0.00595347	0.00336989	0.00257221	0.0119341	0.00360421	0.00379709	0.00204938	0.00167969	0.00810468	0.00788398	0.00327444	0.00291994	0.00115943	0.00582563	0.00142541	0.000905119	0.0126185	0.011185	0.00210209
767.507	PI(O-)30:0	PI31:1	0.000904069	0.00212386	0.00323925	0.000794642	0.00106418	0.0006292	0.00194707	0.00235312	0.00045868	0.00067173	0.00148371	0.00158747	0.00211354	0.000963558	0.000356462	0.00152828	0.00128442	0.00250907	0.000946804	0.000788983	0.000802077	0.00247113	0.00124143	0.00113657	0.000815912	0.0010649	0.000685687	0.0014373	0.00223326	0.00281598	0.00104384	0.00794752	0.00124852	0.0033598	0.000438962	0.000348542	0.00247501	0.00365891	0.00192062	0.00148129	0.00140088	0.00234356	0.00114455	0.000754518	0.00225251	0.00578049	0.000667637
763.476	PI(O-)30:2	PI31:1	0.00138709	0.000687455	0.000493145	0.00414052	0.00150895	0.00264093	0.000474459	0.000722439	0.000460818	0.00080392	0.000542634	0.000659953	0.000319234	0.000513158	0.000497449	0.000849967	0.00264788	0.000944035	0.000625481	0.00195719	0.00038703	0.00111104	0.00076799	0.000696729	0.000831569	0.000295741	0.000452566	0.000522653	0.00271401	0.00150405	0.000337464	0.00554918	0.00110362	0.00148974	0.00194931	0.000648265	0.0029219	0.0011376	0.000511815	0.000754197	0.000808315	0.000789138	0.000888828	0.000682371	0.00370613	0.00141745	0.000765189
761.46	PI(O-)30:3	PI31:1	0.00046345	0.000757372	0.000315908	0.000400551	0.00071491	0.00101932	0.000361124	0.000483577	0.000460462	0.000639391	0.000328898	0.000290718	0.000504345	0.000369786	0.000594025	0.00188845	0.000420577	0.000873439	0.000902987	0.000551561	0.000457793	0.000831182	0.000529104	0.00039191	0.000325321	0.000555192	0.000569176	0.000931146	0.000471861	0.000985404	0.000615992	0.00232141	0.000923954	0.000953425	0.000523593	0.00014892	0.000800301	0.000880693	0.000186858	0.00115362	0.000508995	0.000623419	0.000253739	0.000115158	0.000315868	0.00229761	0.000527412
757.429	PI(O-)30:5	PI31:1	0.000719637	0.00316786	0.000788686	0.000978432	0.00117995	0.000434142	0.000640594	0.00321869	0.000500378	0.000816117	0.000466072	0.000728002	0.00140385	0.000615853	0.000472776	0.00182275	0.00116903	0.00149398	0.00101727	0.00169977	0.000943603	0.000528098	0.00119304	0.000372174	0.000761808	0.000312826	0.000672509	0.00106996	0.00192272	0.0012818	0.000471203	0.00437103	0.00161673	0.00422934	0.000462187	0.00148195	0.00140509	0.000338303	0.000513124	0.000945441	0.00243005	0.00157254	0.0011396	0.000859837	0.000177942	0.000964262	0.000653684
755.414	PI(O-)30:6	PI31:1	0.000865225	0.00229188	0.00112799	0.0035711	0.0031329	0.00662204	0.00374421	0.00787451	0.000863723	0.0011534	0.000738505	0.00110529	0.00118743	0.0017904	0.00432783	0.00506429	0.00285573	0.00113076	0.00426167	0.00437522	0.000443785	0.00234321	0.00404275	0.00200388	0.00168941	0.00238714	0.00142119	0.00305166	0.00494161	0.00473987	0.00343145	0.00395544	0.00322039	0.00367474	0.000797914	0.00285628	0.00266792	0.00131168	0.00238793	0.00289514	0.0053535	0.00323421	0.00504785	0.00197358	0.000278407	0.0019842	0.00756283
791.507	PI(O-)32:2	PI31:1	0.00104877	0.000588071	0.000824654	0.00205778	0.00109108	0.000595264	0.00106909	0.00187955	0.00060694	0.00104461	0.000875998	0.000453995	0.000773976	0.000514637	0.00106445	0.00127969	0.00152423	0.000975513	0.00136223	0.00145144	0.00161123	0.00189044	0.00184858	0.00102849	0.0011388	0.00165049	0.000522552	0.0014074	0.000774584	0.00119379	0.000883328	0.00873076	0.00135091	0.00160684	0.000690666	0.00136295	0.00122075	0.00108502	0.00235226	0.00127819	0.000479989	0.00249134	0.000306407	0.000823133	0.00101089	0.00116869	0.00157433
787.476	PI(O-)32:4	PI31:1	0.000304667	0.000650483	0.00104436	0.000813578	0.00816689	0.00122385	0.000340004	0.000352345	0.000351762	0.00134942	0.000487764	0.000447552	0.000253974	0.000414372	0.00200977	0.00214475	0.014546	0.000441915	0.000741271	0.00196082	0.00024406	0.00153945	0.000555818	0.0002973	0.000494766	0.000428648	0.000133583	0.000653899	0.000674798	0.00327897	0.000187433	0.00095048	0.00169527	0.000314094	0.000639839	0.000462332	0.00204786	0.00123484	0.000667258	0.00142217	0.00127629	0.00288896	0.000351947	0.000217703	0.00784335	0.00513049	0.0007817
785.46	PI(O-)32:5	PI31:1	0.000395252	0.000854743	0.00138627	0.000415923	0.00058296	0.000193224	0.000694881	0.000366129	0.000449057	0.00129396	0.00029285	0.000305616	0.000575563	0.000556581	0.000658291	0.00197102	0.000510352	0.00163029	0.00034677	0.00063664	0.000329553	0.000653913	0.000369939	0.000475242	0.000300617	0.000234001	0.000245002	0.000457807	0.00100338	0.000801508	0.000347664	0.00190304	0.000135256	0.000339953	0.000225439	8.57592e-05	0.00042864	0.000403371	0.00040955	0.000352462	0.00217203	0.0011638	0.000254234	0.000141519	0.00144255	0.00217864	0.000428813
819.539	PI(O-)34:2	PI31:1	0.00137226	0.00123398	0.00229412	0.00128007	0.0217679	0.000899774	0.00240442	0.000799479	0.00151806	0.00138175	0.000742652	0.00120072	0.000858496	0.000588911	0.000602954	0.00078545	0.00680461	0.000539711	0.00157499	0.00172486	0.00170438	0.00193512	0.000759878	0.000621073	0.00156102	0.000739117	0.000878774	0.00217565	0.00136387	0.00379882	0.0010777	0.00378664	0.000888554	0.00252747	0.000725929	0.00262145	0.00334756	0.00078033	0.00187055	0.00104307	0.00294499	0.00516814	0.00125691	0.00108561	0.00167612	0.00107731	0.00238254
813.492	PI(O-)34:5	PI31:1	0.000702736	0.000857672	0.000696817	0.00135002	0.000759933	0.000412741	0.000364099	0.000383878	0.000527108	0.000900651	0.000216926	0.00119609	0.000281824	0.000417119	0.000374085	0.000493644	0.00127417	0.000249074	0.000252963	0.000342135	0.000821573	0.000693915	0.000375673	0.000789303	0.000164226	0.000295977	0.000130987	0.000625941	0.000206574	0.000845513	0.000379399	0.0011014	0.000130561	0.000646269	0.000438232	0.000165289	0.000304256	0.000334702	0.000204857	0.00029903	0.000407472	0.000323547	0.000193447	0.000386719	0.000177942	0.000588575	0.000543458
811.476	PI(O-)34:6	PI31:1	0.000368269	0.000514676	0.00117046	0.000581223	0.000911374	0.000509047	0.00040039	0.000841398	0.00134004	0.00199108	0.00063387	0.000299979	0.000397657	0.000731015	0.00045762	0.00167655	0.000674289	0.000757001	0.000489363	0.000752625	0.000980284	0.00053455	0.00059414	0.000577057	0.00042657	0.00043124	0.000249994	0.000574297	0.000811078	0.000537307	0.000971449	0.00271303	0.000656106	0.00107852	0.00111674	0.000790521	0.00218007	0.00070854	0.000692129	0.000659037	0.000665078	0.000321753	0.00061123	0.000730048	0.000775906	0.000945985	0.000731587
849.586	PI(O-)36:1	PI31:1	0.00594702	0.00304669	0.00299701	0.00706891	0.00746485	0.00466687	0.00211915	0.00434351	0.00403189	0.00441248	0.0056388	0.00387234	0.00421821	0.00559349	0.00515471	0.00841355	0.00232757	0.00294824	0.00254725	0.00962578	0.00552168	0.00338989	0.00842146	0.0048901	0.00336959	0.00464266	0.00399971	0.00268704	0.00781694	0.0112891	0.00635515	0.00793155	0.00453641	0.0104648	0.00207905	0.00926316	0.00559057	0.0022315	0.00589766	0.00805827	0.00749956	0.0136286	0.00545949	0.00366424	0.0135327	0.0031451	0.0117641
847.57	PI(O-)36:2	PI31:1	0.00291265	0.00345448	0.00270277	0.0113446	0.00360574	0.00260638	0.00292573	0.00398153	0.00270361	0.00389365	0.00501466	0.00294623	0.00462917	0.00349533	0.00363629	0.00214208	0.012305	0.00281392	0.00334754	0.00192992	0.00560082	0.00261823	0.00541817	0.00408937	0.00848844	0.00809564	0.00281913	0.00390029	0.00133371	0.00953711	0.00372542	0.00652832	0.00664189	0.00604264	0.00283209	0.00762077	0.00363134	0.00196619	0.00350875	0.0050849	0.00748202	0.0125859	0.0053101	0.0046796	0.00323048	0.00161004	0.00641522
845.554	PI(O-)36:3	PI31:1	0.00194572	0.00084669	0.00141573	0.00248596	0.00203344	0.000847494	0.00112279	0.000528139	0.000582349	0.000806473	0.000466072	0.00134608	0.00118868	0.000333336	0.000658409	0.000780419	0.00277449	0.00138748	0.000803006	0.00249202	0.00171319	0.001954	0.00145108	0.000200811	0.0014676	0.000633899	0.000788521	0.00108918	0.00205092	0.00214923	0.000839268	0.00432414	0.000845541	0.00179732	0.000946018	0.00214949	0.00291147	0.00227616	0.00284771	0.000958068	0.000950861	0.00145686	0.00092437	0.00153325	0.000552556	0.0031473	0.00132516
843.539	PI(O-)36:4	PI31:1	0.0013567	0.000778786	0.000363142	0.000879965	0.00516731	0.000582423	0.00164425	0.000660316	0.000455829	0.000628612	0.000592399	0.00104469	0.00095881	0.00143012	0.00141715	0.00231758	0.00236367	0.00138839	0.00113186	0.00274399	0.00097624	0.00148606	0.00114968	0.00120361	0.00115793	0.000639201	0.00138915	0.00178017	0.00193255	0.00118985	0.000782883	0.00234746	0.000764463	0.00102217	0.000596429	0.00124691	0.00109785	0.00103124	0.0022639	0.00133825	0.00109506	0.00217228	0.00108723	0.000496957	0.00168832	0.000924831	0.000337772
841.523	PI(O-)36:5	PI31:1	0.000325868	0.000844677	0.00131823	0.000433968	0.000781762	0.000551544	0.000169258	0.00168128	0.000626542	0.000793849	0.000406895	0.000711896	0.000542033	0.000871851	0.00177314	0.00148182	0.000527673	0.000799634	0.000994535	0.000782439	0.000741423	0.000359217	0.000759739	0.000286022	0.000688045	0.000635666	0.000464047	0.000593712	0.000523302	0.000702026	0.00040405	0.000906368	0.000944001	0.000907594	0.000639839	0.000739601	0.00183373	0.000547432	0.00107648	0.00125556	0.00033979	0.00110479	0.000646772	0.00116508	0.0002032	0.00085714	0.0019285
877.617	PI(O-)38:1	PI31:1	0.00718496	0.00590194	0.00900489	0.0210907	0.0274539	0.0107684	0.00729492	0.0125981	0.00480812	0.00287754	0.00660667	0.00627902	0.00395856	0.00159801	0.00893998	0.040899	0.023109	0.0386371	0.00902174	0.0178556	0.00745149	0.00529324	0.00563552	0.00418351	0.00361472	0.00618911	0.00149188	0.0116817	0.00222195	0.0154381	0.0117595	0.0265747	0.0168125	0.0560616	0.00875492	0.00348006	0.0179567	0.0207369	0.00660206	0.00350506	0.00722953	0.0151468	0.00324633	0.000838269	0.00127	0.00559874	0.00449707
875.601	PI(O-)38:2	PI31:1	0.0139638	0.0162462	0.00940617	0.0218216	0.0114349	0.0163034	0.0063924	0.00837262	0.0153635	0.0105738	0.00572684	0.014645	0.00817705	0.00553581	0.00645955	0.0303502	0.0196203	0.0107471	0.0152284	0.0192525	0.0113957	0.0113973	0.0113582	0.00761061	0.012644	0.0113536	0.00685608	0.0176693	0.0119899	0.019136	0.0121548	0.018441	0.00597119	0.0183316	0.00557372	0.00354959	0.00374268	0.0202783	0.0109742	0.012797	0.0081721	0.020285	0.00971682	0.00870193	0.0160792	0.019918	0.0129199
873.586	PI(O-)38:3	PI31:1	0.0023128	0.0033454	0.00205492	0.0022917	0.00290486	0.00880406	0.00286282	0.00139899	0.00174028	0.00316519	0.00159058	0.00221602	0.00273926	0.00122336	0.00361044	0.0048003	0.00432677	0.00311724	0.00288573	0.000263782	0.00419726	0.000787147	0.00593385	0.00262777	0.00346354	0.00336202	0.0052382	0.00110491	0.00140158	0.00403802	0.00264545	0.00428437	0.00169958	0.00290316	0.000290493	0.00503539	0.00293196	0.000344546	0.00646805	0.000985938	0.00353009	0.00350772	0.00343216	0.00363309	0.00880997	0.00209014	0.00496577
871.57	PI(O-)38:4	PI31:1	0.00666324	0.00789567	0.00386153	0.0120876	0.00866897	0.0098327	0.0151967	0.0169209	0.0068524	0.00250565	0.0046655	0.00915217	0.00871354	0.00809991	0.0191094	0.00716257	0.0106108	0.00507652	0.00769429	0.00938345	0.00536456	0.00249919	0.0126418	0.0148785	0.0157393	0.00817235	0.0105887	0.00854204	0.00640324	0.0195773	0.0103369	0.0103183	0.00942732	0.00585742	0.0105367	0.016318	0.00232233	0.00453816	0.0108681	0.0134197	0.0100585	0.0208126	0.0124428	0.0168254	0.00491086	0.00131016	0.00915855
869.554	PI(O-)38:5	PI31:1	0.00190658	0.00150852	0.00221005	0.00446064	0.00549553	0.00307981	0.00414014	0.00209254	0.000933042	0.00170032	0.00267872	0.00439257	0.00225847	0.00297932	0.0039138	0.00858786	0.00189064	0.00497827	0.00454881	0.0040489	0.00379001	0.00130863	0.00305364	0.0013084	0.002065	0.00260818	0.00219574	0.00662092	0.00227473	0.00192715	0.00159665	0.00621051	0.00375025	0.00404307	0.00344409	0.00407088	0.00194582	0.00567048	0.00397197	0.00190336	0.00202327	0.00366142	0.00188596	0.00322745	0.00487425	0.00121878	0.00207
901.617	PI(O-)40:3	PI31:1	0.000377016	0.00215791	0.00195113	0.00101096	0.0025934	0.000778857	0.000536183	0.00159254	0.000360315	0.000716266	0.00101764	0.00104811	0.00095881	0.00072383	0.00277086	0.00280471	0.00109096	0.000663789	0.0013002	0.00109076	0.000486098	0.00155849	0.00265671	0.000671667	0.000410217	0.00198099	0.000637066	0.00196636	0.000719372	0.000814864	0.000433518	0.00180162	0.00102432	0.00202921	0.00237295	0.00151071	0.000262919	0.00231146	0.00262436	0.00065719	0.0015995	0.000715425	0.00125008	0.000694353	0.00151634	0.00102417	0.000496135
899.601	PI(O-)40:4	PI31:1	0.00114469	0.00193534	0.000593681	0.00122304	0.00179644	0.000812334	0.00236411	0.0011962	0.00177128	0.00107199	0.0028379	0.00313005	0.00149669	0.00285792	0.00246774	0.00233297	0.000792851	0.00102731	0.00197477	0.000511567	0.00159621	0.00101071	0.00151878	0.00139534	0.003959	0.00176243	0.00164353	0.00100007	0.00283116	0.00363136	0.00183523	0.00283199	0.00218719	0.00123031	0.00141878	0.00430926	0.00168067	0.00112272	0.00126072	0.00150532	0.00255368	0.00241135	0.00250957	0.00228638	0.000565044	0.00226207	0.00146875
897.586	PI(O-)40:5	PI31:1	0.00249516	0.0017622	0.000973291	0.00091405	0.00155651	0.00165494	0.000450364	0.00138106	0.000422328	0.00106419	0.000339425	0.000467484	0.000898538	0.000300689	0.00096858	0.00117877	0.00173061	0.00066165	0.00108894	0.000722447	0.00023164	0.000617459	0.000848132	0.00057925	0.000809475	0.00059266	0.000770051	0.000570026	0.000693786	0.00174804	0.000784583	0.001811	0.000849601	0.00332932	0.000643973	0.00161718	0.000335538	0.000504694	0.00111215	0.000427758	0.00197907	0.00283283	0.000553018	0.000474254	0.000403278	0.0017796	0.00109285
933.68	PI(O-)42:1	PI31:1	0.00113505	0.00122739	0.000502679	0.001207	0.00119301	0.000562244	0.000970187	0.000511334	0.00072954	0.00362955	0.000683316	0.000656531	0.000742524	0.000380669	0.00090819	0.00113289	0.00272887	0.000430913	0.000879949	0.00106949	0.000726115	0.00128718	0.00175627	0.000198148	0.000631157	0.00153149	0.000216349	0.000454701	0.000847302	0.000419161	0.000938297	0.00357146	0.00103548	0.00237126	0.000321257	0.00052868	0.00130268	0.0012166	0.000437203	0.00152626	0.000981249	0.0025534	0.000291755	0.00029994	0.000477917	0.00472349	0.00107064
931.664	PI(O-)42:2	PI31:1	0.000773306	0.00108536	0.00119928	0.00178889	0.000689962	0.000793379	0.000928839	0.000419943	0.000807591	0.00355509	0.000355057	0.000766456	0.00045779	0.000767676	0.00118217	0.000404267	0.00105535	0.000822554	0.000876335	0.00103113	0.000953134	0.000463255	0.00142731	0.000230885	0.0021746	0.000607388	0.00124598	0.000382671	0.000110963	0.00150114	0.000796908	0.00285561	0.00045614	0.00190391	0.000240882	0.000335432	0.00182367	0.00332397	0.000973889	0.00114346	0.000808867	0.00147766	0.000686075	0.000516382	0.00182341	0.00210638	0.000668102
929.648	PI(O-)42:3	PI31:1	0.000524828	0.000700267	0.00117826	0.0019836	0.00130586	0.00073743	0.000304903	0.000579311	0.000308282	0.00194782	0.000974252	0.002335	0.000836327	0.000141998	0.00111356	0.00125571	0.000397645	0.000381404	0.00101381	0.00231659	0.000462848	0.000673269	0.000351057	0.000544946	0.00179936	0.000543763	0.000151255	0.000490036	0.000399681	0.00283276	0.000626759	0.00129712	0.000600151	0.000808152	0.00129925	0.000390407	0.000231637	0.00233283	0.000248381	0.00110743	0.000922821	0.00154599	0.000413823	0.000944345	0.000763419	0.000568268	0.000515552
923.601	PI(O-)42:6	PI31:1	0.000497401	0.00116662	0.00109116	0.00079932	0.000950355	0.000587314	0.000543769	0.000290411	0.000267118	0.00110177	0.000250741	0.000262532	0.000321312	0.00134814	0.000285968	0.00102399	0.00168865	0.00100638	0.000318312	0.000639367	0.000259368	0.00183221	0.000384345	0.000657883	0.000206674	0.000167076	0.000220043	0.00131129	0.000175466	0.000496212	0.000361973	0.00106058	0.000503721	0.000888462	0.000980794	0.000141966	0.000158645	0.000339504	0.000811901	0.000761588	0.00109866	0.000893699	0.0005449	0.00057806	0.000403278	0.00128106	0.00161433
751.44	PI28:1	PI31:1	0.000574049	0.000514676	0.00324943	0.00280475	0.00081782	0.000466397	0.000515509	0.00197056	0.000337862	0.000957952	0.000412638	0.000381718	0.000403199	0.000494457	0.000241792	0.00283105	0.00320385	0.00035726	0.00106064	0.00113312	0.000656363	0.000270985	0.000372037	0.00046647	0.000340282	0.000690455	0.000984802	0.00127868	0.000386215	0.000765037	0.000397675	0.00734334	0.00174704	0.00183621	0.000619411	0.00135346	0.00341869	0.00158947	0.000639769	0.00133455	0.000398494	0.00142009	0.00135275	0.000159682	0.000565044	0.00417215	0.000711239
749.424	PI28:2	PI31:1	0.00143082	0.000481365	0.00319461	0.00079531	0.000666184	0.000712054	0.000132075	0.00071262	0.000924488	0.000816117	0.000478832	0.00068069	0.00030427	0.000433601	0.00064666	0.00110922	0.000838714	0.000492035	0.000606207	0.000253784	0.000281175	0.000312439	0.000305182	0.00039426	0.000854533	0.000395539	0.000119207	0.000598372	0.000401836	0.0013758	0.000179782	0.00740134	0.000728302	0.00120256	0.00213207	0.000512745	0.00317551	0.0011777	0.000485635	0.000574964	0.000989812	0.000516885	0.00062212	0.000254785	0.000527866	0.00101994	0.000642754
747.408	PI28:3	PI31:1	0.000341731	0.00136576	0.00124456	0.000894	0.000753501	0.000529225	0.00077133	0.000614432	0.000298659	0.0011395	0.000815386	0.00027743	0.000401675	0.000452513	0.000450688	0.00152947	0.00030787	0.00146358	0.000440276	0.000488297	0.00024406	0.00133299	0.000190494	0.000173712	0.000343762	0.000317303	0.00014157	0.000518382	0.000524918	0.000491076	0.000464119	0.00315292	0.000467433	0.00129506	0.000658686	0.000326378	0.00834563	0.00310716	0.000701455	0.000566033	0.000358438	0.000811018	0.00027641	0.000294391	0.000190429	0.000798587	0.000303355
741.361	PI28:6	PI31:1	0.000566044	0.000860783	0.00146405	0.0013469	0.00171555	0.00110278	0.000978664	0.000302118	0.000557401	0.000704352	0.000831496	0.00041836	0.00134067	0.000366194	0.000125713	0.000901758	0.000807976	0.000891164	0.00282987	0.00103331	0.000207379	0.00042906	0.000305881	0.00028289	0.000297486	0.000188402	0.000371996	0.00106123	0.00101294	0.00159103	0.000189558	0.00347681	0.000333192	0.000351306	0.000677047	7.12729e-05	0.00140509	0.000332541	0.000282578	0.00051368	0.000947546	0.000650142	0.000272252	0.000671523	0.000177942	0.00167062	0.00116086
781.487	PI30:0	PI31:1	0.0050766	0.0136462	0.00915829	0.0102054	0.0100998	0.0112353	0.0129805	0.0169913	0.00280483	0.00543284	0.00447059	0.00533318	0.00388318	0.00525075	0.00874941	0.00936562	0.0118445	0.00584483	0.0105353	0.0158618	0.00930923	0.00428334	0.012813	0.00913	0.00957835	0.00828805	0.00546583	0.0061936	0.0122563	0.00930818	0.00842569	0.0116564	0.00498481	0.0105247	0.00303212	0.00720378	0.0122611	0.00446949	0.00934979	0.00989064	0.0199114	0.0211406	0.0166565	0.00916924	0.00559055	0.0103925	0.0169876
779.471	PI30:1	PI31:1	0.0156732	0.0158254	0.0265241	0.0345998	0.0185105	0.0312584	0.0289987	0.0367328	0.0211592	0.0169586	0.0183969	0.0212325	0.00874956	0.0165174	0.0193817	0.0232871	0.0292245	0.0331679	0.0272292	0.0368535	0.0133533	0.010996	0.0282327	0.0160888	0.0129718	0.0199789	0.0160302	0.0153637	0.028864	0.0310554	0.0248336	0.0225519	0.0293671	0.0387665	0.010296	0.0411446	0.0286809	0.00749021	0.0315463	0.013097	0.0354203	0.0312335	0.0296749	0.0133989	0.0226789	0.016492	0.0328528
777.455	PI30:2	PI31:1	0.00242014	0.00168899	0.000882938	0.0013527	0.00341181	0.00156077	0.00134752	0.00356234	0.000963335	0.00208639	0.00368232	0.00122589	0.00133721	0.00122368	0.00167422	0.00287663	0.00234562	0.00314521	0.00227305	0.00841812	0.00264928	0.000914252	0.00204494	0.00262621	0.00286213	0.00107115	0.00101845	0.00754586	0.00126503	0.00579925	0.00125239	0.00768668	0.000849347	0.00184231	0.000726658	0.0031213	0.0036615	0.00377872	0.00161202	0.00364719	0.00462598	0.0069254	0.00162292	0.00144244	0.00241172	0.00237376	0.00353317
769.393	PI30:6	PI31:1	0.000531352	0.000558969	0.000593681	0.000484092	0.00133178	0.000321632	0.000542133	0.00101058	0.000436227	0.00173691	0.000229686	0.000641431	0.000393223	0.000172003	0.000495569	0.000700512	0.00141518	0.000749972	0.000560132	0.000962596	0.000287384	0.000391638	0.000781697	0.000274744	0.000489199	0.000320602	0.000250593	0.000375875	0.000473476	0.000992596	0.000337889	0.00300288	0.00133201	0.00236559	0.000472766	0.000175575	0.000738482	0.00124229	0.000218274	0.000812402	0.000395593	0.000721702	0.000206317	0.000337275	0.000813084	0.000849525	0.00081228
809.518	PI32:0	PI31:1	0.00481878	0.0018614	0.0100274	0.00670756	0.0101403	0.00991387	0.0143923	0.00745211	0.00750211	0.00312306	0.0101808	0.0041395	0.00643761	0.00519994	0.00444414	0.00361088	0.025561	0.00541972	0.00405177	0.0104202	0.0150013	0.016494	0.00830202	0.00469399	0.00725796	0.00585213	0.0100452	0.0041554	0.00810808	0.0188408	0.0116064	0.011905	0.0135281	0.0260646	0.0127299	0.0157833	0.0116414	0.00198972	0.0106709	0.00518468	0.0313553	0.0114267	0.0188231	0.00540132	0.0233368	0.00495263	0.0332135
807.502	PI32:1	PI31:1	0.0157592	0.0140537	0.0167704	0.027902	0.0205459	0.0319261	0.02728	0.0360373	0.0182103	0.0054483	0.0101183	0.0132774	0.0428907	0.00681569	0.0116878	0.0198739	0.0913008	0.0180053	0.0120644	0.0137819	0.0688161	0.0717244	0.0223361	0.0298892	0.0255777	0.0106169	0.020192	0.0120682	0.022015	0.0476451	0.0251729	0.0210127	0.0235401	0.0650427	0.0225884	0.040099	0.0410209	0.00405844	0.0162145	0.0284618	0.0652128	0.0412176	0.0214551	0.0150227	0.0417332	0.023322	0.0863726
805.487	PI32:2	PI31:1	0.0129096	0.0261476	0.0163249	0.0229822	0.0356274	0.0209739	0.0213938	0.0304895	0.0098283	0.0126026	0.0189201	0.0186067	0.0139227	0.0167909	0.0188283	0.0107507	0.036173	0.0117911	0.0219579	0.0273715	0.0208279	0.00844941	0.0278861	0.0180283	0.0218572	0.0165867	0.0191544	0.0234468	0.0178857	0.0304999	0.0200855	0.0203746	0.0221868	0.022327	0.0107948	0.030739	0.0290276	0.012164	0.0302933	0.0165281	0.034234	0.0312827	0.0244433	0.0202359	0.012799	0.0239876	0.0191678
803.471	PI32:3	PI31:1	0.0178534	0.0189255	0.0211619	0.0228319	0.0921193	0.0251041	0.0224037	0.0322841	0.0216791	0.0258234	0.0176858	0.0168034	0.0123562	0.0202753	0.0257912	0.0242492	0.0484261	0.0301599	0.030183	0.0433181	0.00925753	0.010963	0.0340309	0.0207482	0.0197524	0.0254046	0.0193244	0.0247814	0.0223458	0.049481	0.0249104	0.0324872	0.0335658	0.0383586	0.0112885	0.0305121	0.0316318	0.0141163	0.0386509	0.0118083	0.0265595	0.0402324	0.0302481	0.0272828	0.0252845	0.0261818	0.016534
801.455	PI32:4	PI31:1	0.000432464	0.000477338	0.00240679	0.00094457	0.00322528	0.00145224	0.000311596	0.000832334	0.000477034	0.00113113	0.000562731	0.00200201	0.000263257	0.000563871	0.00096905	0.00389588	0.00160229	0.000654009	0.00098535	0.000438122	0.000535488	0.00048858	0.000833307	0.000277407	0.000259387	0.000174145	0.000514266	0.000450041	0.000406953	0.000422928	0.00145087	0.00223892	0.000474031	0.00101671	0.00249296	0.000814133	0.00162965	0.000742394	0.00041135	0.000942978	0.000443385	0.000550962	0.000568858	0.000286823	0.000215687	0.000666082	0.00016534
837.549	PI34:0	PI31:1	0.0079169	0.005114	0.0127052	0.013782	0.0167858	0.00946429	0.0153686	0.0127728	0.00263233	0.00576913	0.00915076	0.00447351	0.015134	0.0114953	0.00555324	0.00509092	0.0258882	0.00547427	0.00950433	0.00962869	0.0250426	0.0250595	0.0140105	0.0212665	0.0133373	0.00732943	0.012116	0.00760099	0.0175553	0.0189393	0.0169943	0.0128477	0.0111421	0.0181287	0.00801878	0.0215652	0.0149074	0.00352109	0.00951341	0.00856179	0.0181653	0.0181337	0.0134995	0.0130174	0.0175064	0.0192177	0.0320931
835.534	PI34:1	PI31:1	0.0886997	0.107003	0.177032	0.126195	0.178785	0.144625	0.188572	0.165336	0.114964	0.105216	0.0965473	0.0956608	0.152877	0.110892	0.0680067	0.102919	0.298991	0.137587	0.113921	0.129282	0.272403	0.308724	0.132821	0.1769	0.146642	0.0985663	0.11056	0.0699606	0.139652	0.192347	0.11199	0.100895	0.161615	0.234321	0.102852	0.2012	0.181194	0.0278931	0.129254	0.135494	0.279068	0.202903	0.121589	0.123171	0.216773	0.157491	0.329079
833.518	PI34:2	PI31:1	0.0577713	0.0536687	0.154774	0.107553	0.0727559	0.0755373	0.102444	0.0820293	0.065593	0.0691864	0.0872709	0.0537669	0.0756388	0.0603358	0.0496241	0.0783053	0.267827	0.105412	0.0748106	0.0931795	0.123934	0.140361	0.0807126	0.0842535	0.125511	0.106905	0.0691018	0.0508199	0.0642581	0.212776	0.071915	0.0986429	0.0882731	0.150754	0.0738276	0.115044	0.108767	0.0171896	0.0943487	0.0908343	0.218047	0.162578	0.131006	0.0999381	0.0730615	0.103449	0.163276
831.502	PI34:3	PI31:1	0.000777013	0.000402297	0.00143784	0.00447201	0.00239382	0.00160785	0.00239966	0.00298001	0.0007691	0.00196583	0.000823361	0.000434063	0.00340572	0.000719287	0.00124914	0.00124891	0.00581977	0.00210154	0.00255763	0.00109367	0.00330564	0.00111426	0.00266692	0.00402139	0.00291171	0.00184278	0.0024658	0.00162582	0.0020625	0.00503215	0.00198384	0.00226028	0.00242268	0.0041833	0.00139981	0.00527325	0.006084	0.000458354	0.00334742	0.00438368	0.0026331	0.00503129	0.00164975	0.00330035	0.00140537	0.00285877	0.00303274
829.487	PI34:4	PI31:1	0.000839132	0.00164652	0.00349579	0.0100795	0.00266298	0.00598611	0.00433379	0.00386937	0.00128908	0.00152912	0.00132405	0.00155989	0.00339713	0.00286384	0.00285945	0.00792967	0.00808001	0.00904611	0.00377908	0.00641149	0.00435106	0.00134105	0.00887042	0.00247301	0.00520461	0.00190983	0.00522961	0.0042088	0.00616678	0.00594462	0.00305885	0.00706078	0.00481999	0.00465886	0.00107029	0.00570777	0.00611417	0.00727316	0.00577854	0.00220562	0.00491743	0.0104469	0.00657889	0.00347202	0.00147944	0.00947931	0.00502751
827.471	PI34:5	PI31:1	0.00247262	0.00178233	0.00549957	0.00705465	0.00866039	0.0029303	0.00651169	0.0150122	0.00545854	0.00386174	0.00676298	0.00458202	0.00357226	0.0096959	0.011149	0.0140691	0.00502106	0.0047217	0.00743379	0.00898114	0.00203754	0.00070069	0.009958	0.00684872	0.00456319	0.00323724	0.00690749	0.0120775	0.0123917	0.0158749	0.00856425	0.0063319	0.0141594	0.00834242	0.00567197	0.00922209	0.0109711	0.00581406	0.0134384	0.00764067	0.00895044	0.0145601	0.0103429	0.0118485	0.000490404	0.0106372	0.00263206
825.455	PI34:6	PI31:1	0.00101941	0.000374842	0.000737552	0.00194261	0.00153059	0.00101351	0.00048368	0.00111972	0.000416626	0.000620953	0.00150221	0.000736055	0.000787278	0.00124481	0.00308503	0.0019142	0.00149934	0.00173221	0.000988663	0.000905513	0.000743733	0.000493903	0.000501271	0.00113845	0.000727536	0.000375273	0.00108863	0.000485765	0.00084003	0.00115149	0.000608342	0.00220505	0.00187366	0.00284766	0.00090504	0.00086556	0.000758964	0.00455641	0.00068362	0.000400812	0.00120336	0.00184013	0.000432633	0.000979662	0.000552556	0.00207237	0.00181083
865.581	PI36:0	PI31:1	0.00962941	0.0121646	0.0104332	0.00566364	0.0193117	0.0113099	0.0179197	0.0150273	0.00590297	0.0106597	0.00743386	0.00564101	0.0106026	0.0148129	0.0106591	0.00830789	0.0158651	0.00704191	0.0145871	0.0122183	0.0271981	0.0214533	0.0167369	0.0219529	0.01183	0.00933811	0.0123919	0.00780738	0.0118663	0.0127764	0.0122268	0.0141429	0.0124297	0.0141578	0.00710924	0.0209063	0.0101499	0.00320752	0.013334	0.00885235	0.0181646	0.0231935	0.0109315	0.0139267	0.0171349	0.00291614	0.0197313
863.565	PI36:1	PI31:1	0.109832	0.144491	0.210292	0.140959	0.233177	0.135234	0.208054	0.141152	0.139913	0.105705	0.105738	0.100037	0.0996584	0.185728	0.123097	0.136105	0.222868	0.131249	0.121527	0.150888	0.221881	0.231703	0.15603	0.219337	0.154885	0.153964	0.113409	0.089623	0.119394	0.174835	0.124095	0.123662	0.161341	0.201717	0.109452	0.173513	0.0870321	0.0558467	0.140219	0.126686	0.13637	0.18387	0.113116	0.183607	0.183621	0.114611	0.195134
861.549	PI36:2	PI31:1	0.267873	0.294495	0.419239	0.347988	0.392322	0.264742	0.38084	0.263158	0.283871	0.281157	0.261951	0.195936	0.342632	0.356221	0.264553	0.214685	0.544333	0.286269	0.203801	0.300924	0.382715	0.400995	0.281018	0.339067	0.371746	0.384008	0.213441	0.230362	0.16944	0.511478	0.238106	0.295044	0.25661	0.408475	0.248611	0.297651	0.166648	0.158152	0.29003	0.29934	0.405174	0.375239	0.328911	0.344753	0.355667	0.317896	0.418484
859.534	PI36:3	PI31:1	0.0549101	0.076225	0.11338	0.0712077	0.0763681	0.0805321	0.113561	0.0585555	0.073113	0.0703984	0.0494285	0.0517755	0.0933757	0.0735606	0.0485467	0.067306	0.138154	0.0620125	0.0670598	0.0802349	0.0874714	0.0608962	0.074143	0.0803519	0.14319	0.100821	0.0672574	0.0568535	0.0561859	0.133697	0.0644109	0.0620583	0.0636006	0.0798807	0.072364	0.0981245	0.03713	0.0215599	0.101426	0.077794	0.0985854	0.086913	0.0913619	0.108058	0.0876127	0.0807142	0.101738
857.518	PI36:4	PI31:1	0.0796615	0.085167	0.106872	0.105403	0.146161	0.148341	0.155021	0.16237	0.102679	0.0912887	0.0754522	0.0918368	0.121398	0.0971576	0.108084	0.151798	0.209117	0.092938	0.0934228	0.131908	0.118136	0.0964236	0.118788	0.138407	0.177133	0.0845299	0.110384	0.101028	0.0950314	0.185363	0.120456	0.0967233	0.0840764	0.112346	0.113348	0.137198	0.0890491	0.029835	0.139056	0.121392	0.112836	0.130419	0.169544	0.186843	0.128064	0.0862403	0.112476
855.502	PI36:5	PI31:1	0.00119895	0.000487588	0.00339872	0.000615085	0.00206092	0.00401016	0.00265132	0.00150946	0.00053281	0.000754277	0.000471814	0.0006974	0.00214568	0.00090249	0.00344854	0.00138445	0.00498032	0.0019631	0.00179694	0.00186665	0.00163607	0.000499387	0.00163403	0.000948604	0.00226315	0.000473185	0.00127114	0.00137633	0.000488828	0.000609564	0.000536089	0.000694494	0.000862797	0.00284199	0.00155473	0.00211573	0.00104646	0.000718144	0.00203319	0.00121337	0.00180918	0.00184658	0.00139522	0.00275975	0.00270545	0.00222315	0.000911228
853.487	PI36:6	PI31:1	0.00288344	0.00438994	0.00112106	0.00543195	0.00402205	0.00216536	0.00210814	0.00373134	0.00140526	0.00362714	0.00102721	0.00427621	0.0011805	0.00186003	0.00398899	0.0060865	0.005538	0.00552898	0.00234563	0.00333845	0.00198483	0.00206336	0.00305756	0.00238295	0.0023183	0.000778824	0.000688383	0.00200305	0.00209725	0.00404144	0.00334064	0.0044391	0.0027659	0.00434392	0.000480061	0.00185259	0.00114925	0.00319287	0.00820835	0.00364703	0.0024603	0.00366303	0.00164599	0.00181743	0.00188471	0.00549484	0.00225615
893.612	PI38:0	PI31:1	0.000783536	0.00439635	0.00101793	0.0018085	0.00223712	0.00122278	0.00150577	0.002122	0.000744509	0.00336631	0.000627171	0.00174793	0.000695276	0.000833393	0.00358107	0.00341999	0.0018987	0.00442587	0.003337	0.00204918	0.00232319	0.0103923	0.00262244	0.00175435	0.00213442	0.00137855	0.000993388	0.00135148	0.000837876	0.00718686	0.00365359	0.00582722	0.00287832	0.00683965	0.00154634	0.00169418	0.00357063	0.00126582	0.00148619	0.002462	0.00555848	0.00399537	0.00142541	0.000606692	0.00420533	0.00120524	0.00580979
891.596	PI38:1	PI31:1	0.00390508	0.00339298	0.00506146	0.00831244	0.0146332	0.00450376	0.00499044	0.00460163	0.00596783	0.0102781	0.0042913	0.00174712	0.00840788	0.00215564	0.0105383	0.00533834	0.00951787	0.0060201	0.0112702	0.0131373	0.00660681	0.00539373	0.00657988	0.00693988	0.00929304	0.00787083	0.00450958	0.00567133	0.00220229	0.00702762	0.00816176	0.0117111	0.0106621	0.00590556	0.00955733	0.00650916	0.00102598	0.00187375	0.00308349	0.0045298	0.00943388	0.0134195	0.00487608	0.00433829	0.0087254	0.00636027	0.010432
889.581	PI38:2	PI31:1	0.0255977	0.0307054	0.0355931	0.0434937	0.0373542	0.0408417	0.0457546	0.0279196	0.0365918	0.0196653	0.0194819	0.025532	0.0417299	0.0357397	0.0346177	0.0478627	0.0421448	0.0322647	0.0219609	0.0306571	0.0542628	0.0333762	0.0424294	0.0403627	0.0515861	0.033417	0.0387021	0.0300972	0.0348331	0.043045	0.0255437	0.0347419	0.0370371	0.0321989	0.048061	0.0295052	0.0206525	0.0142712	0.0369703	0.0260889	0.0463469	0.0417217	0.0291392	0.037854	0.0219496	0.0195304	0.0612519
887.565	PI38:3	PI31:1	0.230407	0.294179	0.321293	0.276155	0.300958	0.392286	0.367388	0.285478	0.36826	0.216899	0.200162	0.263526	0.43349	0.284365	0.360513	0.462053	0.314416	0.270857	0.228434	0.304841	0.441057	0.25149	0.330417	0.331558	0.400249	0.315792	0.28726	0.265392	0.284507	0.34582	0.241761	0.287491	0.238488	0.259926	0.295188	0.288916	0.251491	0.126568	0.409797	0.272711	0.328567	0.298053	0.314252	0.387796	0.320394	0.331924	0.429466
885.549	PI38:4	PI31:1	0.935738	1.12525	0.937791	0.905874	1.313	1.05456	1.57122	1.37258	1.06631	0.703602	0.7235	1.16629	1.12997	1.18906	1.33868	1.60394	1.03291	0.880153	0.76097	0.947932	1.19002	0.682317	1.16823	1.14724	1.10796	0.852202	1.08915	1.06176	1.12199	1.25238	0.964819	0.950893	0.867618	0.872838	0.927161	0.894821	0.73013	0.526279	1.36604	1.01419	0.920593	1.12672	1.12907	1.43079	1.02711	0.844424	0.893152
883.534	PI38:5	PI31:1	0.0561786	0.0497345	0.0433864	0.0793615	0.0836143	0.0935515	0.109831	0.0751525	0.0557419	0.0566029	0.0509906	0.0693223	0.0764898	0.0808108	0.0622224	0.0596723	0.1142	0.0425644	0.0553939	0.0753981	0.0655912	0.0576164	0.0667683	0.0635681	0.084872	0.0540595	0.0535987	0.0599762	0.0566747	0.0949605	0.065126	0.0432132	0.041241	0.0666132	0.0502272	0.0732814	0.0517861	0.0295159	0.0897709	0.0725859	0.0647207	0.0847627	0.057716	0.0557165	0.0848178	0.0616104	0.0631275
881.518	PI38:6	PI31:1	0.0152274	0.0064783	0.0143628	0.0215077	0.0148426	0.015538	0.0247755	0.0131187	0.00704878	0.00258437	0.0188563	0.0119621	0.0164101	0.0158299	0.0136626	0.00609508	0.0359323	0.0136897	0.00992397	0.0115691	0.0195247	0.0159642	0.0172024	0.0150354	0.0186635	0.0100184	0.0144003	0.0142355	0.00955302	0.0272032	0.0097091	0.00963991	0.0124894	0.0312938	0.0247047	0.0177049	0.0121714	0.00541093	0.017334	0.0205818	0.0289981	0.0272873	0.0170281	0.0144147	0.033954	0.0227854	0.024885
921.643	PI40:0	PI31:1	0.00110273	0.00254831	0.00599531	0.00316231	0.00296528	0.00172312	0.000800631	0.000984715	0.000927339	0.00163592	0.000603564	0.000887454	0.00083411	0.00101934	0.00320087	0.00142292	0.003571	0.00133125	0.00320405	0.00291069	0.00114087	0.00257226	0.000755263	0.00181826	0.00138896	0.00184007	0.000465844	0.00198965	0.000251821	0.00237542	0.00235389	0.00412477	0.000372779	0.000906753	0.000328553	0.000227001	0.000800301	0.00124229	0.00189771	0.00296089	0.00314679	0.00228706	0.00167182	0.00110882	0.000378304	0.00410513	0.00550457
919.628	PI40:1	PI31:1	0.000963371	0.00785046	0.00594548	0.00801236	0.00329837	0.00244679	0.00223234	0.00117146	0.00117967	0.00256154	0.00276772	0.00259914	0.00059801	0.00344451	0.000938503	0.00391245	0.00632719	0.00698125	0.00122024	0.00520275	0.00492741	0.00725385	0.00371771	0.00272144	0.00399257	0.0020108	0.000546513	0.00282062	0.000913826	0.00898627	0.00394473	0.00529077	0.00171735	0.00646521	0.00292475	0.00062936	0.00306379	0.00344642	0.00140226	0.00218807	0.00670907	0.00721111	0.00478639	0.00196172	0.0019216	0.00585478	0.00844197
917.612	PI40:2	PI31:1	0.0052769	0.00244654	0.00637752	0.00394291	0.00547565	0.0039912	0.00447642	0.00577196	0.00424431	0.00553014	0.00135706	0.0043052	0.0048129	0.00207492	0.00254082	0.00347622	0.00910608	0.00271001	0.00287429	0.00622533	0.00939949	0.00711529	0.00531132	0.00339577	0.00787085	0.00463194	0.00199406	0.00391873	0.00626912	0.00624358	0.00660605	0.00665891	0.00410057	0.00515249	0.0029312	0.000645802	0.00326675	0.000334222	0.00224165	0.00467008	0.0118282	0.0109993	0.00426842	0.00308807	0.0079038	0.00810687	0.0139557
915.596	PI40:3	PI31:1	0.00497623	0.00852163	0.0052998	0.00938533	0.00731438	0.0109486	0.0078723	0.00650195	0.00501162	0.00360728	0.00503874	0.00429855	0.00646892	0.00288634	0.0050243	0.00583346	0.0126805	0.00380945	0.0087361	0.0160749	0.00767259	0.00912236	0.00710311	0.00542346	0.00715167	0.00648792	0.00396587	0.00751479	0.00541535	0.0153172	0.00515646	0.00879797	0.0037996	0.00793603	0.00423872	0.00441088	0.0169307	0.00149703	0.00524414	0.00537531	0.0111277	0.0118685	0.00842684	0.00631779	0.00721445	0.0048692	0.0118289
913.581	PI40:4	PI31:1	0.0205401	0.0117093	0.0108483	0.012974	0.0150708	0.0213654	0.015505	0.0189458	0.0220526	0.0163416	0.0198248	0.0143571	0.0327581	0.0151157	0.0161423	0.0145773	0.0176486	0.0104597	0.0194885	0.0183108	0.0201114	0.0236255	0.0207977	0.021593	0.0201525	0.016655	0.0227877	0.0181476	0.0200253	0.0247207	0.0122108	0.0118017	0.0159641	0.0165566	0.0145632	0.0215893	0.019688	0.00823717	0.0212284	0.0139953	0.0230226	0.0268119	0.0166814	0.0220838	0.00978766	0.0227696	0.0221969
911.565	PI40:5	PI31:1	0.0543805	0.0206963	0.033364	0.034997	0.0374174	0.0787183	0.0756766	0.0399224	0.0335364	0.014941	0.0705631	0.0243148	0.0691959	0.0390932	0.068705	0.039129	0.0728869	0.0328822	0.0247636	0.0341872	0.0490028	0.0572243	0.0421807	0.0385604	0.0341834	0.0295986	0.047848	0.0350927	0.0399975	0.0476977	0.0430663	0.025176	0.0382243	0.0824615	0.0508219	0.0409064	0.0408928	0.0106221	0.0509042	0.0458804	0.067733	0.0592982	0.0418051	0.0412164	0.0536584	0.0545901	0.0535426
909.549	PI40:6	PI31:1	0.0869065	0.0320979	0.056541	0.0774078	0.0417573	0.0828266	0.0960285	0.0474281	0.0294803	0.0196725	0.083526	0.0355237	0.0705984	0.0528211	0.0832889	0.0609665	0.103097	0.0419044	0.0370484	0.0467413	0.061836	0.0553721	0.067035	0.0502264	0.0547113	0.0343581	0.0568242	0.0493521	0.0427958	0.0499889	0.0374296	0.0307212	0.0597582	0.103785	0.0743959	0.0433171	0.0339962	0.0202444	0.0396765	0.0519968	0.0898818	0.0679561	0.0516346	0.0466557	0.0652366	0.0695032	0.0919199
945.643	PI42:2	PI31:1	0.0049832	0.0227819	0.0118658	0.0168394	0.00941682	0.0148694	0.00441663	0.00890359	0.00858306	0.0142608	0.00605032	0.01582	0.0100406	0.00832474	0.00764807	0.0306465	0.00845033	0.0083892	0.011191	0.0104458	0.0161618	0.012755	0.0159039	0.0105955	0.0124039	0.0115537	0.00449541	0.0136822	0.00858668	0.0166635	0.0152246	0.00871496	0.00515661	0.00515733	0.00456472	0.000670356	0.0175184	0.00340152	0.00373913	0.0175051	0.0116596	0.0236761	0.00858613	0.00826892	0.0154188	0.0143411	0.0183229
943.628	PI42:3	PI31:1	0.0230066	0.0304032	0.0270784	0.0361307	0.0384058	0.0262067	0.016792	0.0241779	0.0158963	0.0368929	0.0139081	0.0359141	0.0117407	0.0213174	0.0234527	0.0625912	0.0345112	0.0204888	0.0202525	0.0398364	0.029555	0.0239104	0.0272875	0.0213132	0.0302898	0.0183705	0.00878275	0.0254337	0.012253	0.0530514	0.0309122	0.0196772	0.0126675	0.0179625	0.0107104	0.00204381	0.0173493	0.0132003	0.00981415	0.0314709	0.038884	0.0469051	0.0249771	0.0219631	0.0294376	0.0408444	0.0296097
941.612	PI42:4	PI31:1	0.00153535	0.00327365	0.00374323	0.00108982	0.00166078	0.00155175	0.00158594	0.00200493	0.001159	0.00138175	0.000614411	0.00114757	0.000308981	0.00172585	0.000870124	0.00129034	0.00156277	0.000815373	0.00139702	0.00153634	0.00392561	0.00276969	0.00148969	0.000802774	0.00335585	0.00209905	0.000821467	0.00219487	0.00096823	0.00444793	0.00392405	0.00221356	0.000503721	0.00137937	0.00105351	0.000951826	0.00198642	0.00258157	0.00134351	0.00185285	0.00555751	0.00361802	0.00198793	0.00173077	0.000899642	0.00281562	0.00595955
939.596	PI42:5	PI31:1	0.00193045	0.00273756	0.00111283	0.00174189	0.00271619	0.0043243	0.00411158	0.00298115	0.0020482	0.000704352	0.00191214	0.00329554	0.00362353	0.0023436	0.00178771	0.00260376	0.00506522	0.00245085	0.0034674	0.00186084	0.00138797	0.00123298	0.0020518	0.00309769	0.00436087	0.00106867	0.00103832	0.00323474	0.00431058	0.00719371	0.00246199	0.00206698	0.000722846	0.00100514	0.00221414	0.000528028	0.000418585	0.00220389	0.00162675	0.0055159	0.00261169	0.00464139	0.00406685	0.00201268	0.00319387	0.00407129	0.00369933
975.69	PI44:1	PI31:1	0.000619713	0.000551282	0.000772219	0.000535776	0.000415147	0.000269963	0.000795128	0.000491696	0.000321468	0.000704352	0.000946179	0.000587475	0.000343897	0.000572641	0.000125713	0.000887256	0.00225511	0.000787256	0.000171954	0.00107913	0.000423856	0.000366152	0.000913449	0.000244513	0.000956652	0.00012949	0.000299215	0.000338599	0.00032023	0.00113745	0.000857119	0.000853052	0.000326594	0.000734148	0.00120769	0.000146747	0.000553024	0.000718384	0.0011182	0.000850589	0.000441728	0.0020453	0.00036264	0.000139754	0.00187251	0.000610913	0.000838906
971.659	PI44:3	PI31:1	0.000369159	0.00110622	0.000619249	0.0016031	0.00176506	0.0011303	0.000160037	0.000468471	0.00170285	0.000968022	0.000471814	0.000423997	0.000646781	0.000179399	0.000204431	0.00066855	0.00042326	0.00188165	0.000203575	0.00029705	0.000472668	0.00029018	0.00107485	0.000962858	0.00209127	0.00110261	0.000536929	0.00124256	0.00141127	0.00164479	0.00115109	0.00134158	0.000714852	0.00176557	0.00110543	8.96706e-05	0.00124123	0.000957285	0.00153086	0.000566341	0.00197645	0.00282601	0.000758939	0.000388737	0.00302303	0.00121303	0.00168246
969.643	PI44:4	PI31:1	0.00335386	0.0107209	0.00735168	0.00482043	0.0178098	0.0153698	0.00512728	0.00631955	0.00673693	0.00596699	0.00600183	0.00776462	0.0101398	0.00464959	0.00852618	0.0166853	0.0073901	0.0109854	0.0081195	0.0103622	0.0106715	0.00951383	0.00954289	0.00619647	0.0149348	0.00619666	0.00292485	0.010136	0.00801005	0.0101338	0.00922303	0.00609276	0.00277922	0.00927398	0.00487163	0.000323625	0.00357063	0.00724291	0.00417666	0.00596429	0.0111692	0.0151658	0.00691431	0.00664309	0.00465544	0.00909465	0.0151757
967.628	PI44:5	PI31:1	0.025458	0.0310823	0.0375904	0.0453492	0.0527295	0.0431577	0.0433266	0.0470261	0.045409	0.0216637	0.0241123	0.039878	0.0263518	0.0203349	0.0346767	0.0575787	0.033281	0.026538	0.0351784	0.0408752	0.0352986	0.0167535	0.0360418	0.0287708	0.039118	0.025457	0.011243	0.0375866	0.0321431	0.0587858	0.0374749	0.0264224	0.0207857	0.0172342	0.0218936	0.00235316	0.0211694	0.0184994	0.0146911	0.0414314	0.036532	0.0562264	0.0338001	0.0357592	0.0250813	0.0396847	0.0381083
454.293	LysoPE16:0	PE31:1	0.0279477	0.0340511	0.0467858	0.0256611	0.0418021	0.0268785	0.040106	0.0361547	0.0244082	0.0250181	0.0244097	0.0234428	0.0203405	0.0230327	0.0187108	0.0487812	0.0561608	0.016437	0.0276904	0.0399844	0.0253919	0.0225066	0.0202028	0.0242785	0.0147019	0.0231931	0.010955	0.0200296	0.010452	0.0164973	0.0126686	0.0148717	0.0240944	0.0305494	0.0140014	0.0200176	0.0221495	0.0262729	0.02696	0.0248815	0.0170487	0.0167886	0.0162215	0.0160064	0.0183713	0.0164941	0.015701
452.278	LysoPE16:1	PE31:1	0.00199731	0.00255654	0.00568374	0.00304164	0.00533337	0.00554112	0.00615279	0.00805823	0.00284467	0.00255149	0.00151555	0.00269715	0.00419261	0.000658642	0.000811802	0.0114998	0.00928782	0.00240822	0.00219877	0.00290918	0.0108091	0.00633696	0.00249349	0.00325877	0.00374081	0.00221162	0.00151291	0.00284493	0.00231228	0.00257825	0.0018796	0.00250544	0.00309778	0.00386752	0.00130027	0.00314393	0.00285958	0.00241798	0.00405612	0.00284076	0.00243439	0.00413759	0.00147658	0.000955975	0.00518858	0.00164368	0.00348371
482.325	LysoPE18:0	PE31:1	0.0252139	0.0450409	0.038643	0.0277059	0.0595244	0.0290543	0.0404788	0.0310358	0.0257774	0.0275989	0.020955	0.0201383	0.0226756	0.0281137	0.0209416	0.0424411	0.0396243	0.0197258	0.0297197	0.031856	0.0254993	0.031647	0.021574	0.0268006	0.0170563	0.0253018	0.0128247	0.0191825	0.0118246	0.0166879	0.0124071	0.0220504	0.0272769	0.0298478	0.0145247	0.0231111	0.0258909	0.029706	0.0309533	0.0264379	0.0193339	0.0162349	0.0170176	0.0190045	0.0186669	0.0138653	0.0144296
480.309	LysoPE18:1	PE31:1	0.0351376	0.0820654	0.0813739	0.037244	0.128903	0.038721	0.0874508	0.0757364	0.0545511	0.0446892	0.0247003	0.0648703	0.0324584	0.0509859	0.0186156	0.0926164	0.0519853	0.0246232	0.04225	0.0708412	0.0727671	0.0422438	0.0422457	0.0562501	0.0324122	0.0621757	0.0210562	0.0247856	0.0225187	0.024848	0.0335172	0.0455052	0.0780586	0.0447247	0.0218426	0.0298324	0.0375453	0.0315205	0.0651554	0.0255901	0.0237756	0.0470011	0.0253913	0.0592138	0.0430151	0.0302011	0.0221912
478.293	LysoPE18:2	PE31:1	0.0752444	0.1299	0.169454	0.0659468	0.128364	0.0768812	0.153789	0.0927597	0.10106	0.089675	0.052881	0.0967679	0.0667282	0.0670512	0.0390924	0.140784	0.1189	0.0511348	0.0696848	0.113255	0.0883114	0.0852164	0.0892413	0.0760873	0.0708561	0.144211	0.0399923	0.0433882	0.02813	0.0700274	0.0483317	0.0962782	0.0939618	0.0919891	0.0318608	0.0659015	0.0499186	0.0496998	0.113207	0.0349581	0.0460812	0.0602666	0.0551875	0.0682817	0.0913784	0.0510655	0.0484156
506.325	LysoPE20:2	PE31:1	0.00258876	0.00290674	0.00315821	0.00231063	0.00360859	0.00144102	0.00129338	0.00166769	0.00151354	0.000827521	0.00097808	0.000954778	0.00112181	0.00114663	0.00079291	0.00316469	0.00282596	0.0046836	0.00499782	0.0039437	0.0031309	0.00409187	0.0074316	0.00138268	0.00121103	0.00154992	0.000755734	0.000973859	0.000595482	0.00148555	0.00112001	0.00507826	0.00803095	0.00336632	0.00263799	0.00639409	0.0032876	0.00263856	0.00955868	0.00108649	0.000990696	0.00163072	0.000948506	0.00154082	0.00169717	0.00108279	0.000761818
650.512	PE(O-)30:0	PE31:1	0.00204475	0.0039683	0.00475234	0.00456156	0.00424346	0.00292404	0.00395194	0.00366066	0.00487527	0.00265157	0.00276408	0.00331853	0.00156657	0.00145523	0.00238775	0.00464443	0.0033155	0.00235382	0.0033618	0.00452205	0.00376594	0.00149601	0.00362955	0.00293904	0.00373162	0.0025241	0.001482	0.00273752	0.00228287	0.00222669	0.00324102	0.00195179	0.00226966	0.00295902	0.00117121	0.000618278	0.00226398	0.00192273	0.00163144	0.0049195	0.00272628	0.00312369	0.00292369	0.00304683	0.00201662	0.0027218	0.00296383
648.497	PE(O-)30:1	PE31:1	0.00552424	0.0101	0.00823267	0.00805261	0.0104737	0.00573291	0.00799748	0.0111504	0.00717679	0.00488207	0.00464732	0.00656506	0.00202215	0.00374317	0.00399853	0.00762642	0.00500984	0.00317898	0.0045712	0.00836831	0.00554705	0.00269179	0.00361314	0.00530065	0.00416585	0.00383393	0.00230434	0.00487349	0.00536564	0.00419592	0.00706311	0.00226415	0.00408898	0.00336099	0.00263653	0.00101414	0.00514442	0.00624136	0.00421975	0.00766713	0.00317331	0.00487816	0.00456409	0.00606883	0.00337732	0.00378834	0.00302467
674.512	PE(O-)32:2	PE31:1	0.00131454	0.00160479	0.00165797	0.00140408	0.00159926	0.001152	0.00208782	0.00212389	0.0018236	0.000811181	0.00130825	0.000780831	0.000658919	0.000736741	0.00114749	0.00145291	0.00203165	0.000698425	0.00105682	0.00186593	0.00105596	0.00132396	0.00138558	0.000820474	0.00113859	0.00075474	0.000662046	0.000716183	0.00109077	0.00104729	0.00155556	0.00141921	0.00124801	0.00192465	0.000638785	0.000664441	0.00154822	0.00112464	0.000976943	0.001607	0.00145546	0.00139247	0.00119407	0.00107676	0.000995112	0.000975972	0.00181078
706.575	PE(O-)34:0	PE31:1	0.00205187	0.00441172	0.00236808	0.00310995	0.00281988	0.00210345	0.0019728	0.00563676	0.00208085	0.00161845	0.00172475	0.00219077	0.00131651	0.00161979	0.00148262	0.00391324	0.00191748	0.00108635	0.00181872	0.0031729	0.00174067	0.00182592	0.00116628	0.00200504	0.00147595	0.00137064	0.00126503	0.00180024	0.00228917	0.00157781	0.00336444	0.00149446	0.00127102	0.00240007	0.000642027	0.00138055	0.00203086	0.00177963	0.00134433	0.00277073	0.00219422	0.00231791	0.00114275	0.00243716	0.00166806	0.00163109	0.00308494
704.559	PE(O-)34:1	PE31:1	0.005017	0.00757763	0.0077505	0.00452592	0.00663897	0.00549383	0.00404316	0.00539406	0.00451346	0.00512733	0.0049974	0.00429457	0.00452581	0.00445303	0.00414826	0.00868434	0.00629532	0.0032346	0.00500485	0.00705698	0.00464937	0.00804955	0.00544573	0.00529163	0.00569273	0.00453212	0.00524425	0.00681585	0.00520081	0.00468063	0.0047228	0.00762861	0.00519099	0.00616948	0.00358157	0.00697248	0.00593839	0.0043071	0.00554794	0.00432267	0.00736019	0.00743002	0.00305651	0.00620203	0.00385376	0.00449625	0.00505116
702.544	PE(O-)34:2	PE31:1	0.00720329	0.00543522	0.0064054	0.00448909	0.00650696	0.00431533	0.00432239	0.00330995	0.00612301	0.00520494	0.00608477	0.00481158	0.00221735	0.00356567	0.00417758	0.00657284	0.00540017	0.00413493	0.00682197	0.00329458	0.00317326	0.00657096	0.00573888	0.00592658	0.00725866	0.00460027	0.00535507	0.00998718	0.00411844	0.00482672	0.00332058	0.00856595	0.00607561	0.00644307	0.00372052	0.00439362	0.00547785	0.0045344	0.00466001	0.0049692	0.00638259	0.00424585	0.00359515	0.00449381	0.00424404	0.00371442	0.00462811
700.528	PE(O-)34:3	PE31:1	0.00391832	0.00394707	0.00519608	0.00387007	0.00559064	0.00264969	0.00300005	0.00332883	0.0036534	0.00304099	0.0030954	0.00256814	0.00159717	0.00248002	0.00357134	0.00512782	0.00559598	0.00371155	0.0032315	0.00406296	0.00387646	0.00348754	0.0029114	0.004155	0.003855	0.00250515	0.0032931	0.00274544	0.00299858	0.00224498	0.0029367	0.00633306	0.00364489	0.00468717	0.00260621	0.00332375	0.00474669	0.0040638	0.00446278	0.00338012	0.00257462	0.00417848	0.00165715	0.00335469	0.0029884	0.00250491	0.00283351
698.512	PE(O-)34:4	PE31:1	0.0120305	0.0156558	0.0169932	0.0173326	0.0160297	0.0153417	0.0117126	0.0129694	0.00924951	0.00755815	0.00753485	0.0113162	0.00708533	0.00675035	0.0062178	0.025795	0.0164259	0.0132012	0.0130384	0.0159556	0.0100316	0.0139944	0.011944	0.0141403	0.00930035	0.00798034	0.00655361	0.0100156	0.00747527	0.0104242	0.00759269	0.0112754	0.00838402	0.0125999	0.00779739	0.00484675	0.0164199	0.0141474	0.0123207	0.00918895	0.00688565	0.00958264	0.00811137	0.0114762	0.0062627	0.00949694	0.00941193
728.559	PE(O-)36:3	PE31:1	0.0141294	0.0116914	0.0143717	0.0122797	0.0169827	0.00567483	0.00971962	0.00828205	0.0127825	0.0121786	0.0126048	0.00762711	0.00677175	0.00957966	0.00992886	0.0198925	0.0206284	0.00940388	0.0133249	0.00862622	0.0122429	0.0103785	0.0116577	0.0094878	0.013018	0.0113938	0.0135534	0.0208096	0.00950169	0.00987452	0.00836775	0.0228599	0.0103424	0.0153148	0.0113321	0.0127405	0.00911254	0.00773832	0.0110671	0.0085596	0.00906163	0.0100045	0.00634456	0.0100792	0.00979992	0.00844116	0.00817433
726.544	PE(O-)36:4	PE31:1	0.0276259	0.0154178	0.0278695	0.0277992	0.028422	0.017351	0.0161203	0.00993866	0.0232588	0.0200396	0.0231635	0.0116429	0.0136356	0.016459	0.0218194	0.0288831	0.0250378	0.0141653	0.0261851	0.013315	0.0237517	0.018287	0.0270958	0.0147413	0.0215837	0.0143879	0.0241959	0.0610729	0.0191887	0.0222994	0.015539	0.0434501	0.0193842	0.0272198	0.0147002	0.015128	0.0158839	0.021581	0.0156403	0.0193118	0.0149756	0.0127666	0.0111099	0.0285887	0.0109977	0.01118	0.00777054
724.528	PE(O-)36:5	PE31:1	0.0167811	0.00775992	0.0117321	0.010843	0.0131355	0.00999912	0.00950603	0.00839761	0.0122041	0.00624334	0.0136474	0.0076044	0.00504323	0.00810593	0.0160226	0.0145599	0.00996114	0.00757795	0.00770312	0.00987793	0.00989835	0.00833602	0.0100135	0.00856601	0.0101613	0.00540789	0.0147827	0.0139982	0.010032	0.00649329	0.00820029	0.0309595	0.0113766	0.0182267	0.00909896	0.0124552	0.010883	0.0122958	0.00890986	0.0107767	0.00646729	0.00895399	0.0053799	0.014478	0.00830333	0.00748123	0.00437278
722.512	PE(O-)36:6	PE31:1	0.00275085	0.00218805	0.00284476	0.00175666	0.00283599	0.00287553	0.00255048	0.00217323	0.00239134	0.00123379	0.00241438	0.00147131	0.00115307	0.00184711	0.00335929	0.00225001	0.00237481	0.00159203	0.00164225	0.00210056	0.00300844	0.00138417	0.0023967	0.00160523	0.00174024	0.00107881	0.00237455	0.00141839	0.00242233	0.000840171	0.00113395	0.00312902	0.0023397	0.00709396	0.0024303	0.00245553	0.00175105	0.00286585	0.00159391	0.00177681	0.00166199	0.00216403	0.000954921	0.00131863	0.00187001	0.00252969	0.00175692
754.575	PE(O-)38:4	PE31:1	0.0211786	0.0241156	0.0217813	0.0346776	0.0348996	0.0206272	0.0239034	0.0200382	0.0233786	0.0234621	0.0368526	0.0216618	0.0226513	0.0256557	0.0315694	0.0259307	0.0290917	0.016651	0.0241427	0.0214652	0.0229861	0.023286	0.025098	0.0192914	0.0233634	0.0167035	0.0211937	0.0444923	0.0214209	0.032435	0.0204292	0.0341274	0.029521	0.0277984	0.0209959	0.0395597	0.0209066	0.0404363	0.0341481	0.0232057	0.0275152	0.0280739	0.0175495	0.0384739	0.0220977	0.0159756	0.0163353
752.559	PE(O-)38:5	PE31:1	0.0550661	0.0361769	0.0505398	0.0541949	0.0563791	0.0349935	0.0405837	0.0331735	0.0418971	0.0407774	0.0556072	0.0335583	0.0293632	0.0379081	0.0499804	0.0517391	0.0408418	0.0294113	0.0494562	0.0387201	0.0557574	0.0428208	0.0511986	0.0346458	0.0432795	0.028586	0.0453634	0.0919311	0.0420258	0.0366162	0.0308043	0.0823744	0.0486382	0.0484532	0.0357048	0.0460344	0.0343808	0.0456296	0.0444481	0.0410711	0.0321569	0.0367814	0.0219931	0.0504965	0.0363032	0.0274156	0.0186723
750.544	PE(O-)38:6	PE31:1	0.0631265	0.033003	0.0511918	0.0437345	0.0449073	0.0338726	0.0401758	0.0284799	0.0357525	0.0241925	0.046282	0.0246145	0.0248414	0.0376414	0.0484242	0.0451153	0.0449738	0.0268287	0.04173	0.0383531	0.0482775	0.0285691	0.0463392	0.0346828	0.0369937	0.0258967	0.0449775	0.054747	0.0317084	0.02517	0.0231645	0.0661739	0.0444951	0.0522058	0.033245	0.0383122	0.0355152	0.0693695	0.0349697	0.0298603	0.0285804	0.0301124	0.0181033	0.0374053	0.0306845	0.0278914	0.017754
778.575	PE(O-)40:6	PE31:1	0.0297197	0.025305	0.029769	0.0318356	0.0303079	0.0227869	0.0270944	0.0220367	0.0208262	0.0163118	0.0389732	0.0206587	0.0195251	0.0301629	0.0367592	0.0236065	0.0345865	0.0135378	0.0263856	0.0267294	0.0187065	0.0187569	0.029646	0.0226246	0.0270863	0.0195138	0.0214518	0.028312	0.0181051	0.0244531	0.015165	0.0300789	0.0262102	0.0325974	0.0232988	0.0383121	0.0293831	0.04772	0.0308258	0.0199858	0.0233705	0.0255864	0.0167267	0.0184381	0.0258579	0.0226634	0.0145156
628.398	PE28:4	PE31:1	0.0140097	0.022574	0.0183258	0.0173768	0.0279649	0.0153988	0.018197	0.0169098	0.0139719	0.00898631	0.00704945	0.00893268	0.00428073	0.0115003	0.0112978	0.0134985	0.0114831	0.00912089	0.0163671	0.0207821	0.0115574	0.00715745	0.0125743	0.00999549	0.0146632	0.0115114	0.0058083	0.00697614	0.00570903	0.0107574	0.00997364	0.00642313	0.00611385	0.00743258	0.00633143	0.00320226	0.00890126	0.00691365	0.00566313	0.0136659	0.00592031	0.00806685	0.00909658	0.00923524	0.00684302	0.00703691	0.00731289
626.382	PE28:5	PE31:1	0.0240666	0.0482966	0.0286524	0.0230594	0.0476568	0.0222238	0.0322267	0.0338623	0.0248207	0.021346	0.0150157	0.0150774	0.00810555	0.0182006	0.0117091	0.0197509	0.0141064	0.010152	0.0181523	0.0366151	0.0252991	0.0111846	0.0137057	0.0159858	0.021134	0.0162969	0.00820477	0.0108315	0.0124896	0.0102832	0.0128457	0.00782775	0.0116346	0.012247	0.0066051	0.00555793	0.0109249	0.0108974	0.0110448	0.0156975	0.00794132	0.0112456	0.0116692	0.0128397	0.012168	0.0115124	0.0108873
624.367	PE28:6	PE31:1	0.035924	0.0705294	0.0424348	0.0305836	0.0734297	0.0219802	0.0518488	0.0472376	0.0463173	0.0317872	0.0278008	0.0383486	0.0106262	0.0281474	0.017965	0.0303688	0.0251286	0.0187151	0.0313425	0.0560287	0.0184816	0.0135383	0.0206739	0.0276831	0.0366739	0.0461523	0.0168233	0.0155188	0.0175477	0.0234243	0.0344893	0.0189297	0.0169125	0.0178334	0.0124005	0.00612947	0.0175567	0.0203664	0.0231835	0.0191972	0.0118535	0.0210306	0.0179658	0.0260795	0.0199154	0.0222142	0.0158918
662.476	PE30:1	PE31:1	0.00169724	0.00294456	0.00269598	0.00279599	0.00400594	0.00208673	0.00260343	0.00316493	0.00286071	0.00202217	0.00240424	0.00270053	0.00167964	0.00203957	0.00207392	0.00486423	0.00305235	0.00217372	0.00219395	0.00284858	0.00170486	0.00286255	0.0028907	0.001862	0.0021538	0.00231936	0.00169884	0.00229253	0.00171502	0.00272496	0.002986	0.0032089	0.00130384	0.00275579	0.00243646	0.00100371	0.0031513	0.00270899	0.00217903	0.00283281	0.00356498	0.00312369	0.00221183	0.00167674	0.00233555	0.00173953	0.00244591
658.445	PE30:3	PE31:1	0.00613664	0.00856134	0.00847188	0.00729101	0.00777591	0.00610611	0.0072205	0.0091665	0.00571372	0.00340676	0.00334213	0.00234587	0.000971003	0.00292744	0.00326187	0.00635739	0.00345016	0.00417018	0.00654049	0.00662988	0.00283283	0.0032572	0.00524861	0.00345764	0.00491864	0.00342616	0.0021825	0.00214389	0.00276717	0.00310158	0.00403189	0.001268	0.00179394	0.00422128	0.00224839	0.000818962	0.0029291	0.00335246	0.00219998	0.00642118	0.00346636	0.00360428	0.00434966	0.00279315	0.00196826	0.00362933	0.00388527
692.523	PE32:0	PE31:1	0.00172254	0.00250407	0.00434471	0.00230499	0.00292669	0.00263013	0.00252053	0.00377219	0.0021435	0.00177401	0.00195329	0.00179407	0.00272613	0.00149719	0.00175909	0.00457893	0.00498772	0.00167435	0.00129613	0.00185284	0.00325067	0.00586962	0.00257181	0.00325107	0.00203647	0.00180753	0.00160012	0.00205652	0.000639436	0.00224518	0.00258649	0.00365997	0.00214515	0.00306245	0.00224677	0.00337687	0.00301376	0.00352469	0.00318957	0.00278884	0.00492497	0.00348871	0.00196984	0.00164223	0.00301156	0.00144528	0.00448663
690.507	PE32:1	PE31:1	0.00416265	0.00396879	0.00945499	0.00438453	0.00672603	0.0101548	0.00750686	0.0108551	0.0031047	0.00446592	0.00439485	0.0052276	0.0119553	0.00239419	0.00351551	0.0168695	0.0301853	0.00494093	0.00280066	0.00656347	0.0182262	0.0243177	0.00500543	0.0104385	0.00591193	0.00465767	0.00548614	0.00490471	0.00415189	0.00799672	0.00528569	0.00516393	0.0094752	0.0133075	0.00671146	0.0191353	0.0111625	0.00483597	0.0136283	0.00418593	0.0215576	0.0112577	0.00410326	0.00543707	0.0150132	0.00468065	0.0249684
688.492	PE32:2	PE31:1	0.00128726	0.00240182	0.00236606	0.00230885	0.00193527	0.00217254	0.00141078	0.00286634	0.0016273	0.0011829	0.0015456	0.00156166	0.000908487	0.00111621	0.00119247	0.00298514	0.00455836	0.00102869	0.00141579	0.00202348	0.00222513	0.00307525	0.0013108	0.0014246	0.00152918	0.00161779	0.000833967	0.00186385	0.000926269	0.002103	0.00159263	0.00147918	0.00113077	0.00252004	0.00136723	0.00181331	0.00128058	0.00109678	0.00153806	0.0019505	0.00341713	0.00290396	0.00115391	0.00117272	0.00174775	0.00121682	0.00275677
686.476	PE32:3	PE31:1	0.0024148	0.0038231	0.00283638	0.00278559	0.00383702	0.00238472	0.00256773	0.00336937	0.00182168	0.00122681	0.00097119	0.00176412	0.00063082	0.00139285	0.00130512	0.00239048	0.00162246	0.00129498	0.00259648	0.00263722	0.00163824	0.00126825	0.00247987	0.00171858	0.00205401	0.00146876	0.000627901	0.00125483	0.000508866	0.00154514	0.00124122	0.000741442	0.000984603	0.00169816	0.000983794	0.00126707	0.00246533	0.000856042	0.00129895	0.00265654	0.00181233	0.00180784	0.00194073	0.00123523	0.000617433	0.00143431	0.00268506
684.46	PE32:4	PE31:1	0.0025595	0.00710175	0.00428259	0.00359561	0.00621122	0.00316251	0.0049074	0.00602548	0.00313014	0.0025263	0.00190352	0.00180615	0.000739891	0.00233751	0.00139492	0.0028277	0.00163677	0.00188481	0.00290967	0.00397764	0.00265376	0.00111254	0.00231577	0.00174959	0.00247634	0.00139806	0.00119338	0.00139765	0.00276895	0.00157452	0.00301117	0.0013458	0.00145559	0.00164826	0.000914889	0.000544397	0.00138461	0.000948562	0.00121998	0.00242427	0.00215991	0.00191072	0.00193099	0.00122418	0.00121954	0.00226854	0.00220843
682.445	PE32:5	PE31:1	0.00482882	0.00878464	0.00633202	0.00459542	0.00482766	0.00315762	0.00611036	0.00507784	0.00467362	0.00343893	0.00249458	0.00333109	0.00110917	0.00199964	0.00166463	0.00457419	0.00165759	0.00217759	0.00374084	0.00658334	0.00202565	0.00193948	0.00195809	0.00255954	0.00363267	0.00335773	0.00150116	0.00146918	0.00137518	0.00153487	0.00437258	0.00148474	0.00126239	0.0022372	0.00143629	0.000552413	0.00225008	0.0014579	0.00178895	0.00267427	0.00260114	0.0034844	0.00233087	0.00201881	0.001367	0.00258716	0.00277826
720.554	PE34:0	PE31:1	0.00218669	0.00393048	0.00732236	0.00309718	0.00542536	0.00607493	0.00648516	0.00840315	0.00275828	0.00390239	0.00395922	0.00510826	0.00816042	0.00282056	0.00372078	0.0116793	0.011097	0.00297462	0.00303535	0.00559342	0.00912082	0.0156943	0.0045644	0.00828707	0.00451114	0.0055555	0.00643859	0.00425283	0.00302249	0.0055997	0.00414069	0.00528226	0.00974047	0.01034	0.00716736	0.014964	0.0115858	0.00381986	0.0136214	0.00420423	0.016416	0.0120043	0.00688582	0.00830227	0.00918402	0.00540623	0.0115347
718.539	PE34:1	PE31:1	0.0263739	0.0345048	0.0650033	0.0300623	0.0531378	0.0606983	0.0704864	0.0940756	0.0260175	0.0400742	0.0366103	0.0531129	0.102998	0.027977	0.026301	0.107858	0.141715	0.0354055	0.0340269	0.0580028	0.138429	0.151384	0.0476196	0.107522	0.0552259	0.0654178	0.0706423	0.0418759	0.0336105	0.0684218	0.0415171	0.0582563	0.115087	0.106426	0.0784113	0.166286	0.102135	0.0464069	0.156143	0.0368216	0.186819	0.117797	0.0756066	0.0932317	0.100761	0.0441712	0.131682
716.523	PE34:2	PE31:1	0.0571274	0.0842837	0.123368	0.0542074	0.0822604	0.105738	0.12193	0.0992444	0.0434549	0.0926971	0.0808648	0.0821307	0.140394	0.0635509	0.0494129	0.161915	0.294159	0.0711397	0.0569008	0.0765913	0.147212	0.316864	0.102555	0.161035	0.11323	0.150258	0.113005	0.0630802	0.0350807	0.160087	0.0683376	0.112575	0.134456	0.225916	0.122268	0.331291	0.156818	0.136652	0.195561	0.0489745	0.358758	0.162654	0.168071	0.175575	0.177909	0.0790787	0.281853
714.507	PE34:3	PE31:1	0.00438523	0.00595184	0.00732351	0.0050683	0.00797861	0.0107989	0.0083481	0.00885557	0.00363181	0.00518826	0.00676502	0.00659551	0.00890397	0.00377423	0.00367228	0.0139629	0.0287638	0.00524267	0.00385949	0.00792231	0.0113941	0.0243667	0.00637218	0.0118541	0.00732379	0.0100602	0.00486375	0.00585201	0.00359681	0.00926715	0.00565954	0.00601305	0.00927016	0.0155702	0.00733597	0.0191029	0.00923493	0.00932939	0.0125057	0.00505272	0.0227303	0.0130774	0.00961372	0.00648931	0.014276	0.00564849	0.0180001
712.492	PE34:4	PE31:1	0.00183324	0.00132415	0.00335004	0.00210093	0.00284535	0.00197056	0.00212312	0.00218356	0.00199104	0.00120179	0.00188898	0.00153798	0.00189179	0.00142962	0.000981128	0.00298751	0.00326118	0.00127562	0.00100743	0.00215001	0.00355028	0.00255823	0.00221954	0.00215428	0.00186571	0.00137544	0.000978093	0.0021341	0.000772268	0.00164767	0.00124037	0.00163154	0.00144696	0.00187756	0.00150228	0.00135805	0.00270466	0.00181645	0.00221612	0.00218887	0.00265235	0.00272597	0.00132712	0.00102499	0.00225143	0.00166439	0.00349543
710.476	PE34:5	PE31:1	0.00094054	0.00172144	0.00153115	0.00151339	0.000889804	0.00126492	0.000762704	0.00141039	0.000674014	0.000622258	0.00103206	0.00063829	0.000635808	0.000479877	0.000766968	0.0015563	0.00110365	0.000486127	0.000712713	0.00123159	0.000907884	0.000583693	0.000855592	0.000763896	0.000810414	0.000542938	0.000528223	0.000933321	0.00108641	0.000954824	0.000919738	0.00112536	0.00163898	0.00104053	0.00100601	0.000673422	0.000936478	0.00115185	0.000696819	0.0013655	0.00105418	0.00186165	0.000805232	0.00114154	0.000648083	0.000836664	0.000933157
748.586	PE36:0	PE31:1	0.0198518	0.0116211	0.0205321	0.0177154	0.0170656	0.0148364	0.018579	0.0143357	0.0131197	0.00825087	0.0167868	0.0150001	0.0134095	0.016083	0.0192289	0.018397	0.0202023	0.00993198	0.014702	0.0205014	0.0210587	0.0121431	0.0187227	0.0192872	0.0180686	0.00986054	0.0189257	0.0133104	0.0119159	0.0103779	0.0101887	0.0254594	0.0224691	0.0276919	0.0210047	0.0244859	0.0184972	0.0247394	0.0251296	0.0112156	0.0189078	0.0178998	0.0139282	0.0257511	0.0188154	0.0137373	0.0147134
746.57	PE36:1	PE31:1	0.0377445	0.0525136	0.0831772	0.0388504	0.0767732	0.0642022	0.0844257	0.0756309	0.0490871	0.0449062	0.0491195	0.0664793	0.10692	0.0595621	0.0411737	0.09583	0.112317	0.0421512	0.0439573	0.0859543	0.130151	0.133394	0.100357	0.133744	0.0680598	0.0744354	0.100558	0.0428079	0.0368932	0.0632035	0.0549715	0.0974633	0.166338	0.131491	0.0821828	0.27257	0.117594	0.0591611	0.209985	0.0383028	0.183461	0.117388	0.124477	0.217196	0.110768	0.0627199	0.133786
744.554	PE36:2	PE31:1	0.17206	0.225538	0.367193	0.141418	0.256994	0.273628	0.293389	0.208273	0.132741	0.20067	0.193183	0.223843	0.393099	0.253329	0.157171	0.351122	0.561719	0.1608	0.180913	0.280459	0.427557	0.634617	0.393151	0.458659	0.29775	0.337585	0.361552	0.145445	0.110634	0.303121	0.203415	0.339866	0.409901	0.54007	0.30005	1.01409	0.475677	0.231461	0.710643	0.119421	0.724715	0.35784	0.500107	0.641541	0.425026	0.208461	0.58001
742.539	PE36:3	PE31:1	0.0676651	0.133751	0.128536	0.0602357	0.103906	0.0951875	0.105818	0.0920137	0.0478777	0.104366	0.0731973	0.0960827	0.126086	0.106216	0.0460887	0.173594	0.2256	0.0556307	0.0560923	0.113929	0.14987	0.206994	0.119597	0.176047	0.116782	0.151682	0.0939429	0.0785434	0.0321075	0.120759	0.0730959	0.124268	0.140612	0.193057	0.103466	0.350756	0.156954	0.106265	0.322067	0.0459488	0.233968	0.135806	0.14727	0.220834	0.160502	0.0781756	0.21577
740.523	PE36:4	PE31:1	0.0781636	0.122159	0.108318	0.0733753	0.14238	0.127335	0.113272	0.142118	0.0550726	0.104891	0.126226	0.115277	0.188186	0.0937337	0.0806675	0.214425	0.294318	0.0688112	0.0666103	0.110512	0.169852	0.276535	0.106051	0.186274	0.0991213	0.12497	0.0959962	0.12098	0.0541549	0.157556	0.0913346	0.107889	0.165153	0.230618	0.151593	0.268816	0.239826	0.167791	0.205918	0.0919372	0.263075	0.197802	0.165209	0.136143	0.206536	0.0813345	0.21072
738.507	PE36:5	PE31:1	0.0160651	0.0136949	0.0156197	0.0105528	0.0201108	0.0370678	0.0233259	0.021189	0.00730467	0.0110502	0.0189309	0.013106	0.0238614	0.0124836	0.0134919	0.0263821	0.0453966	0.0080596	0.00925442	0.0160138	0.019794	0.03332	0.0109308	0.0192957	0.013324	0.0118722	0.013365	0.0130315	0.0065524	0.0124398	0.0100937	0.0121122	0.0173133	0.0380672	0.0174495	0.0388167	0.0209799	0.034218	0.0223109	0.0101143	0.031008	0.0205182	0.0130085	0.0104252	0.0288518	0.0152657	0.0232692
736.492	PE36:6	PE31:1	0.00320037	0.00177464	0.00332982	0.00274044	0.0042944	0.00354488	0.00375621	0.00306448	0.00139807	0.00209757	0.00328528	0.00210573	0.00269354	0.00209092	0.00236238	0.00367372	0.00520175	0.00122693	0.00140696	0.00244864	0.00253014	0.00256081	0.00196872	0.00282984	0.00334813	0.00162372	0.00194061	0.00260263	0.00109287	0.00223861	0.00125805	0.00216065	0.00192201	0.00497814	0.0019183	0.00227619	0.0035324	0.00353494	0.00274583	0.00202331	0.00345012	0.00399426	0.00181361	0.00100471	0.00280876	0.00214608	0.00310169
776.617	PE38:0	PE31:1	0.0302009	0.0213575	0.0301804	0.0265148	0.0221552	0.0136806	0.0173865	0.0126758	0.0136295	0.0107333	0.0273952	0.0125049	0.0104918	0.0240655	0.0270589	0.0173213	0.019005	0.0101492	0.022225	0.0219417	0.0162661	0.0120156	0.0225499	0.0148353	0.0209464	0.0121236	0.019771	0.0227685	0.0145079	0.0128756	0.0101549	0.0253582	0.0180741	0.0202172	0.0238802	0.0205506	0.0154889	0.030644	0.0184699	0.0166543	0.0144021	0.0148209	0.0102737	0.0200836	0.0158368	0.0152854	0.00828818
774.601	PE38:1	PE31:1	0.0155567	0.0135766	0.017564	0.0152245	0.0124729	0.0087395	0.0118693	0.00981328	0.0098628	0.00797344	0.0146467	0.00857367	0.00630587	0.012945	0.0157516	0.0135924	0.0113302	0.00830083	0.0111284	0.0122662	0.0143409	0.00826311	0.0138894	0.00909814	0.01107	0.0079317	0.0136971	0.0128163	0.0103019	0.00846212	0.00951224	0.0188873	0.0126772	0.0139084	0.0149103	0.0150034	0.0142498	0.0145943	0.0130341	0.011856	0.0120664	0.0130143	0.00849414	0.0140103	0.00942428	0.0105793	0.00948281
772.586	PE38:2	PE31:1	0.0111528	0.0127576	0.0154331	0.0136446	0.0136477	0.0135065	0.0130976	0.0126064	0.00945095	0.0110505	0.0132483	0.00957774	0.0157785	0.0107982	0.0133469	0.0190836	0.0226022	0.0122449	0.0123297	0.0134474	0.0236246	0.0159077	0.0186265	0.0170572	0.0143415	0.0140355	0.016271	0.0145911	0.00958152	0.0141204	0.0100865	0.0166341	0.0162921	0.019355	0.01499	0.025172	0.0183219	0.0157436	0.024993	0.0131561	0.024539	0.0167574	0.0160271	0.0163366	0.0135592	0.0122015	0.0220428
770.57	PE38:3	PE31:1	0.0382601	0.0569243	0.0679368	0.0447991	0.0557014	0.0727086	0.0726936	0.0579399	0.0355822	0.0486251	0.050186	0.0574123	0.103476	0.0537401	0.0597669	0.123589	0.124508	0.0499891	0.0485135	0.0641251	0.130438	0.113013	0.0769607	0.0982082	0.0748527	0.0604861	0.0791598	0.0681438	0.0372813	0.0952662	0.053295	0.0593436	0.0854003	0.100595	0.0985434	0.241068	0.118956	0.0880795	0.137486	0.0608112	0.159864	0.102668	0.105699	0.0833308	0.0956054	0.0538474	0.148201
768.554	PE38:4	PE31:1	0.17335	0.288749	0.259602	0.19863	0.245736	0.25719	0.284802	0.352256	0.134222	0.215162	0.274559	0.261783	0.433583	0.242355	0.271628	0.523355	0.487824	0.165581	0.181308	0.300242	0.440492	0.462698	0.289101	0.444905	0.206641	0.250994	0.297842	0.355555	0.159967	0.378422	0.248942	0.271209	0.409949	0.439315	0.392022	0.826243	0.526914	0.412823	0.607088	0.261257	0.518374	0.456043	0.400747	0.40627	0.421242	0.199408	0.407455
766.539	PE38:5	PE31:1	0.0988769	0.134292	0.145375	0.0901251	0.148326	0.17984	0.162925	0.191386	0.0538499	0.11873	0.148806	0.120496	0.192825	0.143998	0.119295	0.243203	0.299555	0.0680956	0.0778832	0.129848	0.197658	0.216676	0.129159	0.175346	0.107099	0.116329	0.118632	0.175873	0.0590364	0.186622	0.0956793	0.0951221	0.196808	0.256112	0.228142	0.380636	0.231059	0.202673	0.312027	0.105094	0.251158	0.214496	0.161584	0.132355	0.227498	0.109447	0.200952
764.523	PE38:6	PE31:1	0.219075	0.213109	0.266692	0.180336	0.200266	0.270371	0.254854	0.267977	0.0735314	0.105983	0.371718	0.179917	0.320624	0.232114	0.253235	0.355326	0.570612	0.135804	0.120389	0.238639	0.306543	0.291136	0.248975	0.324191	0.207351	0.155184	0.232353	0.266317	0.0951321	0.236948	0.109738	0.145312	0.312896	0.562665	0.604306	0.555683	0.485815	0.46578	0.395658	0.176672	0.420559	0.339583	0.287306	0.154535	0.355088	0.186699	0.366255
804.648	PE40:0	PE31:1	0.00231162	0.00354978	0.00262895	0.00306896	0.00231053	0.00125065	0.0015734	0.00164226	0.00139464	0.00096981	0.00247027	0.00196657	0.0011795	0.00182201	0.00293013	0.00259252	0.00197115	0.00103928	0.00137564	0.00189768	0.00212154	0.00157817	0.00246234	0.00172741	0.00174629	0.00114639	0.00127449	0.00245515	0.00131572	0.0012807	0.00107988	0.00188116	0.00151988	0.00229971	0.00238166	0.00103742	0.002226	0.00432375	0.00203068	0.00227719	0.00247019	0.00176006	0.00136811	0.00162558	0.00154699	0.00182076	0.0017692
802.633	PE40:1	PE31:1	0.00140824	0.00208262	0.00217192	0.00230677	0.00085888	0.00161407	0.00116428	0.00144312	0.00139122	0.000870412	0.00172284	0.001279	0.000863594	0.00128812	0.0024543	0.0013227	0.00290078	0.000812113	0.00123751	0.00102944	0.00111988	0.00136525	0.00215371	0.00189658	0.000994542	0.000684045	0.00110101	0.00158147	0.00153807	0.00121926	0.000835245	0.00136942	0.0013639	0.0014184	0.00167089	0.001365	0.00180865	0.00243367	0.00123132	0.00163417	0.00187647	0.00155302	0.000917855	0.00120481	0.00121562	0.00147269	0.00186966
800.617	PE40:2	PE31:1	0.00173322	0.00302583	0.00251628	0.00206974	0.00256572	0.00114202	0.00180046	0.0025471	0.0010138	0.00106223	0.00270685	0.00113017	0.000651437	0.00189745	0.00313287	0.00293029	0.00303479	0.000911742	0.00140093	0.00198009	0.00170678	0.00221412	0.0026533	0.0020009	0.00160747	0.00142832	0.00178798	0.00138344	0.00158235	0.00106681	0.00131109	0.00186379	0.00172373	0.00271879	0.00209275	0.00171663	0.00188264	0.00255788	0.00172176	0.00158908	0.00247135	0.00200735	0.00186149	0.00398797	0.00149539	0.001731	0.00159005
798.601	PE40:3	PE31:1	0.00501582	0.00347559	0.00405928	0.00493137	0.00421436	0.0030769	0.004415	0.00263245	0.0024448	0.00275369	0.00527685	0.00290347	0.00266427	0.00399433	0.00398119	0.00432875	0.00354839	0.00217372	0.00454249	0.00334354	0.00426195	0.0045233	0.00387963	0.00501269	0.00299699	0.00254248	0.00502117	0.00288151	0.00205469	0.00339007	0.00289556	0.00518477	0.00349027	0.00486096	0.00331033	0.00607268	0.00413247	0.00425332	0.00618803	0.003435	0.0044438	0.00457061	0.00332927	0.00546855	0.00369625	0.00324694	0.00335116
796.586	PE40:4	PE31:1	0.0112133	0.00989574	0.0129079	0.0105186	0.0114705	0.0146216	0.0108569	0.0154427	0.00721507	0.0085603	0.0116007	0.0118593	0.0194387	0.00864222	0.00973091	0.022369	0.0310173	0.00959071	0.00936284	0.013754	0.0190727	0.0258507	0.0146788	0.0198335	0.0114174	0.00862084	0.0165098	0.0116066	0.00634297	0.019313	0.0103361	0.0137329	0.0197398	0.0165516	0.0138668	0.0341995	0.0202065	0.00997927	0.0369052	0.0130985	0.0230895	0.0191095	0.0213667	0.0172254	0.0185152	0.00755231	0.0179161
794.57	PE40:5	PE31:1	0.0313458	0.0341224	0.0473431	0.0358031	0.0323484	0.0599833	0.048421	0.0581476	0.0204199	0.0271419	0.046054	0.0411279	0.0752674	0.0332888	0.0450294	0.0768608	0.0946627	0.0259259	0.0259307	0.0532938	0.0745262	0.0752403	0.0518597	0.0678677	0.0384671	0.0333635	0.0581117	0.044907	0.0221993	0.0663509	0.0372057	0.0385177	0.0715834	0.0889839	0.069836	0.128603	0.0997265	0.0598493	0.126571	0.0386331	0.0973815	0.0768975	0.0757835	0.0618871	0.0728651	0.0355911	0.0662084
792.554	PE40:6	PE31:1	0.126735	0.0894131	0.150569	0.114133	0.0840556	0.160366	0.149202	0.153828	0.0573342	0.0482248	0.184198	0.118117	0.211616	0.128595	0.182118	0.234717	0.333576	0.0908568	0.0744594	0.203136	0.194923	0.147352	0.192541	0.231977	0.135861	0.0855959	0.239733	0.133191	0.0716192	0.151361	0.0838931	0.110207	0.228033	0.33887	0.328428	0.346203	0.380719	0.272118	0.285767	0.125042	0.270984	0.227424	0.236517	0.135956	0.212626	0.126681	0.190393
832.679	PE42:0	PE31:1	0.000696608	0.000910262	0.0014335	0.000852193	0.000870054	0.00141595	0.000602072	0.00143204	0.000789486	0.000651873	0.000698055	0.000678878	0.000681864	0.00136977	0.000878771	0.00275588	0.0053735	0.000442119	0.000878945	0.00148392	0.000480226	0.000736606	0.000935034	0.00140975	0.000729832	0.000612785	0.000498391	0.00105447	0.000759986	0.00130145	0.000556773	0.000877597	0.000754017	0.000973538	0.00135539	0.000458542	0.000869445	0.00133497	0.000927638	0.00065374	0.00140027	0.000979679	0.000564779	0.000836554	0.00074957	0.00193712	0.00143099
822.601	PE42:5	PE31:1	0.00141417	0.000967611	0.000982824	0.00109131	0.00162213	0.0021061	0.000952686	0.0010136	0.000817712	0.00089424	0.00116757	0.000577892	0.000897513	0.00109579	0.00176727	0.00213636	0.00336104	0.000866919	0.00107208	0.00153191	0.00058998	0.000823924	0.00137029	0.0012652	0.000662402	0.000870397	0.000718354	0.00131215	0.000617943	0.00113584	0.000882677	0.00132774	0.000805277	0.00166676	0.00065824	0.000524986	0.000946409	0.00159876	0.00123525	0.000750194	0.00143176	0.00122072	0.000914648	0.00137811	0.00103496	0.000929265	0.00130123
820.586	PE42:6	PE31:1	0.0010544	0.00236985	0.00184489	0.00144745	0.00254987	0.00122722	0.00119145	0.00103173	0.000713788	0.00100589	0.00187692	0.000914673	0.0013737	0.00205846	0.00181732	0.00286637	0.00670061	0.000937006	0.00120499	0.00157045	0.00174414	0.00141514	0.00174941	0.00219376	0.00119704	0.00144642	0.00124813	0.00196123	0.00100674	0.0017276	0.000874176	0.000968367	0.00140145	0.00167881	0.00113036	0.00199651	0.00160383	0.00176299	0.00215591	0.000820039	0.0020041	0.00211733	0.00128436	0.00114351	0.00141264	0.00127104	0.00161516
468.309	LysoPC14:0	DLPC	0.00669245	0.0106424	0.0180171	0.0170903	0.0144763	0.0178428	0.018003	0.0276564	0.0115429	0.0148453	0.00941346	0.0100479	0.0129681	0.0074064	0.0122558	0.0188724	0.0212199	0.00942904	0.00919158	0.018001	0.0150116	0.00752274	0.00995129	0.0111967	0.0112905	0.010535	0.00759428	0.00880492	0.0112196	0.0106821	0.0106053	0.00806544	0.014072	0.0189743	0.00572426	0.00706558	0.0129005	0.00796129	0.00952258	0.0130174	0.00742276	0.0132771	0.00802935	0.00545367	0.0107666	0.00992167	0.00717215
496.34	LysoPC16:0	DLPC	1.10946	1.27891	1.79609	1.22293	1.77402	0.998026	1.89031	1.75593	1.6037	1.4464	0.996062	0.996926	1.18797	1.36427	1.08148	1.40893	1.5456	0.795845	1.11612	1.06432	0.891027	0.900583	0.854368	1.12149	0.893075	1.11718	0.585651	0.879465	0.755476	1.01116	0.56698	0.892623	0.93716	1.05035	0.613968	0.530998	0.744439	1.17138	0.883986	1.42074	0.652246	0.691668	0.809727	0.851426	0.762525	0.786555	0.55123
494.325	LysoPC16:1	DLPC	0.0293234	0.0235959	0.0380873	0.0344389	0.0374404	0.0320311	0.0450837	0.0846377	0.0382246	0.0345649	0.0209504	0.0258284	0.0451694	0.021898	0.022167	0.0444993	0.0636054	0.0173795	0.0145511	0.0239982	0.0649568	0.0260567	0.0182803	0.0255675	0.0251564	0.0217463	0.0159411	0.0308515	0.0244021	0.0330743	0.0181542	0.0188976	0.0233546	0.0300513	0.0189143	0.0187866	0.0180345	0.0289952	0.0462129	0.0385678	0.016929	0.0224415	0.0132926	0.0202509	0.0286383	0.0192588	0.0190696
524.372	LysoPC18:0	DLPC	0.319294	0.313645	0.387554	0.317289	0.508264	0.253923	0.38599	0.32656	0.345785	0.352081	0.229344	0.241992	0.270327	0.457861	0.363322	0.26997	0.311316	0.239196	0.331456	0.328959	0.237575	0.146874	0.187815	0.228381	0.25883	0.33308	0.158936	0.207784	0.186957	0.248873	0.13622	0.230667	0.205254	0.211745	0.136754	0.143503	0.180843	0.184176	0.238592	0.425322	0.135168	0.17673	0.212773	0.181954	0.173662	0.183667	0.128896
522.356	LysoPC18:1	DLPC	0.364724	0.7124	0.508008	0.307078	0.792892	0.252668	0.587772	0.65133	0.57412	0.478635	0.305391	0.374319	0.346482	0.527969	0.280044	0.415163	0.39919	0.201815	0.277967	0.4187	0.338428	0.208176	0.198791	0.296573	0.256571	0.332536	0.162537	0.289993	0.247563	0.206589	0.186146	0.235257	0.368704	0.227784	0.177703	0.173261	0.204078	0.26601	0.500198	0.368736	0.134763	0.226776	0.187755	0.268793	0.235996	0.213957	0.14845
520.659	LysoPC18:2	DLPC	0.396017	0.748984	0.657104	0.288826	0.774546	0.178883	0.566211	0.496539	0.561068	0.41887	0.344181	0.475118	0.144451	0.410023	0.254916	0.362477	0.369579	0.213106	0.324711	0.473471	0.2167	0.151321	0.184645	0.26838	0.233511	0.578491	0.186472	0.220682	0.216784	0.233028	0.239853	0.41155	0.33963	0.25209	0.202598	0.197905	0.174332	0.36196	0.399251	0.201887	0.0795201	0.237936	0.194859	0.25185	0.252888	0.22211	0.111762
552.403	LysoPC20:0	DLPC	0.00121407	0.00193132	0.00123221	0.0010319	0.00144483	0.000542983	0.0009275	0.00120941	0.00126075	0.00124701	0.000762111	0.000668409	0.000624335	0.00178638	0.00120955	0.000875418	0.00122807	0.000670513	0.00105732	0.000955324	0.000483499	0.000431963	0.000695821	0.000945941	0.000787207	0.00105489	0.000521953	0.000670208	0.000515357	0.000590729	0.000425018	0.000946138	0.000541532	0.0005319	0.000429477	0.000507023	0.000573878	0.000782251	0.000534722	0.00114423	0.00049905	0.000610506	0.000596083	0.000767383	0.000543475	0.000684866	0.000360445
550.387	LysoPC20:1	DLPC	0.00324015	0.00471683	0.00295606	0.00259645	0.00343285	0.00119817	0.00229585	0.00278817	0.00232173	0.00271529	0.00153188	0.00185302	0.00151775	0.00339886	0.00242474	0.00190355	0.00176379	0.00172869	0.00245103	0.00264528	0.00166553	0.00136218	0.00167542	0.00207045	0.00149891	0.00241153	0.00089974	0.00180987	0.00110639	0.00151295	0.0011348	0.00195671	0.00138606	0.0014868	0.00184984	0.00142589	0.00134253	0.00202886	0.0023408	0.00220208	0.000900859	0.001301	0.00117148	0.00130104	0.0012131	0.00166402	0.000749725
548.372	LysoPC20:2	DLPC	0.00422057	0.00673637	0.00605685	0.00409797	0.00733212	0.00324903	0.0056825	0.00504839	0.00554069	0.0047109	0.00346316	0.00305898	0.00351767	0.0042255	0.00325938	0.00462628	0.00596639	0.00384872	0.00439463	0.00569722	0.00464898	0.00358507	0.00319196	0.00338747	0.00288126	0.00385076	0.00232762	0.00347801	0.00270727	0.00282865	0.00239908	0.00447245	0.00357388	0.00217743	0.00211893	0.0029316	0.00282656	0.00341281	0.00532661	0.00443249	0.00147961	0.00245996	0.00199625	0.0020321	0.00271354	0.00182496	0.00213104
692.559	PC(O-)30:0	DLPC	0.00480603	0.00638257	0.00628955	0.00762095	0.00632875	0.00864156	0.00627059	0.00663092	0.00662378	0.00911771	0.00789738	0.00608131	0.00236017	0.00561093	0.00618639	0.00705721	0.00842105	0.00648768	0.00581754	0.00564578	0.00375549	0.00469466	0.00389016	0.00629484	0.00487111	0.00477851	0.00444868	0.00666364	0.00597044	0.0075913	0.00738737	0.00731798	0.00673616	0.00653333	0.00374589	0.00536662	0.00742988	0.00514394	0.00564011	0.00471258	0.00582312	0.00753286	0.00341562	0.00363309	0.00437362	0.00694478	0.0065194
690.544	PC(O-)30:1	DLPC	0.0176992	0.0273615	0.0228706	0.0296965	0.0201512	0.0242137	0.0268788	0.023358	0.0276685	0.0298837	0.0266506	0.0318771	0.0117005	0.027934	0.0295098	0.0204131	0.0288925	0.0249347	0.0250036	0.0229885	0.012219	0.0177118	0.027771	0.0169608	0.0241948	0.0224942	0.0155531	0.0289541	0.0270816	0.0298099	0.0232415	0.0311619	0.031607	0.0215176	0.0170266	0.0168143	0.0253873	0.0277423	0.0250695	0.0337159	0.0284544	0.0298838	0.0122104	0.00989475	0.0170193	0.0273816	0.0215169
688.528	PC(O-)30:2	DLPC	0.00107812	0.00196499	0.00133708	0.00160176	0.000879604	0.000994858	0.00107891	0.00161916	0.00107649	0.000755696	0.00109388	0.0011226	0.0006508	0.00134602	0.00167939	0.00205241	0.00144177	0.00168835	0.000955537	0.00104895	0.000676436	0.000942964	0.00190872	0.000815461	0.00130807	0.00113159	0.000577563	0.0014736	0.000891741	0.00129447	0.00102033	0.00160173	0.00122428	0.00106821	0.000986388	0.00103664	0.00104553	0.00130183	0.00139866	0.00138459	0.00111523	0.00124343	0.000823092	0.000571375	0.000662954	0.000987446	0.000712751
686.512	PC(O-)30:3	DLPC	0.000808591	0.000925941	0.000715018	0.000709319	0.00061317	0.00053534	0.000533357	0.000771155	0.000833607	0.000860653	0.000916831	0.000850409	0.000662577	0.00105717	0.00118699	0.000923362	0.000906046	0.000608168	0.00053604	0.000493024	0.000421401	0.000428415	0.00070687	0.000667281	0.000997883	0.000639908	0.000670213	0.000914061	0.000715601	0.000616413	0.00075129	0.000977745	0.000769158	0.000643746	0.00114762	0.000369619	0.000564941	0.0006622	0.000619643	0.00107402	0.0008492	0.00105637	0.000645485	0.000571123	0.000693888	0.000994384	0.000736238
684.497	PC(O-)30:4	DLPC	0.000799993	0.000506623	0.000383076	0.000451121	0.000463093	0.00050125	0.000317694	0.000439203	0.000847329	0.00142175	0.000849679	0.00135534	0.00110596	0.000363341	0.000533283	0.000604329	0.000652821	0.000426481	0.000451117	0.000366495	0.000468191	0.000388735	0.000630085	0.000354317	0.00283412	0.000409324	0.00122891	0.000882026	0.000615277	0.00119721	0.00149025	0.00133064	0.00133898	0.00167412	0.00153272	0.000427637	0.00143153	0.000692453	0.00101349	0.00108248	0.00187921	0.00100741	0.000702707	0.000593196	0.000788961	0.00170294	0.000857859
680.465	PC(O-)30:6	DLPC	0.00113461	0.0024546	0.0019663	0.00176884	0.000981929	0.00134003	0.00163279	0.00304214	0.0010952	0.00101157	0.0010312	0.000526271	0.000617685	0.0011924	0.00118018	0.00348599	0.00237075	0.00175177	0.000834777	0.00126237	0.0010782	0.00161688	0.00132828	0.00285098	0.000998057	0.000862833	0.000828356	0.000715445	0.000655272	0.00103112	0.00171084	0.00176671	0.00162358	0.00186312	0.00148189	0.00127277	0.00165386	0.00125597	0.00123176	0.000901865	0.000885665	0.00111914	0.000983869	0.000771419	0.000840329	0.000896909	0.00152689
720.591	PC(O-)32:0	DLPC	0.0442706	0.0527188	0.0682835	0.0663403	0.0566155	0.096784	0.0656258	0.0559477	0.0630079	0.091975	0.0686567	0.0655898	0.0347677	0.0470862	0.0456619	0.0532277	0.0673918	0.0695629	0.0664627	0.0643225	0.037095	0.0482253	0.0412337	0.0499731	0.0444011	0.0535911	0.0434045	0.0761606	0.0645716	0.063441	0.0748975	0.0483031	0.0592151	0.0724326	0.0434947	0.0536243	0.0665676	0.0422598	0.0469849	0.0536757	0.0703036	0.0666902	0.0432414	0.032253	0.0429335	0.0650575	0.0552394
718.575	PC(O-)32:1	DLPC	0.0617031	0.0520374	0.070512	0.0783038	0.0607005	0.0732945	0.0698424	0.0607156	0.0757266	0.0847843	0.0882585	0.0808698	0.0406419	0.055128	0.0652487	0.0640713	0.0899983	0.0609946	0.0594381	0.0600736	0.0548641	0.0493096	0.0480991	0.0614942	0.0570623	0.058766	0.0529609	0.0877056	0.0748149	0.0653581	0.0770186	0.0638662	0.0624722	0.0706628	0.0621884	0.0421969	0.0605559	0.0824759	0.0540459	0.0685386	0.074932	0.0652457	0.0364171	0.0431652	0.0514989	0.062357	0.0584004
716.559	PC(O-)32:2	DLPC	0.0113009	0.010228	0.00915634	0.0114908	0.0112735	0.00960004	0.00859975	0.00769343	0.0104322	0.0106824	0.0123906	0.0092474	0.00457513	0.00843947	0.0116583	0.00935496	0.0117827	0.00962464	0.00777981	0.00950998	0.00797239	0.0069848	0.00696157	0.00931969	0.00879758	0.00848046	0.00703419	0.012826	0.00972081	0.00837705	0.008491	0.00830945	0.00863418	0.00790807	0.00996675	0.00503734	0.00638491	0.0159567	0.00729729	0.00984891	0.00768755	0.00664077	0.00436633	0.00541608	0.0082401	0.0068358	0.00752818
714.544	PC(O-)32:3	DLPC	0.0013014	0.00198458	0.00177151	0.00125601	0.00179254	0.00116026	0.00101852	0.00203287	0.00115151	0.00105865	0.00138338	0.000821418	0.000585678	0.00123012	0.00225567	0.00263188	0.00171988	0.00143958	0.00122115	0.00113148	0.000745466	0.00156816	0.00133737	0.00200592	0.00113671	0.000869195	0.000908526	0.00111365	0.00131485	0.000871368	0.00113522	0.00165939	0.00173067	0.00136339	0.00237574	0.00113805	0.00102561	0.00316262	0.0017727	0.00115732	0.000653751	0.000976737	0.000771017	0.000926056	0.000989181	0.000930077	0.000735307
708.497	PC(O-)32:6	DLPC	0.0044729	0.00604891	0.00633246	0.00634355	0.00464653	0.00987153	0.00634198	0.00977653	0.00517521	0.00556106	0.00657572	0.00514111	0.00539123	0.00410389	0.00466232	0.00822739	0.00971084	0.00851771	0.00506829	0.00824542	0.00838975	0.00442415	0.00385156	0.00626649	0.00462025	0.0047791	0.00479831	0.00433577	0.0064388	0.00570627	0.00710261	0.0051824	0.0076124	0.00858588	0.00445747	0.00732619	0.00794064	0.00318135	0.00487992	0.00549696	0.00670202	0.0086859	0.00451245	0.0039411	0.00585009	0.00608883	0.00675683
748.622	PC(O-)34:0	DLPC	0.0404663	0.0444628	0.047776	0.0430958	0.0434871	0.0553427	0.0480622	0.0475835	0.0393127	0.0558445	0.0498976	0.0445825	0.0314191	0.0377529	0.0465002	0.0447967	0.0443023	0.0366765	0.0453213	0.048701	0.031895	0.0299171	0.0386819	0.034667	0.0342723	0.0338791	0.030125	0.0472578	0.0486372	0.0346825	0.0399349	0.0343555	0.0488245	0.0410229	0.0324187	0.055481	0.0381912	0.0318941	0.0394451	0.0445361	0.0456134	0.0478232	0.0275286	0.0274706	0.0314845	0.0469916	0.0425448
746.606	PC(O-)34:1	DLPC	0.238295	0.268739	0.288605	0.293061	0.265577	0.3074	0.278186	0.255922	0.263641	0.346559	0.279281	0.243223	0.20577	0.240819	0.215557	0.229888	0.348713	0.213525	0.270061	0.295622	0.197184	0.178862	0.222214	0.236691	0.245796	0.211779	0.168277	0.335956	0.266787	0.239581	0.266572	0.206012	0.305407	0.236395	0.178716	0.260167	0.196834	0.190206	0.239445	0.250871	0.298017	0.273851	0.189244	0.172879	0.196169	0.265632	0.268678
744.591	PC(O-)34:2	DLPC	0.369993	0.298072	0.3857	0.325436	0.328002	0.282004	0.238039	0.205234	0.373252	0.402142	0.436465	0.272508	0.143408	0.297967	0.326916	0.208993	0.36889	0.338344	0.387911	0.315612	0.167925	0.177029	0.319947	0.301213	0.313518	0.351925	0.237595	0.497756	0.286975	0.243298	0.308589	0.382814	0.388157	0.242506	0.203682	0.223263	0.218382	0.318872	0.176787	0.196102	0.206284	0.253451	0.188929	0.149451	0.206032	0.226162	0.201212
742.575	PC(O-)34:3	DLPC	0.270889	0.134194	0.229339	0.152849	0.182174	0.12567	0.116786	0.114163	0.265268	0.176747	0.369128	0.170244	0.0731836	0.173669	0.183622	0.118032	0.156389	0.188776	0.155292	0.126838	0.0891358	0.0690978	0.114866	0.189393	0.215625	0.154452	0.128354	0.191748	0.18845	0.0930402	0.13972	0.247003	0.144334	0.177411	0.0962207	0.123228	0.103076	0.170061	0.0565854	0.124886	0.07393	0.129862	0.0725944	0.0716118	0.117048	0.0954582	0.0760706
740.559	PC(O-)34:4	DLPC	0.0063181	0.00426383	0.00454036	0.00562821	0.0060093	0.00472389	0.00465847	0.00349928	0.00644148	0.00414782	0.00821511	0.00381919	0.00160615	0.00517468	0.00743083	0.00359993	0.00381154	0.00467143	0.00440005	0.00420306	0.00262834	0.00241403	0.00262887	0.00515106	0.00687941	0.00303824	0.00286954	0.0046303	0.00462003	0.00225932	0.00303618	0.00573362	0.00575397	0.00547226	0.00838721	0.00351215	0.0034591	0.00703786	0.00377513	0.00459463	0.00190172	0.00298133	0.00209971	0.00172497	0.00342857	0.00272119	0.00193826
738.544	PC(O-)34:5	DLPC	0.00152245	0.00169338	0.00167791	0.00138745	0.00135244	0.00147945	0.00116205	0.00178438	0.00133345	0.000947315	0.00166586	0.00111777	0.000719939	0.00151834	0.00313097	0.00207165	0.00141493	0.00106445	0.00117071	0.00167795	0.000583434	0.00147316	0.00108296	0.00170783	0.00115445	0.000613751	0.00115243	0.00107326	0.0012249	0.00083678	0.000862219	0.00218386	0.00215737	0.00141511	0.00455596	0.00146479	0.00131608	0.00297726	0.00133942	0.00118488	0.000720604	0.0013297	0.000935161	0.00105143	0.00106127	0.00117647	0.000590664
776.653	PC(O-)36:0	DLPC	0.0270272	0.0464288	0.0278534	0.0248734	0.0292357	0.0269354	0.0313	0.0346861	0.0279488	0.035729	0.0323353	0.0278127	0.0250222	0.0338383	0.0359962	0.044451	0.0305435	0.0234643	0.0263355	0.0239078	0.0246454	0.0232028	0.0292922	0.0292105	0.0268906	0.0219624	0.0228667	0.029368	0.0259978	0.0197595	0.0247196	0.0194285	0.0332904	0.0279611	0.0223562	0.029212	0.0254346	0.0330351	0.0323995	0.027225	0.0301122	0.0265156	0.0236376	0.0170106	0.0262417	0.0299603	0.0248793
774.638	PC(O-)36:1	DLPC	0.208362	0.307648	0.194812	0.259861	0.226323	0.230359	0.223396	0.222531	0.218218	0.295427	0.23476	0.211276	0.158605	0.264044	0.231367	0.243128	0.160652	0.175149	0.221183	0.188094	0.151158	0.125681	0.277421	0.204455	0.203018	0.199217	0.149269	0.263596	0.220997	0.188316	0.230565	0.147187	0.229115	0.186535	0.124321	0.219758	0.185511	0.22137	0.235534	0.241825	0.26346	0.250422	0.16419	0.122575	0.160526	0.228892	0.218305
772.622	PC(O-)36:2	DLPC	0.535143	0.538337	0.455824	0.470882	0.479281	0.385178	0.457726	0.288259	0.430835	0.498051	0.523863	0.396093	0.243046	0.528725	0.463791	0.32404	0.351189	0.337687	0.505111	0.438758	0.211145	0.153548	0.535036	0.382076	0.410767	0.564636	0.304708	0.516612	0.361354	0.383402	0.419977	0.370744	0.363718	0.352056	0.282482	0.445608	0.333583	0.414802	0.387979	0.312509	0.415098	0.40525	0.393633	0.22324	0.290903	0.384387	0.329884
770.606	PC(O-)36:3	DLPC	0.311894	0.228848	0.286387	0.266106	0.256707	0.229505	0.229253	0.154497	0.279731	0.319248	0.284507	0.202335	0.137246	0.254333	0.246894	0.204103	0.194434	0.261033	0.367855	0.251447	0.174222	0.185363	0.221548	0.240891	0.281948	0.250599	0.226808	0.410835	0.23134	0.189039	0.211087	0.267877	0.236456	0.179151	0.18871	0.181996	0.181448	0.238381	0.157049	0.200837	0.177472	0.196142	0.181597	0.138473	0.169027	0.184383	0.175618
768.591	PC(O-)36:4	DLPC	0.663066	0.409103	0.480803	0.641703	0.482569	0.567034	0.474885	0.439279	0.617888	0.530921	0.614427	0.513361	0.268936	0.519616	0.582298	0.528216	0.404348	0.558757	0.813558	0.570696	0.354599	0.393754	0.426144	0.503577	0.479155	0.439168	0.508016	1.20147	0.563614	0.470698	0.606852	0.726198	0.554811	0.458115	0.427405	0.392376	0.442318	0.66508	0.360052	0.550287	0.304915	0.415334	0.411721	0.479272	0.383315	0.361482	0.229453
766.575	PC(O-)36:5	DLPC	0.507107	0.199062	0.308176	0.33703	0.246508	0.300587	0.28586	0.287354	0.401724	0.333676	0.56016	0.343362	0.161855	0.325977	0.462671	0.257646	0.184824	0.329279	0.357086	0.28391	0.193948	0.142448	0.211413	0.276458	0.279006	0.203742	0.300106	0.408316	0.366461	0.226814	0.30488	0.419261	0.368096	0.440587	0.328024	0.238945	0.237378	0.525523	0.15413	0.369737	0.146512	0.25899	0.208589	0.189669	0.24252	0.192067	0.132332
764.559	PC(O-)36:6	DLPC	0.0670694	0.0244457	0.0331651	0.0256769	0.0312719	0.0430172	0.044942	0.0300683	0.033231	0.0278796	0.0582148	0.0305672	0.027077	0.0418088	0.0580233	0.0259406	0.0197696	0.027873	0.0281295	0.0250064	0.0244323	0.0204755	0.0210334	0.029241	0.0313126	0.0210635	0.037809	0.0241531	0.0396864	0.0160957	0.0195937	0.0269036	0.0330409	0.0748362	0.0335963	0.0311605	0.0245392	0.0460683	0.0269789	0.0316181	0.0203887	0.0231888	0.0185858	0.0187388	0.0274202	0.0308088	0.0220792
802.669	PC(O-)38:1	DLPC	0.0655044	0.104253	0.0627218	0.0892383	0.0607444	0.0488884	0.0789229	0.0709378	0.0731593	0.103293	0.105502	0.0738793	0.0513537	0.0988182	0.121818	0.0832636	0.0619609	0.0750873	0.0674671	0.0673123	0.0488224	0.0471041	0.0839771	0.0576979	0.0674877	0.0804354	0.0645948	0.0838742	0.105676	0.0902572	0.0781817	0.0763258	0.0886055	0.103797	0.0731778	0.0487333	0.071716	0.0906859	0.0505777	0.098927	0.097884	0.0862885	0.0452826	0.0408898	0.0579285	0.0947361	0.0806015
800.653	PC(O-)38:2	DLPC	0.111552	0.148484	0.09461	0.154232	0.0972564	0.0926734	0.0995647	0.0994214	0.106232	0.144211	0.131676	0.118488	0.0675554	0.139105	0.14417	0.117188	0.102968	0.109627	0.0993912	0.104948	0.0815045	0.0742588	0.128184	0.0972166	0.0971949	0.134974	0.0721322	0.163279	0.107714	0.126759	0.108343	0.0831902	0.109616	0.108294	0.0879918	0.0811416	0.0835464	0.13571	0.0884894	0.147509	0.12907	0.111817	0.0810396	0.0594583	0.0791797	0.11252	0.104119
798.638	PC(O-)38:3	DLPC	0.109915	0.166104	0.123117	0.194582	0.131608	0.152333	0.123219	0.118064	0.157509	0.17277	0.12783	0.122715	0.0912347	0.143569	0.139902	0.19598	0.12723	0.126524	0.183395	0.111319	0.0919091	0.108092	0.130168	0.147692	0.130866	0.121772	0.0856739	0.208093	0.137274	0.172937	0.137689	0.110518	0.154373	0.0986727	0.0889967	0.156513	0.130825	0.120909	0.15531	0.166676	0.13117	0.13697	0.102063	0.100135	0.0925147	0.140269	0.134976
796.622	PC(O-)38:4	DLPC	0.413313	0.383684	0.382577	0.540411	0.45418	0.466915	0.356799	0.398777	0.510516	0.435625	0.481658	0.490001	0.2641	0.447617	0.460493	0.453036	0.282699	0.364292	0.618052	0.506775	0.264618	0.301669	0.318476	0.406368	0.339324	0.313642	0.295353	0.787683	0.417976	0.514606	0.445988	0.392285	0.54302	0.316077	0.341358	0.284009	0.43357	0.450827	0.440032	0.51508	0.290177	0.438203	0.333866	0.320953	0.294231	0.379121	0.2316
794.606	PC(O-)38:5	DLPC	0.690415	0.611287	0.609083	0.68075	0.61392	0.716056	0.55515	0.514861	0.586858	0.504259	0.670018	0.632026	0.30884	0.654454	0.568781	0.524749	0.375333	0.408516	0.87284	0.664085	0.384749	0.443201	0.445059	0.542199	0.490173	0.391739	0.480137	1.07629	0.516678	0.535828	0.500024	0.630802	0.624411	0.477114	0.585029	0.338306	0.599013	0.588891	0.474367	0.636233	0.340862	0.4562	0.442626	0.409876	0.402411	0.460769	0.259348
792.591	PC(O-)38:6	DLPC	0.349833	0.169324	0.221074	0.322183	0.188308	0.288207	0.234351	0.178356	0.222767	0.151699	0.342593	0.183741	0.100202	0.309248	0.313741	0.155839	0.157461	0.168027	0.274539	0.197563	0.15033	0.0984424	0.193052	0.188206	0.184838	0.152345	0.234978	0.345536	0.191611	0.159902	0.140656	0.244908	0.215203	0.26286	0.266898	0.106676	0.200874	0.322138	0.157259	0.202415	0.128725	0.148299	0.138391	0.182249	0.14845	0.172207	0.0947581
828.685	PC(O-)40:2	DLPC	0.0406414	0.0272055	0.0285032	0.0336784	0.0331745	0.0385348	0.0292769	0.0473639	0.0406401	0.0257632	0.0389254	0.0268427	0.0298844	0.0413233	0.0361535	0.0654398	0.0616953	0.0505983	0.0318441	0.0278009	0.0245314	0.0187915	0.024813	0.0576199	0.0224546	0.0425169	0.026451	0.0362351	0.0408423	0.0330926	0.0316684	0.0484396	0.0289848	0.0376842	0.0298504	0.0154956	0.0372801	0.0499757	0.0308022	0.0344513	0.0435064	0.0395372	0.0223804	0.0180186	0.0230592	0.0744182	0.0614733
826.669	PC(O-)40:3	DLPC	0.0388374	0.0552303	0.0407146	0.0401667	0.0646816	0.0427553	0.0211833	0.0720443	0.0638428	0.0277023	0.0296995	0.022378	0.0527728	0.0560957	0.0405801	0.17177	0.14172	0.0878106	0.0629587	0.0280002	0.0214007	0.0288244	0.0256946	0.160163	0.0289158	0.0660905	0.0363209	0.0433099	0.0341509	0.0586227	0.0235259	0.0925748	0.0330299	0.0360197	0.0267706	0.020907	0.0449707	0.0735004	0.038396	0.0333445	0.0450753	0.0521679	0.0483306	0.0350547	0.0166049	0.153742	0.143588
824.653	PC(O-)40:4	DLPC	0.0780203	0.0921393	0.0764755	0.082005	0.103406	0.0845909	0.0416898	0.0800208	0.0845702	0.0963478	0.0626294	0.0720641	0.0690499	0.0795986	0.0737156	0.199761	0.161752	0.119696	0.114371	0.0655665	0.0349862	0.0473755	0.0392124	0.182139	0.0475294	0.124227	0.064553	0.0996322	0.0653915	0.105751	0.0602043	0.180081	0.054493	0.0609923	0.0670551	0.0396261	0.0987294	0.173447	0.0758089	0.0707809	0.0569351	0.0846508	0.0847398	0.0794352	0.0410173	0.182465	0.127642
822.638	PC(O-)40:5	DLPC	0.131746	0.128744	0.111182	0.125176	0.0981773	0.123153	0.0825576	0.0865478	0.093861	0.104127	0.123479	0.112223	0.048911	0.125548	0.118527	0.117011	0.0756585	0.0936548	0.107949	0.0925641	0.0482692	0.0445111	0.0727086	0.108481	0.0721259	0.0836367	0.0697626	0.138087	0.0801078	0.0973768	0.075945	0.0746053	0.0848224	0.0776086	0.0980614	0.0635579	0.0968495	0.111736	0.0951587	0.107638	0.0617264	0.0796816	0.0666593	0.0933682	0.0679109	0.0940062	0.0519787
820.622	PC(O-)40:6	DLPC	0.235964	0.151464	0.144687	0.211648	0.141731	0.16395	0.12266	0.106163	0.123754	0.104589	0.209546	0.139671	0.0718143	0.240381	0.206215	0.107263	0.101204	0.101232	0.159248	0.123866	0.0607975	0.0447866	0.138852	0.122736	0.109283	0.116806	0.103525	0.199909	0.118816	0.11165	0.0884527	0.126468	0.117599	0.120971	0.135252	0.0820246	0.141103	0.227094	0.124102	0.142723	0.0920846	0.106631	0.0927481	0.0776154	0.0814044	0.12776	0.0655714
858.732	PC(O-)42:1	DLPC	0.00953616	0.00965128	0.00714649	0.00800345	0.00962946	0.00872518	0.00677718	0.01019	0.00747467	0.005213	0.0055332	0.00424279	0.00637276	0.00767433	0.00751765	0.0143683	0.0118418	0.00720572	0.0069613	0.00646439	0.00572054	0.00493048	0.00465186	0.00872603	0.00689663	0.00726863	0.00630777	0.00878881	0.00575093	0.00735518	0.00442755	0.00865678	0.00428531	0.00574536	0.00744509	0.00485757	0.00504387	0.00898797	0.00621607	0.00604097	0.00491867	0.00562422	0.00591212	0.0072156	0.00559282	0.00858342	0.0071768
856.716	PC(O-)42:2	DLPC	0.0228025	0.0149265	0.0142115	0.0126327	0.0192583	0.0190951	0.0116814	0.0138156	0.0160649	0.012958	0.0132513	0.00946685	0.00986799	0.0168009	0.0141951	0.0222483	0.018955	0.0146211	0.0152692	0.012347	0.0102449	0.0069798	0.00771697	0.015331	0.0141795	0.0141794	0.0116901	0.013123	0.0126567	0.0160231	0.0092396	0.0181941	0.00802782	0.0138363	0.0200317	0.00814264	0.0102736	0.0153583	0.0101381	0.0112504	0.0109931	0.0118893	0.0121018	0.0105664	0.0122913	0.0181737	0.0177125
854.7	PC(O-)42:3	DLPC	0.0357734	0.0271514	0.0317381	0.0246288	0.0327498	0.0250468	0.0168104	0.0248496	0.0305131	0.025326	0.0227206	0.0143466	0.0197698	0.0349489	0.0283009	0.0611361	0.0413871	0.0371343	0.0322918	0.021715	0.0131703	0.011853	0.0140613	0.0486819	0.0201784	0.0321324	0.0180136	0.0250466	0.0203231	0.0276997	0.0123213	0.0468807	0.0130213	0.0205688	0.0263919	0.0112818	0.0166313	0.0362457	0.0108869	0.0169139	0.0174096	0.0214351	0.023582	0.0235277	0.0139917	0.0403837	0.0443419
852.685	PC(O-)42:4	DLPC	0.0369272	0.0379998	0.0381588	0.0264085	0.0455519	0.0387825	0.0169178	0.0237398	0.048253	0.0245133	0.0255452	0.0242351	0.0301205	0.0373636	0.0329466	0.101322	0.0772754	0.0332197	0.0497313	0.0278231	0.0124653	0.0166724	0.0139101	0.0735268	0.0214635	0.0583534	0.0269539	0.0406776	0.0287124	0.0552462	0.0189949	0.0680848	0.0179566	0.0251002	0.0300286	0.0124106	0.0205937	0.0528027	0.0151087	0.0229105	0.0237508	0.0329942	0.0322919	0.0349747	0.0141785	0.0772098	0.0735686
850.669	PC(O-)42:5	DLPC	0.0533736	0.0597283	0.048302	0.0413773	0.0604411	0.0537269	0.0251091	0.0355825	0.0600673	0.0511794	0.0437745	0.0418243	0.0300681	0.0474218	0.0418562	0.0942717	0.053949	0.0449742	0.0427784	0.0446016	0.0208878	0.0281084	0.023967	0.0669573	0.0291562	0.0485734	0.032047	0.0639516	0.0389856	0.0693838	0.0301916	0.0723844	0.0244062	0.0308965	0.0576171	0.0191227	0.0340558	0.0724492	0.0202128	0.0469746	0.026774	0.039261	0.0302564	0.0657847	0.0236271	0.06021	0.0402801
848.653	PC(O-)42:6	DLPC	0.0574604	0.0350745	0.0334052	0.0335351	0.0520914	0.0403218	0.0178505	0.0275707	0.0352799	0.038671	0.037877	0.0256254	0.0254187	0.0413186	0.0443598	0.0807178	0.052858	0.0347851	0.0315049	0.0348103	0.0110854	0.0124276	0.0176448	0.0446788	0.0225174	0.032973	0.0289087	0.0417074	0.0278481	0.0463738	0.0176249	0.0625502	0.0184145	0.0262502	0.034096	0.0139108	0.0246038	0.0590098	0.0170431	0.0343032	0.0165896	0.0256057	0.0214105	0.0310672	0.0174421	0.043835	0.0221181
886.763	PC(O-)44:1	DLPC	0.00151578	0.00251335	0.00100622	0.00109071	0.00239284	0.00142609	0.00062349	0.00213956	0.00208972	0.00131921	0.000769289	0.000411112	0.00120267	0.00209204	0.00153746	0.00538273	0.00509669	0.00283272	0.0024956	0.001316	0.00077175	0.00074166	0.000664072	0.00311711	0.00078077	0.00144183	0.00107306	0.00183278	0.00113642	0.00200523	0.000375716	0.00403376	0.000735407	0.00129275	0.00172812	0.000693172	0.00089452	0.00476458	0.00176943	0.000931891	0.000915777	0.00127571	0.0015456	0.00145228	0.000569017	0.00360253	0.00320563
884.747	PC(O-)44:2	DLPC	0.00189027	0.00261401	0.0014465	0.00133799	0.00257411	0.0018876	0.00092988	0.00233461	0.00211057	0.00152217	0.00124924	0.000569758	0.0016491	0.00207175	0.00146709	0.00500391	0.00492495	0.00203446	0.00193577	0.00127383	0.000841502	0.000704561	0.00055358	0.00270296	0.00100919	0.0016228	0.000979111	0.00184676	0.00100378	0.00223655	0.000602108	0.00324236	0.0013589	0.00151097	0.001402	0.000688537	0.000887817	0.00354198	0.00185451	0.00082472	0.000954728	0.00113797	0.00127018	0.0012767	0.00065515	0.00304611	0.00238568
882.732	PC(O-)44:3	DLPC	0.00452153	0.00430813	0.00329558	0.00260626	0.00467459	0.00322167	0.00181559	0.00328289	0.00498579	0.00466693	0.00267026	0.00170122	0.00257327	0.00417383	0.0029834	0.00961717	0.00578123	0.00366795	0.00380318	0.00298141	0.00146624	0.00174479	0.00161906	0.00528342	0.00216364	0.00369452	0.00213004	0.00360382	0.00217454	0.00477874	0.00139887	0.0068173	0.00176645	0.00349814	0.00317658	0.00150615	0.00257147	0.00758145	0.00341156	0.0019651	0.00262868	0.00280216	0.00283043	0.00340088	0.0013655	0.00636027	0.00474066
880.716	PC(O-)44:4	DLPC	0.0196802	0.0159257	0.0150219	0.0124752	0.0154524	0.014222	0.00886033	0.00884147	0.0194178	0.0239658	0.0140603	0.0120664	0.00899453	0.0149219	0.0102487	0.0310682	0.020678	0.0129262	0.0139355	0.013204	0.00681679	0.0102128	0.00557524	0.0156604	0.0100893	0.0135162	0.00800262	0.018866	0.0121	0.0210639	0.00922373	0.0169624	0.00805091	0.010099	0.014859	0.00500576	0.010068	0.0232817	0.00858272	0.0119455	0.0103081	0.00891726	0.00752613	0.0138118	0.00666218	0.0209208	0.0153461
878.7	PC(O-)44:5	DLPC	0.0622319	0.0624504	0.0529711	0.0484248	0.0606192	0.0521716	0.0339069	0.0352245	0.0626699	0.0751469	0.0552242	0.0516829	0.0311821	0.0520683	0.0328864	0.080867	0.0545989	0.0410305	0.0433321	0.0453865	0.0238699	0.0274479	0.0182881	0.0494784	0.0356839	0.0433788	0.028785	0.0729462	0.0441777	0.0737214	0.0322356	0.0362212	0.0278331	0.0306469	0.0580393	0.0163434	0.0371952	0.0682388	0.0271936	0.0472684	0.0348119	0.0327334	0.0233408	0.0655184	0.0273059	0.0541476	0.0384071
876.685	PC(O-)44:6	DLPC	0.0479231	0.035166	0.0306732	0.0331279	0.0471544	0.0353318	0.0205885	0.0247081	0.0373389	0.0372597	0.0382069	0.0291277	0.0183451	0.0398968	0.0281707	0.0657529	0.0464367	0.034301	0.0290779	0.0282809	0.0108904	0.0136404	0.011947	0.0396396	0.0186226	0.0319302	0.0212991	0.0451625	0.0259793	0.0574168	0.020022	0.0434208	0.0151867	0.0232844	0.0548391	0.00880901	0.0248734	0.0579562	0.0188904	0.0225486	0.0178415	0.0203381	0.0124415	0.0325197	0.014628	0.0410236	0.0262539
678.507	PC28:0	DLPC	0.00533338	0.00781752	0.0106358	0.0114594	0.00896386	0.017513	0.00880382	0.0129931	0.00818443	0.00901161	0.00743705	0.00718741	0.00573153	0.00594025	0.0115536	0.0105059	0.0156118	0.0111791	0.00799754	0.013044	0.0123437	0.0079447	0.00834915	0.0134606	0.0069723	0.00814866	0.00580708	0.00560299	0.00877386	0.00946399	0.0188932	0.00834644	0.00930742	0.0145535	0.00832909	0.0174843	0.0133493	0.00578165	0.0106742	0.00643331	0.0105316	0.0157998	0.00771512	0.00421405	0.00885396	0.00917741	0.0131302
676.492	PC28:1	DLPC	0.0321687	0.0484965	0.041739	0.0543199	0.040468	0.0569045	0.0554195	0.057841	0.0495022	0.0451701	0.0421362	0.0585816	0.0219559	0.0486165	0.0567497	0.0361041	0.0531518	0.0464859	0.0414883	0.0472717	0.0439974	0.0324124	0.0500079	0.0308104	0.0441892	0.0429999	0.0346758	0.0474714	0.0532882	0.053304	0.0542818	0.0498838	0.0590148	0.0450702	0.0298375	0.0338398	0.0516351	0.0629864	0.0469404	0.0666909	0.0549328	0.0619862	0.0292079	0.0202476	0.0400924	0.060257	0.0459179
674.476	PC28:2	DLPC	0.00345156	0.00506385	0.00480384	0.00585188	0.00553081	0.00485077	0.00392358	0.00529669	0.00434125	0.00344375	0.00437201	0.00344714	0.00224323	0.00410611	0.00522638	0.00616167	0.00687878	0.00733896	0.00424285	0.0054678	0.00555056	0.00420801	0.00721612	0.00320452	0.00471646	0.00537636	0.00248926	0.00679139	0.00403505	0.00663226	0.00454004	0.00500873	0.00425816	0.00473854	0.00482664	0.00401634	0.00353302	0.00665082	0.00554259	0.00573039	0.00502185	0.00390085	0.00285241	0.00163946	0.00289092	0.0041312	0.00339586
706.539	PC30:0	DLPC	0.0585612	0.0865502	0.0880143	0.094527	0.0845484	0.185825	0.111586	0.137549	0.0866006	0.124977	0.108828	0.101373	0.100269	0.0651854	0.0939849	0.10268	0.130798	0.132438	0.0879037	0.148542	0.13673	0.0713763	0.0699681	0.0827685	0.0920007	0.0841296	0.0855965	0.0811994	0.124039	0.0980028	0.123469	0.0733187	0.12047	0.141151	0.0753453	0.119765	0.153509	0.0673889	0.0669107	0.0933962	0.125941	0.144154	0.0797207	0.065554	0.102748	0.115536	0.11299
704.523	PC30:1	DLPC	0.389255	0.491784	0.392383	0.500977	0.43155	0.425771	0.535661	0.400776	0.560024	0.743197	0.56595	0.548151	0.419322	0.515479	0.54582	0.378954	0.400719	0.449863	0.363665	0.439748	0.379135	0.322125	0.364475	0.323367	0.462319	0.428991	0.387232	0.602193	0.58208	0.474791	0.418078	0.569545	0.526982	0.50027	0.529379	0.263218	0.495742	0.644954	0.285922	0.693328	0.541296	0.52846	0.31949	0.393694	0.405066	0.606642	0.42982
702.507	PC30:2	DLPC	0.0620977	0.0873579	0.06712	0.0835666	0.075195	0.0671442	0.0675626	0.063037	0.078175	0.087596	0.0855327	0.0731823	0.05186	0.074703	0.0851418	0.0622175	0.0794251	0.0979315	0.0843646	0.06811	0.058862	0.064567	0.0911921	0.0614583	0.0911772	0.0790901	0.0601339	0.119575	0.0802564	0.0791387	0.0714054	0.0914841	0.0889036	0.0737304	0.0864945	0.0500947	0.055461	0.136308	0.0492982	0.0975307	0.0945481	0.0675091	0.0584078	0.0397311	0.0610227	0.0869634	0.0598301
700.492	PC30:3	DLPC	0.000928679	0.00156032	0.000955307	0.00138678	0.000895002	0.000994705	0.000769843	0.00152154	0.000824341	0.000740378	0.000871212	0.000556471	0.000571268	0.000944223	0.00119428	0.00150875	0.0012366	0.00110968	0.000873324	0.00106604	0.000903022	0.000980869	0.00102492	0.0010913	0.000897851	0.000613044	0.000589344	0.00117015	0.000770005	0.000870341	0.000921013	0.00136676	0.000979528	0.00109681	0.0014639	0.0014327	0.000852625	0.00129079	0.00142844	0.000897245	0.000873786	0.000869486	0.000604795	0.000600511	0.000688922	0.000951569	0.00064694
694.445	PC30:6	DLPC	0.000677088	0.00113368	0.000957474	0.000909817	0.000790923	0.00071664	0.000570243	0.0013482	0.000884572	0.000903204	0.00117826	0.000564121	0.000678372	0.00076831	0.000877291	0.00153006	0.00126685	0.00101952	0.000650476	0.000815525	0.000581123	0.000790373	0.000513019	0.00124434	0.000501551	0.000469886	0.000629079	0.000584781	0.000477247	0.000719148	0.000703688	0.00186675	0.000829427	0.00108356	0.000842175	0.000809643	0.000811474	0.000726067	0.00109235	0.00052261	0.000786214	0.00111286	0.000599548	0.000629648	0.000509277	0.000840725	0.000628569
734.57	PC32:0	DLPC	0.25994	0.263634	0.292473	0.28952	0.304502	0.419067	0.347729	0.391142	0.328772	0.383084	0.315563	0.387687	0.353537	0.248544	0.247997	0.329272	0.349157	0.364912	0.270593	0.320724	0.360654	0.405282	0.223317	0.235999	0.259749	0.245515	0.304122	0.349342	0.360478	0.334896	0.340267	0.299326	0.306992	0.452124	0.32442	0.194929	0.339668	0.228522	0.286088	0.350844	0.354735	0.327371	0.293749	0.306679	0.32844	0.370319	0.421889
732.554	PC32:1	DLPC	0.558176	0.431405	0.608168	0.665313	0.550249	1.13775	0.743725	1.23238	0.620683	0.640513	0.527626	0.590762	1.26854	0.299032	0.448092	0.835598	1.15472	0.631632	0.350415	0.463095	1.84188	1.37841	0.591123	0.626565	0.640892	0.350558	0.689559	0.632613	0.896165	0.839934	0.739739	0.532021	0.784427	0.92767	0.781192	0.551167	0.757068	0.442218	0.839326	0.7768	1.1244	0.895652	0.540848	0.573656	1.00079	0.687948	1.47191
730.539	PC32:2	DLPC	0.136679	0.149322	0.192582	0.217678	0.158865	0.181762	0.164978	0.206558	0.16393	0.204925	0.174712	0.146698	0.164841	0.107632	0.161443	0.172087	0.240886	0.25872	0.121421	0.186527	0.217783	0.142005	0.188476	0.126244	0.194501	0.170597	0.164573	0.211461	0.195755	0.243168	0.198795	0.204945	0.137837	0.263374	0.186144	0.138407	0.195815	0.187778	0.110461	0.168745	0.18544	0.192934	0.19367	0.107631	0.160095	0.176129	0.19183
728.523	PC32:3	DLPC	0.00661684	0.00790647	0.00654241	0.00768689	0.00774999	0.00869568	0.00692561	0.00866322	0.00526359	0.00690977	0.00838131	0.00625486	0.00484837	0.00618061	0.00856448	0.00731705	0.0104647	0.00859793	0.00509329	0.0086021	0.00704467	0.00523792	0.00835209	0.00783288	0.00758241	0.00710497	0.00529681	0.00846419	0.00841054	0.00798888	0.00698276	0.00771776	0.00674644	0.0102085	0.00703555	0.00740086	0.00663647	0.00744075	0.00463023	0.00728898	0.00747636	0.007879	0.00504369	0.00314017	0.00545419	0.00650868	0.0052697
726.507	PC32:4	DLPC	0.000722158	0.00138406	0.00107621	0.00104393	0.000813142	0.00116882	0.0008219	0.00127664	0.000703345	0.000877532	0.000872488	0.000533922	0.000821917	0.00104459	0.00118746	0.00191538	0.00172524	0.0011679	0.00100794	0.00107222	0.000629502	0.000793438	0.00122492	0.00121113	0.000679173	0.000750074	0.000655137	0.000826111	0.00076812	0.00104277	0.000922288	0.00179172	0.0011026	0.00118574	0.000935804	0.00133274	0.000908672	0.000878292	0.00168827	0.000805781	0.00104686	0.000940868	0.000656177	0.000540347	0.000853099	0.000852571	0.00061764
724.492	PC32:5	DLPC	0.000481834	0.00244581	0.000764852	0.000768355	0.000848225	0.000477556	0.000437722	0.00121187	0.000746647	0.000520108	0.000538965	0.000418561	0.000528593	0.000622826	0.00061529	0.00198168	0.00112975	0.000722314	0.000484845	0.000585375	0.000452305	0.000888928	0.000530642	0.000980089	0.000469193	0.0004442	0.00059773	0.000483435	0.000514414	0.000523951	0.000511155	0.00173372	0.00089439	0.000809834	0.00141416	0.000819493	0.000747792	0.000651156	0.00106094	0.000433764	0.000436203	0.000880247	0.000480747	0.000471479	0.000488418	0.00046267	0.000471369
722.476	PC32:6	DLPC	0.00403347	0.00736141	0.00637969	0.00637941	0.00541016	0.0071343	0.00508013	0.00588922	0.00511961	0.00679545	0.00561391	0.00439137	0.00324277	0.00438081	0.00451217	0.00739814	0.00658847	0.00528128	0.0060949	0.00600936	0.00387897	0.00495516	0.00409408	0.00439309	0.00389046	0.00417537	0.00393831	0.00574977	0.00453735	0.00463885	0.00604956	0.00594584	0.00594036	0.0068941	0.00536044	0.00520596	0.0052649	0.0041091	0.0059582	0.00446498	0.00601125	0.00567695	0.00332098	0.00372415	0.00396992	0.00558385	0.004583
762.601	PC34:0	DLPC	0.719531	0.790185	0.756174	0.622072	0.706202	0.766692	0.859627	0.820805	0.730737	0.874255	0.624791	0.646351	1.20246	0.641013	0.623451	0.777138	0.701765	0.713376	0.668454	0.645287	0.987376	0.848825	0.632847	0.719763	0.738974	0.559384	0.755159	0.599112	0.792947	0.546556	0.616656	0.529994	0.651629	0.744993	0.671241	0.85095	0.689882	0.861144	0.816101	0.792783	0.956767	0.726946	0.659042	0.84859	0.769515	0.79565	0.959453
760.586	PC34:1	DLPC	12.3775	10.9963	12.5483	9.46663	10.737	12.5784	14.0076	13.8785	12.4046	13.6084	10.4641	11.2353	15.874	10.6068	9.93282	13.6575	13.5159	10.9143	11.0985	9.91765	16.9021	14.8223	11.4578	12.6089	12.1341	9.75374	11.3971	10.9612	14.1939	7.86551	10.6802	9.31157	11.9331	12.8406	11.0621	10.5308	12.3742	11.7184	11.9871	12.9643	15.7662	12.1807	12.2195	11.6161	12.9365	13.3601	15.7028
758.57	PC34:2	DLPC	26.7492	24.8025	25.1288	19.3463	20.8588	18.2136	20.2372	16.8596	22.4614	24.4481	23.5524	23.042	20.0899	20.7651	19.5406	18.6737	23.2771	22.8799	22.7833	21.0338	18.1209	23.6149	22.9133	21.6203	20.4883	33.3522	24.9418	17.5813	21.8357	23.4952	24.0836	29.2656	23.3627	23.6294	23.1298	22.4034	22.2209	17.4874	21.9853	15.2374	22.8622	21.3211	26.9497	20.7681	24.4715	23.1413	24.8225
756.554	PC34:3	DLPC	0.632557	0.534699	0.541628	0.659603	0.540587	0.621854	0.49519	0.673338	0.443633	0.545348	0.477869	0.471672	0.598671	0.401545	0.453008	0.513993	0.910162	0.582667	0.457079	0.557211	0.70638	0.61757	0.483756	0.540366	0.58377	0.483003	0.429931	0.517137	0.50767	0.660455	0.542537	0.478902	0.375349	0.609218	0.456904	0.770989	0.48528	0.430857	0.588076	0.450948	0.53786	0.526664	0.456546	0.426269	0.570459	0.469344	0.592268
754.539	PC34:4	DLPC	0.0398004	0.0367252	0.0456565	0.0773824	0.0543176	0.0734111	0.0376024	0.0923266	0.0397694	0.0413473	0.0461002	0.0363816	0.0558033	0.0285496	0.0590431	0.0612438	0.0695352	0.0528534	0.0381475	0.0654271	0.0636416	0.035134	0.0426262	0.05013	0.0437717	0.0311089	0.038205	0.0578839	0.0550811	0.0455288	0.0595912	0.0476902	0.0649836	0.064004	0.0402354	0.0493296	0.060576	0.0506787	0.0464593	0.0570831	0.0366497	0.0605292	0.0423886	0.0333378	0.0490619	0.0399888	0.0303536
752.523	PC34:5	DLPC	0.00809644	0.00443167	0.0066995	0.00769892	0.00736661	0.0127141	0.00704728	0.00878388	0.00489188	0.00438071	0.00909462	0.00497804	0.005509	0.00560818	0.0134415	0.00807824	0.00678705	0.00522107	0.00470857	0.00933364	0.00499356	0.00289825	0.00437073	0.0064214	0.00568059	0.00339112	0.00631905	0.00421501	0.00983366	0.00233757	0.00501804	0.00625062	0.00784498	0.0118929	0.00982569	0.00656623	0.0056954	0.0159159	0.00633224	0.00696362	0.00296212	0.00664687	0.00290102	0.00280667	0.00676676	0.00747819	0.00271752
750.507	PC34:6	DLPC	0.00950384	0.00715202	0.00537845	0.0063861	0.00525892	0.00537602	0.0055589	0.00585126	0.00456043	0.0046492	0.00703047	0.00443405	0.00414284	0.00652303	0.0117602	0.00853104	0.00569755	0.00399435	0.00503381	0.00553779	0.00381961	0.00344038	0.0035247	0.00425822	0.00391707	0.00325916	0.00377448	0.00507976	0.00499844	0.00282505	0.00377642	0.00527375	0.00747842	0.00547689	0.00513233	0.00468351	0.00537029	0.0111407	0.00674621	0.00542628	0.00433164	0.00455189	0.00249937	0.00304708	0.00645784	0.00570705	0.00347608
790.633	PC36:0	DLPC	0.191172	0.173883	0.160605	0.182584	0.177225	0.206927	0.19591	0.150321	0.182333	0.122544	0.245444	0.166176	0.167927	0.237493	0.225584	0.143257	0.155923	0.175798	0.203651	0.174905	0.203465	0.1432	0.170354	0.201328	0.215077	0.125802	0.199297	0.169871	0.196787	0.115827	0.140699	0.162279	0.162304	0.235408	0.193846	0.178563	0.181718	0.212235	0.151191	0.197639	0.173804	0.173519	0.140841	0.131662	0.171548	0.165997	0.177318
788.617	PC36:1	DLPC	2.03257	2.59234	2.2684	2.27221	2.68538	2.61536	2.58497	1.91104	2.33388	2.54636	2.18293	2.1839	2.61301	2.79707	2.38692	1.98124	1.80908	2.75568	2.84667	2.5625	3.13154	2.38641	2.54556	2.73621	3.22766	1.90253	2.93285	1.93332	2.64774	1.92203	2.27497	2.01183	2.26068	2.56482	2.00744	2.90866	2.31437	1.78321	2.10191	2.61869	2.84374	2.58285	2.26141	2.09598	2.70297	2.4116	3.12174
786.601	PC36:2	DLPC	11.2564	12.3282	11.0971	11.5999	11.8169	9.5863	10.5613	7.55592	10.3102	11.5372	10.453	11.398	10.356	13.5182	10.962	8.94052	8.77261	12.8687	13.4724	15.3775	10.4983	11.9707	12.5447	12.0088	13.6308	13.4833	13.6851	10.2087	10.2797	11.5768	11.5401	12.1187	10.5258	10.6718	12.6059	12.8805	9.57009	9.09257	9.82698	9.4364	11.2875	10.7498	11.8139	10.4897	11.517	10.7188	11.1436
784.586	PC36:3	DLPC	5.58591	7.56082	7.06058	8.138	7.34538	6.98593	7.33091	5.82926	8.15509	8.23016	5.78542	6.13927	7.00102	7.20366	5.4977	7.08345	6.65457	8.07045	8.07274	6.81897	8.01376	8.87027	7.21732	7.34812	8.58561	6.38928	6.84655	7.49782	6.86107	8.02681	7.69052	6.38984	6.99623	6.21496	5.72432	8.62022	7.51405	6.15982	6.88155	7.59177	7.4469	6.75616	6.69702	6.54939	7.0829	7.3871	9.21325
782.57	PC36:4	DLPC	6.97501	8.43333	7.04576	9.80169	9.93118	8.71788	7.7424	14.0219	9.75468	8.55224	9.97856	10.7281	8.65106	7.3816	9.13254	11.7794	6.71726	9.98157	8.01264	8.89152	7.84421	9.62038	7.73467	8.54558	7.10167	6.69679	7.41615	12.0847	9.90311	11.9324	11.1592	9.34863	10.0078	7.63036	9.34446	9.61638	10.5274	14.5997	10.2022	10.8463	6.82961	11.1179	8.39352	11.5146	8.83321	7.92875	5.61956
780.554	PC36:5	DLPC	1.08117	0.714936	0.753924	0.97903	1.2208	2.74599	1.44987	1.64801	0.776285	0.73962	1.26511	1.00846	1.14002	1.03197	1.78525	1.10391	0.820702	0.739355	0.850347	0.970411	0.705604	0.73096	0.683375	0.926047	0.645692	0.48589	1.11999	0.671848	1.11427	0.43882	0.994959	0.445205	0.940912	1.48768	1.42911	0.826388	0.867772	3.0342	0.901646	0.926559	0.552371	0.894117	0.511912	0.327085	1.37692	1.86661	0.449426
778.539	PC36:6	DLPC	0.0354225	0.0216307	0.0275121	0.046858	0.0273964	0.0510503	0.0317467	0.0424502	0.0229709	0.0168426	0.0421669	0.0188415	0.0273278	0.0316896	0.0545208	0.0274221	0.0449776	0.0223349	0.018963	0.0338365	0.0244212	0.0144558	0.0300723	0.0270482	0.0288768	0.016152	0.029782	0.0271609	0.0283157	0.0151533	0.0223535	0.0217898	0.0307109	0.0467393	0.0303611	0.022044	0.0311254	0.0506672	0.0236924	0.0294922	0.0173409	0.0228359	0.0184251	0.0105332	0.0268719	0.0314521	0.0135946
818.664	PC38:0	DLPC	0.157785	0.0814071	0.1122	0.112654	0.0640683	0.0931565	0.0719785	0.05106	0.077165	0.0472698	0.125792	0.0653334	0.0401794	0.142005	0.114018	0.0567572	0.0652226	0.0557341	0.0959155	0.0676499	0.0438205	0.0344412	0.0637491	0.0741912	0.0739054	0.059947	0.076799	0.122941	0.0696506	0.0397901	0.0372828	0.080805	0.0696522	0.0924001	0.105078	0.0496522	0.0810073	0.141949	0.0587632	0.0814496	0.0627481	0.0554785	0.0598172	0.0709665	0.0466042	0.0687607	0.0380904
816.648	PC38:1	DLPC	0.152182	0.147999	0.134857	0.164133	0.0993267	0.0931439	0.144021	0.121405	0.170917	0.174468	0.188259	0.127941	0.122689	0.191681	0.188492	0.129308	0.145554	0.149519	0.157825	0.155334	0.134302	0.0999325	0.11957	0.113715	0.14112	0.137906	0.132024	0.151711	0.205505	0.125882	0.139209	0.185291	0.167216	0.177344	0.127013	0.0766868	0.163117	0.158533	0.0782724	0.173219	0.179335	0.134255	0.0932243	0.0972917	0.12618	0.198027	0.148828
814.633	PC38:2	DLPC	0.56856	0.502513	0.513717	0.693711	0.406378	0.474117	0.489379	0.476412	0.57704	0.641984	0.616818	0.535766	0.584076	0.709009	0.729212	0.507698	0.521384	0.680806	0.555156	0.523242	0.691051	0.567374	0.56551	0.532625	0.68745	0.609565	0.580919	0.733026	0.752475	0.597754	0.519188	0.573054	0.609006	0.564759	0.593684	0.405915	0.543829	0.724759	0.42861	0.873937	0.696804	0.5647	0.447686	0.563886	0.54593	0.694347	0.647189
812.617	PC38:3	DLPC	1.22209	1.2192	1.76142	2.44906	1.73245	2.24833	1.47107	1.42973	2.06899	1.51446	1.46694	1.66701	2.13305	1.93884	2.37874	2.0692	2.0039	2.87917	2.34023	2.30428	2.90006	1.73082	2.26262	1.93775	2.94492	1.59273	2.03455	2.32788	2.45127	2.34576	1.98306	1.63815	1.76545	1.56749	1.89254	2.13557	2.25702	2.00268	1.9716	3.49026	2.25419	2.31978	2.01073	2.7173	1.81884	2.18734	2.62503
810.601	PC38:4	DLPC	3.08565	3.56107	3.02034	5.11103	3.56885	4.71052	3.25181	5.41026	3.87714	3.20541	4.2346	5.30627	4.82222	3.88279	5.8899	4.94245	3.60455	4.99201	4.06458	4.48987	4.74636	3.31174	4.48449	4.01074	3.75808	2.89964	3.83228	6.50023	4.99048	5.58141	5.15613	3.65593	3.85824	3.04143	4.49172	3.77699	4.83825	5.16109	4.62236	7.07801	3.11683	5.30676	4.38647	6.70428	3.89335	3.52131	2.7936
808.586	PC38:5	DLPC	2.44857	2.27556	1.98205	2.71097	2.34602	4.18573	2.80402	3.36145	2.22157	2.07059	2.83664	2.63955	2.82634	2.84803	3.40732	2.565	2.22336	1.88166	2.39403	2.02075	2.74464	1.77738	2.66695	2.30738	2.17025	1.52713	2.38639	3.06571	2.43654	2.22361	2.43756	1.51772	2.18798	2.43113	2.66853	1.78091	2.4676	2.76701	2.89607	3.14412	1.65589	2.29052	2.06543	2.83604	2.39682	2.50937	1.35811
806.57	PC38:6	DLPC	5.17531	3.46051	3.25866	4.63907	3.07463	4.69373	4.36442	4.24923	2.98687	1.81236	6.20113	3.67373	3.79532	5.08118	5.9033	2.89085	3.42253	2.58148	3.21681	3.24089	2.40821	1.59654	4.53819	4.01832	3.64958	1.88418	4.25766	3.81508	3.42775	2.38151	2.62241	2.54256	4.22246	4.02954	5.19212	2.42919	4.28597	3.9395	3.5961	4.31465	2.20706	3.12707	3.16371	3.74985	3.00104	3.61033	1.96779
846.695	PC40:0	DLPC	0.024084	0.0142356	0.01644	0.0158799	0.0175274	0.0164491	0.00890882	0.0104808	0.0132164	0.0108674	0.0158941	0.00975555	0.00609787	0.0194146	0.0186743	0.0153047	0.0110306	0.0125191	0.0111546	0.0127268	0.00597023	0.00454836	0.00535621	0.0166303	0.00933601	0.0104526	0.0112921	0.0155907	0.00939816	0.01099	0.00547763	0.0134121	0.00825075	0.0119305	0.0255792	0.00712294	0.00938986	0.0206656	0.0054346	0.0118768	0.00745412	0.00875835	0.00856742	0.00989008	0.00761234	0.015956	0.00892392
844.679	PC40:1	DLPC	0.0100502	0.00718497	0.00764484	0.00686573	0.00900284	0.0065988	0.00435476	0.00680256	0.00691032	0.00419008	0.00700862	0.00427379	0.0041542	0.00885068	0.00889192	0.00896194	0.0066802	0.00932728	0.0056882	0.00596828	0.00316238	0.00264807	0.00376275	0.00789068	0.00452126	0.00573301	0.00536869	0.00714086	0.00459041	0.00521057	0.0028088	0.00928129	0.00546861	0.0072248	0.00909855	0.00438241	0.00429831	0.00801171	0.00423655	0.00631259	0.00463925	0.00511505	0.00442355	0.00585275	0.00366299	0.00861743	0.00623825
842.664	PC40:2	DLPC	0.00913083	0.00794179	0.00682235	0.00731574	0.00885023	0.00730566	0.0056706	0.00853048	0.00792889	0.0055968	0.00745172	0.00533278	0.00639133	0.00931027	0.0110941	0.0133674	0.0072369	0.00901219	0.00749267	0.00737518	0.00493319	0.00434979	0.00530153	0.0109436	0.00587839	0.00901751	0.00636737	0.0073618	0.00661871	0.0058174	0.00523423	0.0115042	0.00669809	0.00664013	0.00827097	0.00662548	0.00600617	0.00827727	0.00508935	0.00740555	0.00600435	0.00520275	0.00525357	0.00602138	0.00561936	0.0111266	0.0097248
840.648	PC40:3	DLPC	0.0194416	0.0205428	0.0185378	0.0188818	0.0197803	0.0244697	0.0117398	0.0215308	0.0193945	0.0206702	0.0136539	0.0127481	0.0186805	0.0172447	0.0236184	0.0319868	0.0220718	0.0259269	0.022522	0.0179725	0.016695	0.0163035	0.0159984	0.0272064	0.0193215	0.0217357	0.0172597	0.0198686	0.0154235	0.0185662	0.0157387	0.0266697	0.0150949	0.014532	0.0142579	0.0138846	0.0168827	0.0157732	0.0190363	0.0206146	0.0162612	0.0168669	0.0170437	0.0233678	0.0159474	0.0281546	0.026345
838.633	PC40:4	DLPC	0.0825466	0.0856817	0.0963393	0.137134	0.0979591	0.163718	0.0930337	0.125188	0.116284	0.10207	0.0855965	0.0936292	0.127829	0.0845249	0.123726	0.141066	0.116113	0.120146	0.119201	0.121894	0.129894	0.0796165	0.106461	0.141713	0.127737	0.106457	0.101713	0.126433	0.100183	0.157645	0.129908	0.103822	0.0971632	0.0811787	0.11294	0.0978103	0.113463	0.0675118	0.157385	0.167227	0.100132	0.122794	0.1369	0.193626	0.120345	0.104874	0.101313
836.617	PC40:5	DLPC	0.338902	0.301197	0.284336	0.408285	0.290195	0.615988	0.375284	0.406671	0.350041	0.285271	0.344508	0.384909	0.530581	0.375968	0.501984	0.375608	0.385479	0.464666	0.339421	0.361118	0.4116	0.209489	0.436003	0.357853	0.43375	0.341381	0.394976	0.392138	0.332441	0.41509	0.386191	0.250555	0.315418	0.330604	0.415746	0.318395	0.3453	0.232592	0.445115	0.520361	0.317923	0.402674	0.412489	0.484748	0.38479	0.346803	0.219175
834.601	PC40:6	DLPC	1.11801	0.68107	0.81439	1.35197	0.653844	1.32604	0.864877	0.906429	0.744012	0.339336	1.18733	0.969787	1.21888	1.33455	1.43018	0.819891	1.2785	0.909853	0.876552	1.18148	0.888977	0.324054	1.33453	1.01958	1.30919	0.703536	1.08577	0.953925	0.914205	0.720439	0.763374	0.593687	0.831141	1.03145	1.29979	0.666387	1.00145	0.812681	0.847912	1.31864	0.684542	1.00314	0.882784	1.07102	0.755326	0.881363	0.520112
874.726	PC42:0	DLPC	0.024554	0.0150801	0.0143519	0.0155121	0.0187067	0.0174068	0.009539	0.0106553	0.0146391	0.0111267	0.0159863	0.00998265	0.00753996	0.0194117	0.0132579	0.021045	0.0202209	0.0112893	0.0112635	0.0113714	0.00498417	0.00383992	0.00572671	0.014923	0.00853889	0.0105459	0.0105762	0.0175815	0.00865939	0.0177638	0.00539291	0.017886	0.0062313	0.0118345	0.0235826	0.00496419	0.0064836	0.0267046	0.00836968	0.0104716	0.00715439	0.00830496	0.0074799	0.0111577	0.00548342	0.0161697	0.00917599
872.711	PC42:1	DLPC	0.0133965	0.00879452	0.00778568	0.00795021	0.0125647	0.00766429	0.00450587	0.00650761	0.00821383	0.00550858	0.00766163	0.00542418	0.00477161	0.0109931	0.00898627	0.0137688	0.0132377	0.00568255	0.00670683	0.00765477	0.0032873	0.00209707	0.00283391	0.00971583	0.00427962	0.00752902	0.00631835	0.00907576	0.00529793	0.00826182	0.00262576	0.0104462	0.00318956	0.00624867	0.0123729	0.00336228	0.00354941	0.0157281	0.00561033	0.00624792	0.00379654	0.00492512	0.00711221	0.00745007	0.00371606	0.0103121	0.00581735
870.695	PC42:2	DLPC	0.00703329	0.00596014	0.00607938	0.00440272	0.00593777	0.00285127	0.00316742	0.00350777	0.00399536	0.00347552	0.00589384	0.00241714	0.00254556	0.00576824	0.00764067	0.00667425	0.0048603	0.0031585	0.00401955	0.00639622	0.00175795	0.00135718	0.00251684	0.00622796	0.00285482	0.00395715	0.00323835	0.00383991	0.00334719	0.00332623	0.00180094	0.00378073	0.00246633	0.00274591	0.00691006	0.00291045	0.00252938	0.00773608	0.00318183	0.00323329	0.00216789	0.00226052	0.00214188	0.00333794	0.00295449	0.00424204	0.00234615
868.679	PC42:3	DLPC	0.00452657	0.00398636	0.00308823	0.00245856	0.00432532	0.00225876	0.0015794	0.00298587	0.00337221	0.00208469	0.00211056	0.00123213	0.00206089	0.00378598	0.0034543	0.00470856	0.00451852	0.00371746	0.00331306	0.0027818	0.00141771	0.00117637	0.00121108	0.00424601	0.00196636	0.00323819	0.00180757	0.00252784	0.00159361	0.00286803	0.00106991	0.00461902	0.00150431	0.00217259	0.00376729	0.00167332	0.00168588	0.00408221	0.00278259	0.00168055	0.00149011	0.0018369	0.00230295	0.00212897	0.00143049	0.00409261	0.00332656
866.664	PC42:4	DLPC	0.0048898	0.0056629	0.00388363	0.00448938	0.00489152	0.00438713	0.00298969	0.00478989	0.005785	0.00470948	0.00364084	0.003092	0.00427835	0.0052161	0.00581559	0.00812085	0.00583563	0.00497842	0.0053455	0.0050335	0.002729	0.00241515	0.00221782	0.00620039	0.00313891	0.00479442	0.0034517	0.00532827	0.00299357	0.00712008	0.00258836	0.00679003	0.00325718	0.00343359	0.00459463	0.00288163	0.00266382	0.00660136	0.00452485	0.00402875	0.00352871	0.00407303	0.00378975	0.00503945	0.00292781	0.00723518	0.00656823
864.648	PC42:5	DLPC	0.0102232	0.0077476	0.00634177	0.00914273	0.00912309	0.0103023	0.00563446	0.00935885	0.00942272	0.00697912	0.00678451	0.00665912	0.00812024	0.0084175	0.0119713	0.0130608	0.00863451	0.00951339	0.00600922	0.00934527	0.00669764	0.00403703	0.00570098	0.0106925	0.00617188	0.00750487	0.00680266	0.00969277	0.00654383	0.0154334	0.0047925	0.0119679	0.00633026	0.00607754	0.00932788	0.00540602	0.00576709	0.00832625	0.00889753	0.00730792	0.00671666	0.00853471	0.00693134	0.00883676	0.00693491	0.0116324	0.00962992
862.633	PC42:6	DLPC	0.0111913	0.00942872	0.0104358	0.0131246	0.0115282	0.0183575	0.00891343	0.0112093	0.0113767	0.00840399	0.00993441	0.00671751	0.01017	0.0125123	0.0140452	0.0167359	0.0109875	0.00857914	0.00892838	0.0109498	0.00893101	0.00400397	0.00721304	0.012502	0.00846756	0.00968781	0.00804075	0.012334	0.00798123	0.0153182	0.00655377	0.0116713	0.00531369	0.00749285	0.0097486	0.00572356	0.00694501	0.0121861	0.0129181	0.0107115	0.00710687	0.0103935	0.00660275	0.0136602	0.0087288	0.0132504	0.0101797
902.758	PC44:0	DLPC	0.0172449	0.011194	0.0127059	0.0114625	0.0166714	0.0126901	0.00593326	0.00722798	0.0107635	0.00842669	0.0122976	0.00753732	0.0073518	0.0171841	0.00901423	0.0242661	0.0189872	0.0122966	0.0116629	0.00854538	0.00342002	0.00446512	0.00459494	0.0154523	0.0074335	0.0119	0.00526995	0.0127565	0.00818565	0.0116122	0.00342734	0.0117771	0.00473282	0.0100996	0.0197226	0.00189438	0.00859216	0.0250887	0.0043393	0.00634431	0.00704996	0.00634826	0.00916875	0.00547145	0.0035919	0.0164065	0.0136469
900.742	PC44:1	DLPC	0.00832372	0.00499302	0.00539578	0.00498818	0.00874712	0.00518937	0.0023772	0.00503724	0.00565563	0.00325851	0.00574455	0.00320071	0.00378758	0.00967255	0.00521193	0.0139144	0.0117569	0.00649639	0.00579375	0.0045661	0.00141396	0.00194141	0.00219376	0.00783554	0.00297851	0.0066134	0.00249685	0.00704922	0.00363941	0.00714868	0.00140653	0.00911491	0.00229758	0.00448184	0.00984223	0.00145124	0.00259977	0.0118183	0.00297468	0.00313813	0.00319458	0.00345337	0.0047252	0.00258758	0.00166774	0.00779211	0.00607896
898.726	PC44:2	DLPC	0.00212837	0.00244709	0.00179534	0.00149037	0.00319683	0.00158844	0.00111178	0.00174473	0.00187606	0.00141523	0.0017236	0.000965166	0.00124548	0.00278164	0.00206111	0.00372245	0.00451559	0.00204515	0.00170358	0.00143453	0.000637878	0.000628427	0.000736661	0.00233924	0.00116559	0.00179848	0.00127952	0.00223894	0.00124914	0.00200831	0.000586808	0.00405773	0.000874343	0.00173109	0.00128284	0.000734024	0.000804398	0.00476458	0.00125336	0.00122538	0.00108167	0.00101368	0.0015852	0.000886577	0.000638122	0.00275588	0.00203756
896.711	PC44:3	DLPC	0.00234927	0.00220732	0.00219835	0.0015298	0.00219794	0.00126467	0.000850159	0.00157592	0.00162356	0.00100107	0.00182505	0.000755383	0.00159451	0.00225707	0.00233979	0.00306722	0.00271326	0.00192994	0.00142352	0.00185011	0.000585022	0.000719562	0.000695122	0.00223617	0.00116541	0.00137855	0.000965533	0.00140604	0.000991123	0.00147836	0.000376849	0.00281011	0.00135776	0.00161252	0.00235361	0.000650582	0.00135072	0.00413647	0.00104785	0.00113453	0.000594081	0.00101028	0.00119801	0.00108372	0.000980525	0.00238172	0.00219802
894.695	PC44:4	DLPC	0.00562604	0.00347095	0.00633939	0.00263321	0.00349522	0.00218401	0.00124995	0.00332254	0.00314429	0.00182059	0.00393019	0.0013646	0.00218143	0.00349057	0.00508175	0.00650852	0.00607885	0.0034635	0.00306522	0.00407781	0.000894646	0.00105394	0.000961981	0.00454472	0.00170907	0.00193787	0.00174527	0.00208712	0.00175628	0.00251736	0.00102429	0.0035013	0.00200905	0.00247407	0.00683881	0.00153657	0.00204302	0.0070441	0.00140487	0.0018142	0.00126758	0.00182703	0.00194061	0.00158862	0.00172436	0.00566186	0.00564945
892.679	PC44:5	DLPC	0.00301791	0.00261292	0.00173294	0.00306406	0.00454342	0.00216047	0.00105749	0.00651441	0.00515383	0.00178173	0.00154719	0.00105335	0.00203207	0.00295375	0.0036995	0.0116432	0.00930905	0.00930466	0.0059374	0.00302104	0.00120326	0.00194771	0.000924218	0.00699298	0.00153631	0.00361723	0.00147191	0.00265404	0.00203961	0.0037495	0.00114358	0.00720406	0.00195322	0.00266097	0.00176849	0.000760824	0.00163151	0.00785709	0.00188724	0.00170611	0.00134038	0.00331187	0.00313634	0.00172018	0.00104282	0.0121391	0.017776
890.664	PC44:6	DLPC	0.00357476	0.00231421	0.00141118	0.00305693	0.00589879	0.00231807	0.000654426	0.00874536	0.00685811	0.00131793	0.00138226	0.00093537	0.00268578	0.00380489	0.00343362	0.0179854	0.0115551	0.0155734	0.0094852	0.00275762	0.000951112	0.00198642	0.000418192	0.00827867	0.00153666	0.00477993	0.00161967	0.00339958	0.00241182	0.00517975	0.000737264	0.00944037	0.00171367	0.0031422	0.00183197	0.00075923	0.00191268	0.010371	0.00191669	0.00107232	0.0017379	0.00403303	0.00415031	0.00208583	0.00067686	0.017829	0.0231036
Table S10. Lipids detected in Geneva's cohort in type 2 diabetic (T2D) versus normal glucose tolerance (NGT) patients. Lipid concentrations were calculated relative to the relevant internal standards and then normalized to the total phsphate content of each total lipid extract and expressed as percentage of total lipid amount detected.
[truncated: 15 more columns]

## Sheet: Table S11
Lipid content per family (%)	Prediabetic mice β-Phb2 -/- and their controls (β-Phb2 fl/fl)	Rome's cohort in the basal state (B) and after pancreaticoduodenectomy (PTX)	Geneva's cohort in type 2 diabetic (T2D) and normal glucose tolerant (NGT) patients
SM	0,160±0,014	0,399±0,021	2,399±0,051
Cer	0,406±0,066	0,511±0,023	1,249±0,028
GlcCer	0,043±0,003	0,048±0,005	0,044±0,001
LysoPI	0,173±0,026	0,528±0,050	0,096±0,007
PI(O-)	0,247±0,036	0,358±0,033	0,079±0,003
Diacyl PI	6,364±0,239	3,290±0,250	2,757±0,067
Lyso PC	4,074±0,393	2,247±0,255	0,193±0,010
PC(O-)	2,112±0,083	6,371±0,201	4,676±0,110
Diacyl PC	84,036±0,614	83,236±0,483	83,998±0,218
LysoPE	0,239±0,021	0,182±0,016	0,193±0,010
PE(O-)	0,293±0,009	0,162±0,006	0,208±0,006
Diacyl PE	1,965±0,228	2,156±0,178	2,241±0,112
Table S11. Lipid family contents detected in all different cohorts. Lipid concentrations were calculated relative to the relevant internal standards and then normalized to the total phosphate content of each total lipid extract and expressed as percentage of total lipid amount detected. Then, individual lipids were summed by lipid family and expressed as percentage ± SEM.
