# Supplementary material
Source: publisher figshare collection journal article supplement (https://diabetesjournals.figshare.com/articles/dataset/_/24347638)
Supplement: Supplementary file 2 [file 1]

| Gene          | Species | Sense    | Sequence                    |
|---------------|---------|----------|-----------------------------|
| <i>Ubc</i>    | mouse   | Forward  | 5'-GCCCAGTGTACCACCAAGA-3'   |
|               |         | Reversed | 5'-CCCATCACACCCAAGAACA-3'   |
| <i>Gpr119</i> | mouse   | Forward  | 5'-CCAGGAATCGTGGTCCAG-3'    |
|               |         | Reversed | 5'-TGCATGTTCTTGAGAGAAGTCC-3 |

Table S7. List of primers used for real-time qPCR experiments.
