# Supplementary material
Source: publisher figshare collection journal article supplement (https://diabetesjournals.figshare.com/articles/dataset/_/24347638)
Supplement: Supplementary file 5 [file 1]

[illegible]

|        |      |    |    |    |    |    |    |    |    |
|--------|------|----|----|----|----|----|----|----|----|
| T2D_29 | 850  | NA | 50 | NA | NA | NA | NA | NA | 14 |
| T2D_30 | NA   | NA | NA | NA | NA | NA | NA | NA | NA |
| T2D_31 | 1000 | NA | 47 |

Table S3. Medications consumed by each T2D participant (Geneva cohort). NA: not applicable.
