# Supplementary material
Source: publisher figshare collection journal article supplement (https://diabetesjournals.figshare.com/articles/dataset/_/24347638)
Supplement: Supplementary file 6 [file 1]

| Subject characteristics                                 | NGT          | T2D         | p value |
|---------------------------------------------------------|--------------|-------------|---------|
| Gender (M:F)                                            | 16:15        | 15:16       | ---     |
| Mean Age (y)                                            | 56.5 ± 7.6   | 62.1 ± 9.6  | 0.01    |
| BMI (kg/m <sup>2</sup> )                                | 30.5 ± 7.3   | 29.9 ± 7.3  | 0.75    |
| Mean glucose (mmol/L)                                   | 9.1 ± 1.4    | 9.0 ± 2.3   | 0.88    |
| Fasting insulin (mU/l)                                  | 12.6 ± 9.3   | 16.3 ± 10.5 | 0.16    |
| HOMA %B                                                 | 117.4 ± 56.3 | 43.7 ± 19.8 | <0.0001 |
| HOMA %S                                                 | 95.5 ± 60.5  | 73.4 ± 65.0 | 0.19    |
| HOMA IR                                                 | 1.63 ± 1.16  | 2.42 ± 1.54 | 0.03    |
| 1,5-anhydroglucitol (µg/ml)                             | 18.4 ± 7.6   | 7.0 ± 6.5   | <0.0001 |
| Disposition Index (Matsuda index * Insulinogenic Index) | 8459 ± 2284  | 2356 ± 1189 | <0.0001 |
| HbA1c (%)                                               | 5.4 ± 0.24   | 8.0 ± 1.4   | <0.0001 |

Table S2. Clinical and metabolic characteristics of subjects with normal glucose tolerance (NGT) and type 2 diabetic (T2D) of Geneva cohort. Data are means ± SD or n. (gender distribution), p value is calculated upon an unpaired student's t-test with <0.05 considered as statistically significant.
