# Supplementary material
Source: publisher figshare collection journal article supplement (https://diabetesjournals.figshare.com/articles/dataset/_/24347638)
Supplement: Supplementary file 7 [file 1]

| Subject characteristics                                 | Baseline       | After surgery  | p value |
|---------------------------------------------------------|----------------|----------------|---------|
| Sex (M:F)                                               | 3:6            | ----           | ---     |
| Mean Age (y)                                            | 62.8 ± 14.8    | ----           | ---     |
| BMI (kg/m <sup>2</sup> )                                | 27.1 ± 3.81    | 24.0 ± 2.91    | <0.01   |
| Fasting glucose (mmol/L)                                | 5.51 ± 0.71    | 5.71 ± 1.43    | 0.76    |
| Mean glucose (mmol/L)                                   | 9.11 ± 1.41    | 9.01 ± 2.34    | 0.88    |
| Fasting insulin (pmol/l)                                | 82.6 ± 42.9    | 27.3 ± 13.9    | 0.02    |
| Mean Insulin (pmol/l)                                   | 388 ± 46.8     | 103 ± 78.3     | 0.02    |
| Fasting C-peptide (ng/ml)                               | 2.46 ± 1.72    | 1.34 ± 1.22    | 0.13    |
| Insulinogenic Index                                     | 0.84 ± 0.70    | 0.20 ± 0.28    | 0.02    |
| Disposition Index (Matsuda index * Insulinogenic Index) | 1.91 ± 2.00    | 0.84 ± 0.70    | 0.83    |
| AUC Glucose (mg*t/dl)                                   | 19906 ± 1019.1 | 20933 ± 1785.8 | 0.61    |
| AUC Insulin (mcUI*t/ml)                                 | 8404 ± 1417    | 2240 ± 607.9   | <0.01   |
| AUC C-peptide (ng*t/ml)                                 | 1086 ± 130.6   | 362.3 ± 91.31  | <0.01   |

Table S1. Clinical and OGTT-derived metabolic characteristics of patients before and after partial pancreaticoduodenectomy of Rome cohort. Data are means ± SD or n. (sex distribution), p value is calculated upon a paired student's t-test with <0.05 considered as statistically significant.
