# Supplementary material
Source: publisher figshare collection journal article supplement (https://diabetesjournals.figshare.com/articles/dataset/_/24347638)
Supplement: Supplementary file 8 [file 1]

| Subject characteristics               |              |
|---------------------------------------|--------------|
| Gender (M:F)                          | 22:8         |
| Mean Age (y)                          | 61.4 ± 6.5   |
| BMI (kg/m <sup>2</sup> )              | 29.7 ± 2.5   |
| Fasting glucose (mmol/L)              | 5.6 ± 0.4    |
| Fasting insulin (pmol/L)              | 12.6 ± 9.3   |
| HOMA %B                               | 102.4 ± 49.5 |
| HOMA %S                               | 88.1 ± 54.0  |
| HOMA IR                               | 1.61 1.10    |
| 1,5-anhydroglucitol (µg/ml)           | 16.6 ± 6.2   |
| Disposition Index (HOMA %B * HOMA %S) | 6742 ± 1947  |
| HbA1c (%)                             | 5.6 ± 0.3    |
| OGIS (ml/kg/min)                      | 332 ± 39     |

Table S4. Clinical and metabolic characteristics of patients at high risk of developing diabetes from the Maastricht cohort, as defined in the materials and methods section. Data are means ± SD or n. (gender distribution).
